# Supplementary material for: An atlas of chromatin accessibility in the adult human brain
Source: HighWire-hosted journal article supplement (doi:10.1101/gr.232488.117), 2018-06-26
Supplement: Supplemental_table_S5.xlsx [file Supplemental_table_S5.xlsx]

## Sheet: Results Table
Dataset	Annotation	Tissue	GWAS Trait	GWAS Pubmed	Prop. h2	Prop. h2 std error	Enrichment	Enrichment std error	Enrichment p	Coefficient	Coefficient std error	Coefficient p
ldscAll	Merged Neuronal	Brain	Schizophrenia	25056061	0.411679	0.0400064	2.18665	0.212496	5.25e-08	6.29e-08	1.8e-08	0.000242864
ldscAll	Merged Neuronal	Brain	Alzheimer's Disease	24162737	0.280818	0.215055	1.49158	1.14227	0.662132	-3.08e-09	1.49e-08	0.581934
ldscAll	Merged Neuronal	Brain	ADHD	-	0.354476	0.0876515	1.88281	0.465564	0.0539091	2.56e-08	1.94e-08	0.093126
ldscAll	Merged Neuronal	Brain	Autism	-	0.351716	0.0904963	1.86815	0.480675	0.0667783	1.62e-08	1.74e-08	0.177148
ldscAll	Merged Neuronal	Brain	Education Years	28197077	0.413091	0.0411425	2.19415	0.21853	1.56e-07	1.74e-08	4.84e-09	0.00016262
ldscAll	Merged Neuronal	Brain	Subjective Well Being	27089181	0.475747	0.111323	2.52695	0.591298	0.00506435	5.1e-09	2.59e-09	0.0242217
ldscAll	Merged Neuronal	Brain	Neuroticism	27089181	0.356206	0.069513	1.892	0.369221	0.00960427	8.82e-09	6.08e-09	0.0733656
ldscAll	Merged Neuronal	Brain	Depressive Symptoms	27089181	0.386803	0.103385	2.05452	0.549132	0.0599611	2.55e-09	4.4e-09	0.281214
ldscAll	Merged Neuronal	Brain	Chronotype	27494321	0.217736	0.065256	1.15651	0.34661	0.650589	-5.64e-09	6.48e-09	0.808265
ldscAll	Merged Neuronal	Brain	Sleep Duration	27494321	0.372218	0.0932192	1.97705	0.495138	0.0466128	1e-08	5.33e-09	0.0298007
ldscAll	Merged Neuronal	Brain	BMI	25673413	0.315337	0.0681295	1.67493	0.361872	0.0597823	6.24e-09	1.05e-08	0.27605
ldscAll	Merged Neuronal	Brain	Height	25282103	0.233378	0.0386213	1.2396	0.205139	0.241673	-2.73e-08	1.49e-08	0.96631
ldscAll	Merged Neuronal	Brain	Crohn's Disease	26192919	0.254604	0.0885231	1.35234	0.470194	0.459208	-3.14e-08	5.19e-08	0.727578
ldscAll	Merged Neuronal	Brain	Ulcerative Colitis	26192919	0.154492	0.102382	0.820588	0.543805	0.741698	-4.48e-08	3.24e-08	0.916665
ldscAll	Merged Neuronal	Brain	Coronary Artery Disease	26343387	0.265304	0.0988417	1.40917	0.525001	0.433855	-5.56e-09	8.73e-09	0.73806
ldscAll	Merged non-Neuronal	Brain	Schizophrenia	25056061	0.122222	0.0313185	1.70964	0.438082	0.102174	-2.09e-08	3.36e-08	0.733327
ldscAll	Merged non-Neuronal	Brain	Alzheimer's Disease	24162737	0.211542	0.175667	2.95904	2.45723	0.42272	-2.1e-08	2.77e-08	0.776098
ldscAll	Merged non-Neuronal	Brain	ADHD	-	0.167303	0.0647165	2.34022	0.905252	0.135817	3.88e-08	3.27e-08	0.117797
ldscAll	Merged non-Neuronal	Brain	Autism	-	0.109812	0.0702745	1.53604	0.982997	0.587368	-5.36e-09	3.34e-08	0.563774
ldscAll	Merged non-Neuronal	Brain	Education Years	28197077	0.164764	0.0290359	2.30472	0.406152	0.00137769	9.19e-09	7.9e-09	0.122365
ldscAll	Merged non-Neuronal	Brain	Subjective Well Being	27089181	0.207667	0.0807761	2.90483	1.12989	0.079389	4.91e-09	4.74e-09	0.149974
ldscAll	Merged non-Neuronal	Brain	Neuroticism	27089181	0.158018	0.0518025	2.21034	0.724611	0.0976325	1.21e-08	1.08e-08	0.132257
ldscAll	Merged non-Neuronal	Brain	Depressive Symptoms	27089181	0.218092	0.0831295	3.05066	1.16281	0.082085	5.96e-09	8.74e-09	0.247786
ldscAll	Merged non-Neuronal	Brain	Chronotype	27494321	0.128036	0.0541283	1.79096	0.757144	0.295704	-2.62e-09	1.36e-08	0.576115
ldscAll	Merged non-Neuronal	Brain	Sleep Duration	27494321	0.0965092	0.074292	1.34997	1.03919	0.73566	4.36e-09	1.05e-08	0.338836
ldscAll	Merged non-Neuronal	Brain	BMI	25673413	0.132655	0.0279495	1.85557	0.390956	0.0313304	-1.17e-09	1.1e-08	0.542235
ldscAll	Merged non-Neuronal	Brain	Height	25282103	0.156796	0.032066	2.19325	0.448537	0.00794055	-2.92e-08	3.03e-08	0.832311
ldscAll	Merged non-Neuronal	Brain	Crohn's Disease	26192919	0.104447	0.0642512	1.46101	0.898742	0.60765	-1.65e-07	9.17e-08	0.963905
ldscAll	Merged non-Neuronal	Brain	Ulcerative Colitis	26192919	0.0117308	0.0872864	0.16409	1.22096	0.490774	-1.54e-07	6.39e-08	0.99215
ldscAll	Merged non-Neuronal	Brain	Coronary Artery Disease	26343387	0.114858	0.058643	1.60663	0.820295	0.456978	-1.98e-08	1.34e-08	0.930158
ldscAll	Merged	Brain	Schizophrenia	25056061	0.432796	0.0414977	1.9627	0.188189	4.4e-07	4.42e-08	1.69e-08	0.00436565
ldscAll	Merged	Brain	Alzheimer's Disease	24162737	0.343322	0.222563	1.55694	1.00931	0.576413	-3.94e-09	1.34e-08	0.615659
ldscAll	Merged	Brain	ADHD	-	0.389057	0.0911323	1.76434	0.413277	0.0606702	2.04e-08	1.78e-08	0.126223
ldscAll	Merged	Brain	Autism	-	0.355507	0.09328	1.6122	0.423017	0.146769	6.56e-09	1.64e-08	0.344233
ldscAll	Merged	Brain	Education Years	28197077	0.452168	0.0423863	2.05054	0.192219	1.37e-07	1.43e-08	4.39e-09	0.000560556
ldscAll	Merged	Brain	Subjective Well Being	27089181	0.555604	0.118634	2.51962	0.537996	0.00201553	5.1e-09	2.47e-09	0.0194552
ldscAll	Merged	Brain	Neuroticism	27089181	0.430832	0.0733951	1.95379	0.332841	0.00232036	1.03e-08	5.7e-09	0.034819
ldscAll	Merged	Brain	Depressive Symptoms	27089181	0.459199	0.111954	2.08243	0.507702	0.0367795	3.18e-09	4.26e-09	0.227485
ldscAll	Merged	Brain	Chronotype	27494321	0.263732	0.0711285	1.196	0.322562	0.54219	-5.09e-09	6.36e-09	0.788363
ldscAll	Merged	Brain	Sleep Duration	27494321	0.405053	0.0986218	1.83688	0.447242	0.0592247	8.75e-09	5.04e-09	0.0411073
ldscAll	Merged	Brain	BMI	25673413	0.351111	0.0716868	1.59226	0.325094	0.0641155	3.15e-09	1.02e-08	0.378964
ldscAll	Merged	Brain	Height	25282103	0.288135	0.0423302	1.30667	0.191964	0.108602	-2.75e-08	1.5e-08	0.966602
ldscAll	Merged	Brain	Crohn's Disease	26192919	0.309154	0.0899434	1.40199	0.407886	0.331771	-3.69e-08	4.7e-08	0.783819
ldscAll	Merged	Brain	Ulcerative Colitis	26192919	0.163601	0.116135	0.741919	0.526662	0.624413	-5.82e-08	3.26e-08	0.962793
ldscAll	Merged	Brain	Coronary Artery Disease	26343387	0.330491	0.100019	1.49875	0.453577	0.270227	-5.98e-09	8.01e-09	0.772303
ldscAll	DLPFC Neuronal	Brain	Schizophrenia	25056061	0.218959	0.0278933	4.00977	0.510806	7.2e-09	1.65e-07	3.73e-08	5.26e-06
ldscAll	DLPFC Neuronal	Brain	Alzheimer's Disease	24162737	0.0917282	0.14816	1.67981	2.71323	0.80367	-2.42e-08	3.35e-08	0.764612
ldscAll	DLPFC Neuronal	Brain	ADHD	-	0.172625	0.0567639	3.16127	1.03951	0.0343745	7.22e-08	3.83e-08	0.0297179
ldscAll	DLPFC Neuronal	Brain	Autism	-	0.126403	0.0678691	2.3148	1.24288	0.283747	2.19e-08	3.94e-08	0.289735
ldscAll	DLPFC Neuronal	Brain	Education Years	28197077	0.206268	0.0292648	3.77737	0.535924	5.69e-07	4.12e-08	1.04e-08	3.88e-05
ldscAll	DLPFC Neuronal	Brain	Subjective Well Being	27089181	0.198785	0.0713269	3.64033	1.3062	0.0339285	8.5e-09	5e-09	0.0444548
ldscAll	DLPFC Neuronal	Brain	Neuroticism	27089181	0.121481	0.0483827	2.22466	0.886027	0.147875	1.13e-08	1.28e-08	0.187694
ldscAll	DLPFC Neuronal	Brain	Depressive Symptoms	27089181	0.172727	0.0738771	3.16313	1.3529	0.115153	5.96e-09	9.57e-09	0.266824
ldscAll	DLPFC Neuronal	Brain	Chronotype	27494321	0.0852079	0.0474076	1.5604	0.86817	0.517747	-5.47e-09	1.36e-08	0.656292
ldscAll	DLPFC Neuronal	Brain	Sleep Duration	27494321	0.0789029	0.0651523	1.44494	1.19313	0.70929	6.15e-09	1.16e-08	0.297432
ldscAll	DLPFC Neuronal	Brain	BMI	25673413	0.144851	0.0509792	2.65264	0.933575	0.0772676	2.24e-08	2.34e-08	0.16892
ldscAll	DLPFC Neuronal	Brain	Height	25282103	0.0950922	0.0273229	1.74141	0.500361	0.139138	-3.95e-08	3.06e-08	0.901613
ldscAll	DLPFC Neuronal	Brain	Crohn's Disease	26192919	0.0518569	0.0572928	0.94965	1.0492	0.96155	-1.75e-07	9.56e-08	0.966646
ldscAll	DLPFC Neuronal	Brain	Ulcerative Colitis	26192919	-0.0337639	0.0716826	-0.618314	1.31271	0.212175	-1.62e-07	6.76e-08	0.991834
ldscAll	DLPFC Neuronal	Brain	Coronary Artery Disease	26343387	0.0706276	0.0669004	1.29339	1.22514	0.809864	-1.74e-08	1.71e-08	0.844327
ldscAll	OFC Neuronal	Brain	Schizophrenia	25056061	0.240464	0.0287757	3.99607	0.478199	1.17e-09	1.65e-07	3.54e-08	1.54e-06
ldscAll	OFC Neuronal	Brain	Alzheimer's Disease	24162737	0.114899	0.158412	1.90941	2.63251	0.729554	-2e-08	3.14e-08	0.737361
ldscAll	OFC Neuronal	Brain	ADHD	-	0.137846	0.0580713	2.29074	0.965037	0.178425	3.86e-08	3.61e-08	0.142483
ldscAll	OFC Neuronal	Brain	Autism	-	0.184018	0.0728631	3.05804	1.21085	0.0804703	4.65e-08	3.84e-08	0.112962
ldscAll	OFC Neuronal	Brain	Education Years	28197077	0.238723	0.0305453	3.96714	0.507607	1.8e-08	4.57e-08	1e-08	2.47e-06
ldscAll	OFC Neuronal	Brain	Subjective Well Being	27089181	0.168295	0.0711219	2.79675	1.18191	0.118254	4.8e-09	4.72e-09	0.154394
ldscAll	OFC Neuronal	Brain	Neuroticism	27089181	0.152129	0.0483344	2.5281	0.803229	0.0441952	1.58e-08	1.18e-08	0.0901955
ldscAll	OFC Neuronal	Brain	Depressive Symptoms	27089181	0.16273	0.0694855	2.70426	1.15472	0.146535	2.39e-09	8.33e-09	0.387225
ldscAll	OFC Neuronal	Brain	Chronotype	27494321	0.0915317	0.0511062	1.52109	0.849291	0.537814	-5.97e-09	1.36e-08	0.669252
ldscAll	OFC Neuronal	Brain	Sleep Duration	27494321	0.120064	0.066272	1.99524	1.10132	0.367415	1.14e-08	1.05e-08	0.138048
ldscAll	OFC Neuronal	Brain	BMI	25673413	0.167733	0.0385084	2.78741	0.639938	0.00762061	2.58e-08	1.65e-08	0.059271
ldscAll	OFC Neuronal	Brain	Height	25282103	0.106553	0.0293038	1.77072	0.486975	0.115471	-3.72e-08	2.95e-08	0.896021
ldscAll	OFC Neuronal	Brain	Crohn's Disease	26192919	0.0537636	0.061803	0.893451	1.02705	0.916854	-1.79e-07	9.5e-08	0.970327
ldscAll	OFC Neuronal	Brain	Ulcerative Colitis	26192919	-0.0371941	0.0784018	-0.618097	1.30289	0.208942	-1.63e-07	6.61e-08	0.993109
ldscAll	OFC Neuronal	Brain	Coronary Artery Disease	26343387	0.0958079	0.066305	1.59215	1.10187	0.590195	-1.33e-08	1.59e-08	0.797432
ldscAll	VLPFC Neuronal	Brain	Schizophrenia	25056061	0.258588	0.0291364	4.10897	0.462977	1.1e-10	1.76e-07	3.48e-08	2.2e-07
ldscAll	VLPFC Neuronal	Brain	Alzheimer's Disease	24162737	0.146644	0.158299	2.33017	2.51537	0.597778	-1.35e-08	3.06e-08	0.67037
ldscAll	VLPFC Neuronal	Brain	ADHD	-	0.198062	0.0619397	3.14721	0.984221	0.0282362	7.17e-08	3.66e-08	0.0248514
ldscAll	VLPFC Neuronal	Brain	Autism	-	0.223461	0.0730482	3.5508	1.16073	0.0241767	6.34e-08	3.62e-08	0.0399495
ldscAll	VLPFC Neuronal	Brain	Education Years	28197077	0.271909	0.0324957	4.32063	0.516356	7.86e-10	5.36e-08	1.01e-08	5.75e-08
ldscAll	VLPFC Neuronal	Brain	Subjective Well Being	27089181	0.167078	0.0756904	2.65487	1.20272	0.158648	4.24e-09	4.85e-09	0.191047
ldscAll	VLPFC Neuronal	Brain	Neuroticism	27089181	0.193775	0.0512908	3.07908	0.815009	0.00627956	2.43e-08	1.17e-08	0.0191663
ldscAll	VLPFC Neuronal	Brain	Depressive Symptoms	27089181	0.201174	0.0742781	3.19665	1.18028	0.0688893	6.67e-09	8.41e-09	0.213834
ldscAll	VLPFC Neuronal	Brain	Chronotype	27494321	0.0983836	0.0521524	1.56331	0.828701	0.494217	-4.78e-09	1.32e-08	0.641032
ldscAll	VLPFC Neuronal	Brain	Sleep Duration	27494321	0.13536	0.0674371	2.15086	1.07157	0.284389	1.28e-08	1.05e-08	0.111476
ldscAll	VLPFC Neuronal	Brain	BMI	25673413	0.16617	0.0527948	2.64044	0.838909	0.0522291	2.25e-08	2.13e-08	0.145463
ldscAll	VLPFC Neuronal	Brain	Height	25282103	0.112636	0.0284522	1.78978	0.452105	0.0819993	-3.33e-08	2.76e-08	0.885836
ldscAll	VLPFC Neuronal	Brain	Crohn's Disease	26192919	0.0534221	0.0638729	0.848876	1.01494	0.880866	-1.76e-07	9.41e-08	0.969224
ldscAll	VLPFC Neuronal	Brain	Ulcerative Colitis	26192919	0.00346414	0.0783412	0.055045	1.24484	0.444069	-1.23e-07	6.4e-08	0.972661
ldscAll	VLPFC Neuronal	Brain	Coronary Artery Disease	26343387	0.0743921	0.0757976	1.18209	1.20442	0.879311	-1.92e-08	1.7e-08	0.870319
ldscAll	ACC Neuronal	Brain	Schizophrenia	25056061	0.201721	0.0271668	3.87375	0.521699	6.7e-08	1.52e-07	3.87e-08	4.05e-05
ldscAll	ACC Neuronal	Brain	Alzheimer's Disease	24162737	0.159675	0.150321	3.06632	2.8867	0.477378	-7.87e-09	3.47e-08	0.589724
ldscAll	ACC Neuronal	Brain	ADHD	-	0.12769	0.0555955	2.4521	1.06763	0.171692	4.48e-08	3.89e-08	0.125084
ldscAll	ACC Neuronal	Brain	Autism	-	0.120968	0.0692164	2.32302	1.3292	0.313194	2.07e-08	4.18e-08	0.309981
ldscAll	ACC Neuronal	Brain	Education Years	28197077	0.221835	0.0286534	4.26002	0.550248	2.21e-08	5.07e-08	1.08e-08	1.24e-06
ldscAll	ACC Neuronal	Brain	Subjective Well Being	27089181	0.200242	0.0740022	3.84535	1.42111	0.0348703	9.28e-09	5.36e-09	0.0416677
ldscAll	ACC Neuronal	Brain	Neuroticism	27089181	0.109469	0.0455952	2.10218	0.87559	0.191069	9.11e-09	1.29e-08	0.23941
ldscAll	ACC Neuronal	Brain	Depressive Symptoms	27089181	0.142218	0.072645	2.73109	1.39504	0.2182	1.79e-09	9.89e-09	0.428005
ldscAll	ACC Neuronal	Brain	Chronotype	27494321	0.077758	0.0488452	1.49323	0.938	0.597473	-6.84e-09	1.49e-08	0.676469
ldscAll	ACC Neuronal	Brain	Sleep Duration	27494321	0.0764062	0.0631521	1.46727	1.21274	0.699792	6.45e-09	1.18e-08	0.292559
ldscAll	ACC Neuronal	Brain	BMI	25673413	0.125845	0.0487522	2.41667	0.936214	0.13086	1.63e-08	2.33e-08	0.242378
ldscAll	ACC Neuronal	Brain	Height	25282103	0.0922454	0.0289364	1.77144	0.555682	0.166301	-3.91e-08	3.29e-08	0.882823
ldscAll	ACC Neuronal	Brain	Crohn's Disease	26192919	0.0680396	0.063608	1.3066	1.2215	0.801756	-1.48e-07	1.11e-07	0.907755
ldscAll	ACC Neuronal	Brain	Ulcerative Colitis	26192919	-0.0282689	0.0746988	-0.542864	1.43448	0.277114	-1.63e-07	7.2e-08	0.988295
ldscAll	ACC Neuronal	Brain	Coronary Artery Disease	26343387	0.0299103	0.0684988	0.574384	1.31542	0.746023	-2.89e-08	1.88e-08	0.937862
ldscAll	STC Neuronal	Brain	Schizophrenia	25056061	0.252727	0.0283462	4.51198	0.50607	1.95e-11	2.02e-07	3.64e-08	1.46e-08
ldscAll	STC Neuronal	Brain	Alzheimer's Disease	24162737	0.0934096	0.159574	1.66766	2.8489	0.815981	-2.6e-08	3.52e-08	0.769588
ldscAll	STC Neuronal	Brain	ADHD	-	0.151574	0.0576618	2.70607	1.02945	0.0940657	5.53e-08	3.87e-08	0.0762871
ldscAll	STC Neuronal	Brain	Autism	-	0.200822	0.0706394	3.58531	1.26114	0.0353236	6.37e-08	3.96e-08	0.0538714
ldscAll	STC Neuronal	Brain	Education Years	28197077	0.235413	0.0298676	4.20288	0.533233	8.28e-09	5.02e-08	1.04e-08	7.26e-07
ldscAll	STC Neuronal	Brain	Subjective Well Being	27089181	0.162452	0.0722842	2.90028	1.2905	0.128603	5.27e-09	5.11e-09	0.151246
ldscAll	STC Neuronal	Brain	Neuroticism	27089181	0.175923	0.0500507	3.14078	0.893565	0.0110921	2.52e-08	1.27e-08	0.0235553
ldscAll	STC Neuronal	Brain	Depressive Symptoms	27089181	0.183582	0.0741059	3.27752	1.32303	0.0895035	6.33e-09	9.54e-09	0.253709
ldscAll	STC Neuronal	Brain	Chronotype	27494321	0.0719874	0.0505951	1.2852	0.903284	0.751735	-1.09e-08	1.46e-08	0.771256
ldscAll	STC Neuronal	Brain	Sleep Duration	27494321	0.0951861	0.0636563	1.69938	1.13647	0.537531	8.62e-09	1.11e-08	0.219028
ldscAll	STC Neuronal	Brain	BMI	25673413	0.133414	0.039717	2.38186	0.709074	0.0504803	1.5e-08	1.77e-08	0.198276
ldscAll	STC Neuronal	Brain	Height	25282103	0.102156	0.0281823	1.82381	0.503145	0.103156	-3.96e-08	3e-08	0.906784
ldscAll	STC Neuronal	Brain	Crohn's Disease	26192919	0.0507898	0.0632543	0.906759	1.12929	0.933701	-1.94e-07	1.05e-07	0.968177
ldscAll	STC Neuronal	Brain	Ulcerative Colitis	26192919	-0.0561946	0.0715818	-1.00325	1.27796	0.114356	-1.91e-07	6.78e-08	0.997583
ldscAll	STC Neuronal	Brain	Coronary Artery Disease	26343387	0.102461	0.0708844	1.82926	1.26551	0.510344	-1.05e-08	1.78e-08	0.722845
ldscAll	ITC Neuronal	Brain	Schizophrenia	25056061	0.183532	0.0252661	3.84901	0.529876	1.25e-07	1.48e-07	3.82e-08	5.67e-05
ldscAll	ITC Neuronal	Brain	Alzheimer's Disease	24162737	0.0883154	0.144292	1.85214	3.02607	0.777268	-2.18e-08	3.52e-08	0.732318
ldscAll	ITC Neuronal	Brain	ADHD	-	0.110931	0.0542472	2.32642	1.13766	0.241086	3.85e-08	4.18e-08	0.178657
ldscAll	ITC Neuronal	Brain	Autism	-	0.119878	0.0662512	2.51406	1.38941	0.265441	2.57e-08	4.33e-08	0.276758
ldscAll	ITC Neuronal	Brain	Education Years	28197077	0.194635	0.0276312	4.08186	0.579477	3.1e-07	4.6e-08	1.11e-08	1.72e-05
ldscAll	ITC Neuronal	Brain	Subjective Well Being	27089181	0.153845	0.068531	3.22642	1.43722	0.10824	6.48e-09	5.51e-09	0.119779
ldscAll	ITC Neuronal	Brain	Neuroticism	27089181	0.128004	0.044326	2.68447	0.929598	0.0522058	1.75e-08	1.29e-08	0.0881213
ldscAll	ITC Neuronal	Brain	Depressive Symptoms	27089181	0.139475	0.0622284	2.92506	1.30504	0.146254	2.86e-09	9.18e-09	0.377565
ldscAll	ITC Neuronal	Brain	Chronotype	27494321	0.0488244	0.0455901	1.02394	0.956107	0.980016	-1.52e-08	1.51e-08	0.843772
ldscAll	ITC Neuronal	Brain	Sleep Duration	27494321	0.104865	0.0618123	2.19921	1.29632	0.351684	1.37e-08	1.24e-08	0.135638
ldscAll	ITC Neuronal	Brain	BMI	25673413	0.0937255	0.0401294	1.9656	0.841587	0.248519	4.6e-09	2.04e-08	0.410937
ldscAll	ITC Neuronal	Brain	Height	25282103	0.0787842	0.0268951	1.65225	0.56404	0.248092	-4.69e-08	3.35e-08	0.919381
ldscAll	ITC Neuronal	Brain	Crohn's Disease	26192919	0.0575057	0.0542133	1.206	1.13695	0.856244	-1.58e-07	1.03e-07	0.938659
ldscAll	ITC Neuronal	Brain	Ulcerative Colitis	26192919	-0.0305921	0.0674522	-0.641573	1.4146	0.244814	-1.67e-07	7.08e-08	0.990744
ldscAll	ITC Neuronal	Brain	Coronary Artery Disease	26343387	0.0620885	0.0614072	1.30211	1.28782	0.81367	-1.71e-08	1.82e-08	0.826255
ldscAll	PMC Neuronal	Brain	Schizophrenia	25056061	0.198564	0.0294865	3.17316	0.471211	3.5e-06	1.07e-07	3.41e-08	0.000836651
ldscAll	PMC Neuronal	Brain	Alzheimer's Disease	24162737	0.188612	0.162788	3.01412	2.60144	0.436921	-1.97e-09	3.09e-08	0.525413
ldscAll	PMC Neuronal	Brain	ADHD	-	0.142673	0.0599433	2.27999	0.957927	0.177559	3.82e-08	3.54e-08	0.14008
ldscAll	PMC Neuronal	Brain	Autism	-	0.152164	0.0723621	2.43166	1.15639	0.202334	2.63e-08	3.64e-08	0.234831
ldscAll	PMC Neuronal	Brain	Education Years	28197077	0.210069	0.0306113	3.35703	0.489186	3.14e-06	3.36e-08	9.58e-09	0.000226346
ldscAll	PMC Neuronal	Brain	Subjective Well Being	27089181	0.172803	0.0777057	2.76149	1.24178	0.140049	4.79e-09	4.85e-09	0.161482
ldscAll	PMC Neuronal	Brain	Neuroticism	27089181	0.122955	0.0529832	1.96489	0.8467	0.229998	7.28e-09	1.23e-08	0.277673
ldscAll	PMC Neuronal	Brain	Depressive Symptoms	27089181	0.18298	0.0789925	2.92412	1.26234	0.131806	4.7e-09	8.89e-09	0.298406
ldscAll	PMC Neuronal	Brain	Chronotype	27494321	0.0421897	0.047704	0.674214	0.762336	0.670005	-1.91e-08	1.22e-08	0.94146
ldscAll	PMC Neuronal	Brain	Sleep Duration	27494321	0.0456891	0.0690391	0.730138	1.10328	0.806757	-1.6e-09	1.07e-08	0.55918
ldscAll	PMC Neuronal	Brain	BMI	25673413	0.127329	0.0518661	2.03478	0.82885	0.209375	8.56e-09	2.05e-08	0.338094
ldscAll	PMC Neuronal	Brain	Height	25282103	0.0995393	0.0302123	1.59069	0.482809	0.221659	-3.81e-08	2.92e-08	0.904318
ldscAll	PMC Neuronal	Brain	Crohn's Disease	26192919	0.0444013	0.0599064	0.709557	0.957338	0.759789	-1.78e-07	9.03e-08	0.975676
ldscAll	PMC Neuronal	Brain	Ulcerative Colitis	26192919	-0.0454659	0.0743201	-0.726571	1.18768	0.144368	-1.58e-07	6.05e-08	0.995429
ldscAll	PMC Neuronal	Brain	Coronary Artery Disease	26343387	0.0385992	0.0696489	0.616837	1.11303	0.730489	-2.58e-08	1.6e-08	0.946403
ldscAll	INS Neuronal	Brain	Schizophrenia	25056061	0.183607	0.0274004	3.64355	0.543741	1.58e-06	1.37e-07	3.93e-08	0.00025312
ldscAll	INS Neuronal	Brain	Alzheimer's Disease	24162737	0.158204	0.155549	3.13944	3.08675	0.486013	-5.49e-09	3.59e-08	0.560715
ldscAll	INS Neuronal	Brain	ADHD	-	0.109633	0.055067	2.1756	1.09277	0.280107	3.4e-08	4.04e-08	0.200415
ldscAll	INS Neuronal	Brain	Autism	-	0.127954	0.0636202	2.53916	1.2625	0.214198	2.85e-08	4e-08	0.237781
ldscAll	INS Neuronal	Brain	Education Years	28197077	0.175715	0.0287291	3.48693	0.570109	2.53e-05	3.5e-08	1.11e-08	0.000806173
ldscAll	INS Neuronal	Brain	Subjective Well Being	27089181	0.153089	0.0685934	3.03793	1.36119	0.117362	5.9e-09	5.22e-09	0.12912
ldscAll	INS Neuronal	Brain	Neuroticism	27089181	0.0780498	0.046848	1.54884	0.929666	0.544591	1.15e-09	1.37e-08	0.466696
ldscAll	INS Neuronal	Brain	Depressive Symptoms	27089181	0.157241	0.0722805	3.12034	1.43436	0.143428	5.45e-09	1.03e-08	0.298194
ldscAll	INS Neuronal	Brain	Chronotype	27494321	0.0630123	0.0485367	1.25044	0.963177	0.794432	-1.07e-08	1.52e-08	0.759043
ldscAll	INS Neuronal	Brain	Sleep Duration	27494321	0.080526	0.0671108	1.59798	1.33177	0.652155	7.96e-09	1.3e-08	0.269507
ldscAll	INS Neuronal	Brain	BMI	25673413	0.110426	0.0421977	2.19132	0.837383	0.153322	1.16e-08	2.04e-08	0.28395
ldscAll	INS Neuronal	Brain	Height	25282103	0.103957	0.0266587	2.06295	0.529023	0.0458542	-1.52e-08	3.17e-08	0.684013
ldscAll	INS Neuronal	Brain	Crohn's Disease	26192919	0.0270067	0.053417	0.535928	1.06002	0.658335	-2.12e-07	9.4e-08	0.988076
ldscAll	INS Neuronal	Brain	Ulcerative Colitis	26192919	-0.0259894	0.0717856	-0.515742	1.42453	0.284037	-1.53e-07	7e-08	0.985371
ldscAll	INS Neuronal	Brain	Coronary Artery Disease	26343387	0.0573816	0.0650002	1.1387	1.28988	0.91397	-1.82e-08	1.85e-08	0.837499
ldscAll	PVC Neuronal	Brain	Schizophrenia	25056061	0.132532	0.0234087	3.49281	0.616924	5.68e-05	1.2e-07	4.27e-08	0.00248447
ldscAll	PVC Neuronal	Brain	Alzheimer's Disease	24162737	0.0584191	0.12208	1.5396	3.21736	0.866342	-2.64e-08	3.67e-08	0.76401
ldscAll	PVC Neuronal	Brain	ADHD	-	0.109917	0.049253	2.89682	1.29804	0.1398	5.96e-08	4.51e-08	0.0933964
ldscAll	PVC Neuronal	Brain	Autism	-	0.0798135	0.0559544	2.10344	1.47465	0.451024	1.3e-08	4.57e-08	0.388433
ldscAll	PVC Neuronal	Brain	Education Years	28197077	0.147557	0.025711	3.88878	0.677599	3.06e-05	4.16e-08	1.27e-08	0.00055406
ldscAll	PVC Neuronal	Brain	Subjective Well Being	27089181	0.095665	0.0625174	2.5212	1.64761	0.345036	3.57e-09	6.51e-09	0.291896
ldscAll	PVC Neuronal	Brain	Neuroticism	27089181	0.0440675	0.0433166	1.16138	1.14159	0.886598	-3.97e-09	1.63e-08	0.5963
ldscAll	PVC Neuronal	Brain	Depressive Symptoms	27089181	0.109771	0.0638557	2.89296	1.68288	0.266392	2.59e-09	1.16e-08	0.4115
ldscAll	PVC Neuronal	Brain	Chronotype	27494321	0.0123088	0.039997	0.324391	1.0541	0.522737	-2.62e-08	1.64e-08	0.9451
ldscAll	PVC Neuronal	Brain	Sleep Duration	27494321	0.0228918	0.0550998	0.603301	1.45213	0.785007	-1.98e-09	1.36e-08	0.557779
ldscAll	PVC Neuronal	Brain	BMI	25673413	0.108094	0.0612179	2.84877	1.61337	0.250924	2.68e-08	3.85e-08	0.243546
ldscAll	PVC Neuronal	Brain	Height	25282103	0.0581601	0.0226754	1.53278	0.597597	0.37197	-5.11e-08	3.46e-08	0.93014
ldscAll	PVC Neuronal	Brain	Crohn's Disease	26192919	0.11011	0.0459047	2.90189	1.2098	0.126687	1.83e-08	1.14e-07	0.436261
ldscAll	PVC Neuronal	Brain	Ulcerative Colitis	26192919	-0.000533638	0.0561357	-0.0140637	1.47943	0.493532	-1.33e-07	7.23e-08	0.967353
ldscAll	PVC Neuronal	Brain	Coronary Artery Disease	26343387	0.0459011	0.0524696	1.2097	1.38281	0.878967	-1.64e-08	1.91e-08	0.804424
ldscAll	AMY Neuronal	Brain	Schizophrenia	25056061	0.104865	0.0219925	3.74817	0.786069	0.000466229	1.26e-07	5.41e-08	0.0100169
ldscAll	AMY Neuronal	Brain	Alzheimer's Disease	24162737	0.115072	0.137929	4.11297	4.92995	0.522776	-1.1e-08	5.5e-08	0.579276
ldscAll	AMY Neuronal	Brain	ADHD	-	0.0645268	0.0422262	2.30636	1.50928	0.385063	3.73e-08	5.42e-08	0.245793
ldscAll	AMY Neuronal	Brain	Autism	-	0.0895137	0.0526467	3.19946	1.88173	0.226433	4.14e-08	5.62e-08	0.230507
ldscAll	AMY Neuronal	Brain	Education Years	28197077	0.124654	0.0235953	4.45545	0.843358	6.85e-05	4.95e-08	1.61e-08	0.0010449
ldscAll	AMY Neuronal	Brain	Subjective Well Being	27089181	0.0650032	0.0569071	2.32339	2.03401	0.510917	2.23e-09	8e-09	0.390332
ldscAll	AMY Neuronal	Brain	Neuroticism	27089181	0.0474848	0.0420466	1.69723	1.50286	0.630484	2.82e-09	2.14e-08	0.447685
ldscAll	AMY Neuronal	Brain	Depressive Symptoms	27089181	0.104965	0.057791	3.75174	2.0656	0.190125	5.5e-09	1.46e-08	0.353185
ldscAll	AMY Neuronal	Brain	Chronotype	27494321	0.0489238	0.0379115	1.74867	1.35506	0.580042	-6.24e-09	2.12e-08	0.615846
ldscAll	AMY Neuronal	Brain	Sleep Duration	27494321	0.0712447	0.0492755	2.54648	1.76124	0.377569	1.79e-08	1.75e-08	0.152675
ldscAll	AMY Neuronal	Brain	BMI	25673413	0.0679	0.0320715	2.42693	1.14632	0.213685	1.2e-08	2.75e-08	0.331488
ldscAll	AMY Neuronal	Brain	Height	25282103	0.0845893	0.0240704	3.02345	0.86034	0.018972	1.24e-08	4.97e-08	0.401292
ldscAll	AMY Neuronal	Brain	Crohn's Disease	26192919	0.0314676	0.0446173	1.12474	1.59474	0.937695	-2.48e-07	1.52e-07	0.948815
ldscAll	AMY Neuronal	Brain	Ulcerative Colitis	26192919	-0.053191	0.0539525	-1.90119	1.9284	0.129922	-2.67e-07	9.87e-08	0.99663
ldscAll	AMY Neuronal	Brain	Coronary Artery Disease	26343387	0.0416274	0.0456824	1.48787	1.63281	0.76472	-1.76e-08	2.17e-08	0.791405
ldscAll	HIPP Neuronal	Brain	Schizophrenia	25056061	0.256357	0.0279774	4.31089	0.470466	5.71e-12	1.87e-07	3.31e-08	7.46e-09
ldscAll	HIPP Neuronal	Brain	Alzheimer's Disease	24162737	0.180229	0.187961	3.03073	3.16075	0.518435	-5.32e-09	3.72e-08	0.556866
ldscAll	HIPP Neuronal	Brain	ADHD	-	0.164692	0.0609247	2.76945	1.02451	0.0799261	5.46e-08	3.8e-08	0.0754218
ldscAll	HIPP Neuronal	Brain	Autism	-	0.144827	0.0692211	2.43541	1.16402	0.211073	2.4e-08	3.7e-08	0.258596
ldscAll	HIPP Neuronal	Brain	Education Years	28197077	0.212437	0.0320379	3.57233	0.538749	3.74e-06	3.68e-08	1.06e-08	0.000274151
ldscAll	HIPP Neuronal	Brain	Subjective Well Being	27089181	0.156332	0.0730368	2.62887	1.22818	0.171329	4.02e-09	4.93e-09	0.207503
ldscAll	HIPP Neuronal	Brain	Neuroticism	27089181	0.139998	0.0544511	2.35419	0.915648	0.125948	1.27e-08	1.33e-08	0.17075
ldscAll	HIPP Neuronal	Brain	Depressive Symptoms	27089181	0.205185	0.0778861	3.45039	1.30973	0.0669398	7.51e-09	9.61e-09	0.217242
ldscAll	HIPP Neuronal	Brain	Chronotype	27494321	0.0848071	0.0503646	1.42611	0.846929	0.614249	-7.42e-09	1.38e-08	0.704299
ldscAll	HIPP Neuronal	Brain	Sleep Duration	27494321	0.174406	0.0706099	2.9328	1.18737	0.0991032	2.04e-08	1.16e-08	0.0384684
ldscAll	HIPP Neuronal	Brain	BMI	25673413	0.114951	0.0426376	1.93302	0.716992	0.190082	4.29e-09	1.78e-08	0.404917
ldscAll	HIPP Neuronal	Brain	Height	25282103	0.095104	0.0277276	1.59927	0.466267	0.195649	-4.62e-08	2.89e-08	0.944986
ldscAll	HIPP Neuronal	Brain	Crohn's Disease	26192919	-0.000806557	0.0710304	-0.013563	1.19444	0.386782	-2.8e-07	1.09e-07	0.994853
ldscAll	HIPP Neuronal	Brain	Ulcerative Colitis	26192919	0.0143004	0.0783299	0.240474	1.31719	0.562445	-1.18e-07	6.77e-08	0.959259
ldscAll	HIPP Neuronal	Brain	Coronary Artery Disease	26343387	0.0439003	0.0781961	0.738225	1.31494	0.840957	-2.52e-08	1.84e-08	0.914322
ldscAll	MDT Neuronal	Brain	Schizophrenia	25056061	0.185025	0.0289221	3.44343	0.53826	8.4e-06	1.21e-07	3.87e-08	0.000849668
ldscAll	MDT Neuronal	Brain	Alzheimer's Disease	24162737	0.412086	0.18564	7.66918	3.45487	0.0474472	4.43e-08	3.96e-08	0.131644
ldscAll	MDT Neuronal	Brain	ADHD	-	0.0884113	0.0569991	1.64539	1.06079	0.541678	1.26e-08	3.93e-08	0.374649
ldscAll	MDT Neuronal	Brain	Autism	-	0.211091	0.0593082	3.92853	1.10376	0.00768755	7.4e-08	3.45e-08	0.0159391
ldscAll	MDT Neuronal	Brain	Education Years	28197077	0.158023	0.024904	2.94091	0.463479	5.06e-05	2.41e-08	9.11e-09	0.00407442
ldscAll	MDT Neuronal	Brain	Subjective Well Being	27089181	0.207717	0.0683415	3.86574	1.27188	0.0188091	9.68e-09	4.84e-09	0.0226269
ldscAll	MDT Neuronal	Brain	Neuroticism	27089181	0.161788	0.0396464	3.01098	0.737846	0.0068559	2.4e-08	1.07e-08	0.0125853
ldscAll	MDT Neuronal	Brain	Depressive Symptoms	27089181	0.220221	0.0682759	4.09845	1.27066	0.0168227	1.37e-08	9.22e-09	0.069175
ldscAll	MDT Neuronal	Brain	Chronotype	27494321	0.0684032	0.043082	1.27303	0.801783	0.733246	-1.09e-08	1.31e-08	0.795914
ldscAll	MDT Neuronal	Brain	Sleep Duration	27494321	0.121385	0.063276	2.25906	1.17761	0.286918	1.32e-08	1.14e-08	0.122958
ldscAll	MDT Neuronal	Brain	BMI	25673413	0.174747	0.0525527	3.25216	0.978039	0.0274729	3.72e-08	2.57e-08	0.0737232
ldscAll	MDT Neuronal	Brain	Height	25282103	0.0964865	0.0254861	1.79568	0.474314	0.0932249	-4.1e-08	2.97e-08	0.916194
ldscAll	MDT Neuronal	Brain	Crohn's Disease	26192919	0.0466451	0.0641715	0.868095	1.19427	0.911756	-1.8e-07	1.18e-07	0.936775
ldscAll	MDT Neuronal	Brain	Ulcerative Colitis	26192919	-0.0213762	0.0707668	-0.397826	1.31702	0.282298	-1.54e-07	6.67e-08	0.989615
ldscAll	MDT Neuronal	Brain	Coronary Artery Disease	26343387	0.0156604	0.0662662	0.29145	1.23326	0.559489	-3.29e-08	1.69e-08	0.974142
ldscAll	NAC Neuronal	Brain	Schizophrenia	25056061	0.255607	0.0298704	4.49224	0.524967	7.91e-11	2.06e-07	3.57e-08	4.15e-09
ldscAll	NAC Neuronal	Brain	Alzheimer's Disease	24162737	0.125747	0.13587	2.20998	2.3879	0.60453	-9.64e-09	2.56e-08	0.646922
ldscAll	NAC Neuronal	Brain	ADHD	-	0.241739	0.0574158	4.24851	1.00907	0.000965358	1.08e-07	3.51e-08	0.00106975
ldscAll	NAC Neuronal	Brain	Autism	-	0.174326	0.066932	3.06374	1.17632	0.0755457	4.62e-08	3.62e-08	0.100825
ldscAll	NAC Neuronal	Brain	Education Years	28197077	0.23706	0.0283527	4.16628	0.498293	2.48e-09	5.04e-08	9.52e-09	6.15e-08
ldscAll	NAC Neuronal	Brain	Subjective Well Being	27089181	0.221976	0.0717773	3.90118	1.26147	0.0139956	9.53e-09	4.83e-09	0.0242446
ldscAll	NAC Neuronal	Brain	Neuroticism	27089181	0.195561	0.0509881	3.43695	0.896107	0.00331435	2.98e-08	1.2e-08	0.00665896
ldscAll	NAC Neuronal	Brain	Depressive Symptoms	27089181	0.271158	0.0773356	4.76555	1.35916	0.00672351	1.88e-08	9.5e-09	0.0240463
ldscAll	NAC Neuronal	Brain	Chronotype	27494321	0.13639	0.0483303	2.39703	0.849397	0.0983758	1.14e-08	1.38e-08	0.205319
ldscAll	NAC Neuronal	Brain	Sleep Duration	27494321	0.221139	0.0739717	3.88648	1.30004	0.0243938	2.79e-08	1.2e-08	0.0101192
ldscAll	NAC Neuronal	Brain	BMI	25673413	0.174753	0.0368168	3.07124	0.647048	0.000691537	3.44e-08	1.44e-08	0.00851866
ldscAll	NAC Neuronal	Brain	Height	25282103	0.0191075	0.0265667	0.33581	0.466904	0.15693	-1.08e-07	2.88e-08	0.999909
ldscAll	NAC Neuronal	Brain	Crohn's Disease	26192919	0.0675393	0.0577977	1.18699	1.01578	0.853909	-1.21e-07	9.56e-08	0.897896
ldscAll	NAC Neuronal	Brain	Ulcerative Colitis	26192919	0.0375239	0.0698251	0.659475	1.22716	0.781236	-8.32e-08	6.06e-08	0.915223
ldscAll	NAC Neuronal	Brain	Coronary Artery Disease	26343387	0.133032	0.0723052	2.33801	1.27075	0.287583	6.87e-09	1.86e-08	0.356007
ldscAll	PUT Neuronal	Brain	Schizophrenia	25056061	0.271044	0.031273	3.61411	0.416996	1.09e-09	1.46e-07	3.04e-08	7.58e-07
ldscAll	PUT Neuronal	Brain	Alzheimer's Disease	24162737	0.156264	0.160402	2.08363	2.1388	0.607233	-1.23e-08	2.44e-08	0.693446
ldscAll	PUT Neuronal	Brain	ADHD	-	0.267174	0.0639111	3.56251	0.852194	0.00202573	8.68e-08	3.05e-08	0.00219618
ldscAll	PUT Neuronal	Brain	Autism	-	0.109014	0.070359	1.4536	0.938171	0.627798	-4.52e-09	3.03e-08	0.559394
ldscAll	PUT Neuronal	Brain	Education Years	28197077	0.275678	0.0324395	3.67591	0.432551	5.31e-09	4.2e-08	8.44e-09	3.13e-07
ldscAll	PUT Neuronal	Brain	Subjective Well Being	27089181	0.276002	0.0835145	3.68022	1.11359	0.00904926	9.09e-09	4.23e-09	0.0157439
ldscAll	PUT Neuronal	Brain	Neuroticism	27089181	0.216852	0.0563984	2.89151	0.752018	0.00575025	2.25e-08	1.04e-08	0.0155758
ldscAll	PUT Neuronal	Brain	Depressive Symptoms	27089181	0.306486	0.0807993	4.0867	1.07738	0.00472414	1.5e-08	7.62e-09	0.0248666
ldscAll	PUT Neuronal	Brain	Chronotype	27494321	0.104207	0.0507823	1.3895	0.677133	0.56453	-6.2e-09	1.12e-08	0.709379
ldscAll	PUT Neuronal	Brain	Sleep Duration	27494321	0.253018	0.0753665	3.37375	1.00494	0.0180797	2.36e-08	9.6e-09	0.00704963
ldscAll	PUT Neuronal	Brain	BMI	25673413	0.184335	0.0411198	2.45793	0.548293	0.00512954	2e-08	1.27e-08	0.0571378
ldscAll	PUT Neuronal	Brain	Height	25282103	0.0575792	0.0289606	0.767764	0.386162	0.548305	-8.62e-08	2.48e-08	0.999744
ldscAll	PUT Neuronal	Brain	Crohn's Disease	26192919	0.111159	0.0662206	1.48219	0.882988	0.587428	-7.85e-08	8.54e-08	0.820904
ldscAll	PUT Neuronal	Brain	Ulcerative Colitis	26192919	0.0909565	0.0786858	1.21282	1.0492	0.839584	-5.05e-08	5.4e-08	0.825304
ldscAll	PUT Neuronal	Brain	Coronary Artery Disease	26343387	0.200057	0.0931813	2.66758	1.24248	0.176931	1.01e-08	1.84e-08	0.291008
ldscAll	DLPFC non-Neuronal	Brain	Schizophrenia	25056061	0.0799691	0.0236916	2.34366	0.694331	0.0511687	-1.92e-09	5.2e-08	0.514758
ldscAll	DLPFC non-Neuronal	Brain	Alzheimer's Disease	24162737	0.239059	0.147655	7.00611	4.32734	0.159356	-2.71e-09	4.77e-08	0.522655
ldscAll	DLPFC non-Neuronal	Brain	ADHD	-	0.08517	0.0450434	2.49609	1.32009	0.256189	4.34e-08	4.61e-08	0.173044
ldscAll	DLPFC non-Neuronal	Brain	Autism	-	0.137665	0.0565799	4.03455	1.65819	0.0674846	7.3e-08	5.59e-08	0.0956874
ldscAll	DLPFC non-Neuronal	Brain	Education Years	28197077	0.140462	0.0231868	4.11654	0.679539	6.15e-06	4.12e-08	1.31e-08	0.000841769
ldscAll	DLPFC non-Neuronal	Brain	Subjective Well Being	27089181	0.127457	0.0584333	3.73539	1.71251	0.103931	7.62e-09	7.1e-09	0.141379
ldscAll	DLPFC non-Neuronal	Brain	Neuroticism	27089181	0.0838653	0.0415465	2.45785	1.21761	0.230708	1.5e-08	1.85e-08	0.208691
ldscAll	DLPFC non-Neuronal	Brain	Depressive Symptoms	27089181	0.170072	0.0670338	4.98431	1.96456	0.0475438	1.48e-08	1.5e-08	0.161799
ldscAll	DLPFC non-Neuronal	Brain	Chronotype	27494321	0.0910136	0.0412114	2.66735	1.20779	0.167288	4.5e-09	2.14e-08	0.416906
ldscAll	DLPFC non-Neuronal	Brain	Sleep Duration	27494321	0.038555	0.0624066	1.12994	1.82896	0.943258	4.76e-09	1.9e-08	0.401118
ldscAll	DLPFC non-Neuronal	Brain	BMI	25673413	0.0757534	0.0281918	2.22011	0.82622	0.133647	-1.11e-09	2.05e-08	0.521546
ldscAll	DLPFC non-Neuronal	Brain	Height	25282103	0.0983091	0.0265018	2.88115	0.776692	0.0152284	-4.11e-08	4.89e-08	0.799321
ldscAll	DLPFC non-Neuronal	Brain	Crohn's Disease	26192919	0.0587843	0.0517938	1.7228	1.51793	0.633796	-2.92e-07	1.49e-07	0.974543
ldscAll	DLPFC non-Neuronal	Brain	Ulcerative Colitis	26192919	-0.00472574	0.0666198	-0.138498	1.95243	0.557151	-2.44e-07	1.05e-07	0.99024
ldscAll	DLPFC non-Neuronal	Brain	Coronary Artery Disease	26343387	0.0906332	0.0481554	2.6562	1.41129	0.242406	-1.18e-08	2.34e-08	0.693208
ldscAll	OFC non-Neuronal	Brain	Schizophrenia	25056061	0.0692956	0.0234355	2.02271	0.684073	0.131994	-3.39e-08	5.09e-08	0.747209
ldscAll	OFC non-Neuronal	Brain	Alzheimer's Disease	24162737	0.278232	0.145302	8.12148	4.2413	0.0865875	1.28e-08	4.55e-08	0.389302
ldscAll	OFC non-Neuronal	Brain	ADHD	-	0.102326	0.0448346	2.98687	1.3087	0.129984	6.03e-08	4.63e-08	0.096303
ldscAll	OFC non-Neuronal	Brain	Autism	-	0.124608	0.0552872	3.63725	1.61381	0.104329	5.55e-08	5.27e-08	0.145829
ldscAll	OFC non-Neuronal	Brain	Education Years	28197077	0.132145	0.0235411	3.85726	0.687157	4.74e-05	3.42e-08	1.35e-08	0.00577148
ldscAll	OFC non-Neuronal	Brain	Subjective Well Being	27089181	0.103787	0.0575824	3.02951	1.68081	0.218934	3.83e-09	6.92e-09	0.289903
ldscAll	OFC non-Neuronal	Brain	Neuroticism	27089181	0.0869154	0.0396063	2.53703	1.15609	0.184782	1.53e-08	1.74e-08	0.18932
ldscAll	OFC non-Neuronal	Brain	Depressive Symptoms	27089181	0.155176	0.0614779	4.52952	1.79451	0.0544342	1.01e-08	1.37e-08	0.228837
ldscAll	OFC non-Neuronal	Brain	Chronotype	27494321	0.0730971	0.0400578	2.13367	1.16927	0.331773	-6.15e-09	2.02e-08	0.619568
ldscAll	OFC non-Neuronal	Brain	Sleep Duration	27494321	0.0282882	0.0579838	0.82572	1.69252	0.917926	8.34e-10	1.74e-08	0.480911
ldscAll	OFC non-Neuronal	Brain	BMI	25673413	0.0737036	0.0257151	2.15138	0.750615	0.113241	-4.5e-09	1.93e-08	0.592049
ldscAll	OFC non-Neuronal	Brain	Height	25282103	0.124432	0.0254556	3.63212	0.743039	0.000461652	6.67e-09	4.71e-08	0.443778
ldscAll	OFC non-Neuronal	Brain	Crohn's Disease	26192919	0.0352121	0.0558125	1.02783	1.62914	0.986263	-3.79e-07	1.7e-07	0.987146
ldscAll	OFC non-Neuronal	Brain	Ulcerative Colitis	26192919	-0.0264086	0.066465	-0.770856	1.94009	0.353149	-2.83e-07	1.02e-07	0.997148
ldscAll	OFC non-Neuronal	Brain	Coronary Artery Disease	26343387	0.0915997	0.0505214	2.67376	1.4747	0.26	-1.33e-08	2.49e-08	0.703872
ldscAll	VLPFC non-Neuronal	Brain	Schizophrenia	25056061	0.0670466	0.0232262	2.01194	0.696973	0.143492	-3.4e-08	5.13e-08	0.746226
ldscAll	VLPFC non-Neuronal	Brain	Alzheimer's Disease	24162737	0.0868083	0.137284	2.60495	4.11962	0.696263	-5.91e-08	4.59e-08	0.901097
ldscAll	VLPFC non-Neuronal	Brain	ADHD	-	0.121158	0.0473072	3.63573	1.4196	0.0641728	8.74e-08	5.12e-08	0.0440824
ldscAll	VLPFC non-Neuronal	Brain	Autism	-	0.109237	0.0551102	3.27801	1.65375	0.172504	4.29e-08	5.58e-08	0.221248
ldscAll	VLPFC non-Neuronal	Brain	Education Years	28197077	0.131943	0.0233828	3.95936	0.701675	2.65e-05	3.63e-08	1.36e-08	0.00371697
ldscAll	VLPFC non-Neuronal	Brain	Subjective Well Being	27089181	0.0652395	0.0544116	1.95771	1.63279	0.554296	-1.08e-09	6.72e-09	0.563956
ldscAll	VLPFC non-Neuronal	Brain	Neuroticism	27089181	0.0802911	0.0385275	2.40938	1.15614	0.220584	1.33e-08	1.7e-08	0.216944
ldscAll	VLPFC non-Neuronal	Brain	Depressive Symptoms	27089181	0.197061	0.0589817	5.91342	1.76993	0.006363	2.12e-08	1.32e-08	0.0545432
ldscAll	VLPFC non-Neuronal	Brain	Chronotype	27494321	0.100725	0.0397752	3.02255	1.19358	0.0893284	1.03e-08	2.05e-08	0.307712
ldscAll	VLPFC non-Neuronal	Brain	Sleep Duration	27494321	0.0262491	0.0598035	0.787686	1.79459	0.905769	4.95e-10	1.85e-08	0.489336
ldscAll	VLPFC non-Neuronal	Brain	BMI	25673413	0.0852574	0.0263735	2.55841	0.791417	0.0470651	6.61e-09	2.09e-08	0.375921
ldscAll	VLPFC non-Neuronal	Brain	Height	25282103	0.109761	0.0249156	3.29373	0.747671	0.00228574	-1.72e-08	4.79e-08	0.640406
ldscAll	VLPFC non-Neuronal	Brain	Crohn's Disease	26192919	-0.00103492	0.0529632	-0.031056	1.58932	0.513913	-5.05e-07	1.67e-07	0.998733
ldscAll	VLPFC non-Neuronal	Brain	Ulcerative Colitis	26192919	-0.0609023	0.0670402	-1.82756	2.01175	0.148365	-3.43e-07	1.04e-07	0.999495
ldscAll	VLPFC non-Neuronal	Brain	Coronary Artery Disease	26343387	0.115696	0.0542702	3.47183	1.62855	0.133937	8.21e-10	2.82e-08	0.488375
ldscAll	ACC non-Neuronal	Brain	Schizophrenia	25056061	0.0640767	0.022619	2.07742	0.733329	0.139819	-2.72e-08	5.47e-08	0.690752
ldscAll	ACC non-Neuronal	Brain	Alzheimer's Disease	24162737	0.239543	0.137665	7.7662	4.46322	0.119603	5.34e-09	4.83e-08	0.455995
ldscAll	ACC non-Neuronal	Brain	ADHD	-	0.0624242	0.0437805	2.02385	1.4194	0.472297	2.23e-08	5.07e-08	0.330305
ldscAll	ACC non-Neuronal	Brain	Autism	-	0.0798612	0.0529127	2.58917	1.71547	0.356024	1.9e-08	5.67e-08	0.368919
ldscAll	ACC non-Neuronal	Brain	Education Years	28197077	0.120805	0.0219339	3.91661	0.711116	4.91e-05	3.53e-08	1.37e-08	0.0048999
ldscAll	ACC non-Neuronal	Brain	Subjective Well Being	27089181	0.0722022	0.0545271	2.34086	1.76782	0.441271	8.87e-10	7.26e-09	0.451366
ldscAll	ACC non-Neuronal	Brain	Neuroticism	27089181	0.0586656	0.0355755	1.90199	1.15339	0.430347	5.76e-09	1.7e-08	0.367213
ldscAll	ACC non-Neuronal	Brain	Depressive Symptoms	27089181	0.134966	0.057149	4.37571	1.85282	0.0751123	8.76e-09	1.4e-08	0.265791
ldscAll	ACC non-Neuronal	Brain	Chronotype	27494321	0.0807326	0.0397101	2.61742	1.28744	0.208265	2.35e-09	2.19e-08	0.457262
ldscAll	ACC non-Neuronal	Brain	Sleep Duration	27494321	-0.00806721	0.0572491	-0.261546	1.85607	0.497518	-9.87e-09	1.9e-08	0.698334
ldscAll	ACC non-Neuronal	Brain	BMI	25673413	0.0622336	0.0223172	2.01767	0.723544	0.150237	-6.9e-09	1.75e-08	0.65352
ldscAll	ACC non-Neuronal	Brain	Height	25282103	0.0982123	0.0255135	3.18413	0.827168	0.00815957	-2.44e-08	5.17e-08	0.681549
ldscAll	ACC non-Neuronal	Brain	Crohn's Disease	26192919	-0.00121475	0.050557	-0.0393832	1.6391	0.522838	-4.89e-07	1.64e-07	0.998551
ldscAll	ACC non-Neuronal	Brain	Ulcerative Colitis	26192919	-0.0383662	0.0646823	-1.24386	2.09706	0.278058	-3.03e-07	1.12e-07	0.996671
ldscAll	ACC non-Neuronal	Brain	Coronary Artery Disease	26343387	0.0763741	0.0485447	2.47612	1.57386	0.347996	-1.5e-08	2.65e-08	0.714431
ldscAll	STC non-Neuronal	Brain	Schizophrenia	25056061	0.0577294	0.0238651	1.75568	0.725789	0.295555	-5.71e-08	5.48e-08	0.851274
ldscAll	STC non-Neuronal	Brain	Alzheimer's Disease	24162737	0.231381	0.147197	7.03679	4.47657	0.164321	-8.99e-09	4.62e-08	0.577163
ldscAll	STC non-Neuronal	Brain	ADHD	-	0.0786241	0.0436546	2.39113	1.32763	0.296746	3.92e-08	4.79e-08	0.206231
ldscAll	STC non-Neuronal	Brain	Autism	-	0.0966992	0.0538374	2.94083	1.63731	0.238134	3.36e-08	5.62e-08	0.275152
ldscAll	STC non-Neuronal	Brain	Education Years	28197077	0.12771	0.0221885	3.88395	0.6748	2.4e-05	3.55e-08	1.32e-08	0.00363136
ldscAll	STC non-Neuronal	Brain	Subjective Well Being	27089181	0.155562	0.0581162	4.73097	1.76744	0.0279472	1.24e-08	7.21e-09	0.0425386
ldscAll	STC non-Neuronal	Brain	Neuroticism	27089181	0.0966823	0.0377595	2.94032	1.14835	0.0918997	2.31e-08	1.73e-08	0.0911565
ldscAll	STC non-Neuronal	Brain	Depressive Symptoms	27089181	0.195923	0.0609246	5.95845	1.85285	0.00922017	2.29e-08	1.44e-08	0.0556508
ldscAll	STC non-Neuronal	Brain	Chronotype	27494321	0.0970742	0.0400169	2.95224	1.217	0.107589	8.4e-09	2.15e-08	0.347977
ldscAll	STC non-Neuronal	Brain	Sleep Duration	27494321	0.0368197	0.0614419	1.11977	1.86858	0.948813	4.79e-09	1.92e-08	0.401691
ldscAll	STC non-Neuronal	Brain	BMI	25673413	0.0892836	0.0269103	2.7153	0.818399	0.0337641	1.05e-08	2.24e-08	0.319404
ldscAll	STC non-Neuronal	Brain	Height	25282103	0.104431	0.0264851	3.17599	0.805469	0.00713983	-3.3e-08	5.15e-08	0.739107
ldscAll	STC non-Neuronal	Brain	Crohn's Disease	26192919	0.0380622	0.0509589	1.15755	1.54977	0.918543	-3.77e-07	1.64e-07	0.989345
ldscAll	STC non-Neuronal	Brain	Ulcerative Colitis	26192919	-0.0511523	0.0655211	-1.55565	1.99264	0.191721	-3.37e-07	1.08e-07	0.999092
ldscAll	STC non-Neuronal	Brain	Coronary Artery Disease	26343387	0.0544986	0.0471248	1.65742	1.43317	0.646552	-3.19e-08	2.44e-08	0.904266
ldscAll	ITC non-Neuronal	Brain	Schizophrenia	25056061	0.0736174	0.0235087	2.42473	0.774303	0.0651708	-2.29e-09	5.76e-08	0.51583
ldscAll	ITC non-Neuronal	Brain	Alzheimer's Disease	24162737	0.233237	0.140281	7.68211	4.62043	0.135133	8.51e-10	4.85e-08	0.492999
ldscAll	ITC non-Neuronal	Brain	ADHD	-	0.0781625	0.0423545	2.57443	1.39503	0.259112	4.51e-08	4.84e-08	0.175708
ldscAll	ITC non-Neuronal	Brain	Autism	-	0.177688	0.0561611	5.85249	1.84977	0.00974744	1.34e-07	6e-08	0.0125702
ldscAll	ITC non-Neuronal	Brain	Education Years	28197077	0.119927	0.0219412	3.95002	0.722676	4.74e-05	3.56e-08	1.38e-08	0.0050665
ldscAll	ITC non-Neuronal	Brain	Subjective Well Being	27089181	0.0829192	0.0589059	2.7311	1.94018	0.366614	2.58e-09	8.14e-09	0.375601
ldscAll	ITC non-Neuronal	Brain	Neuroticism	27089181	0.0587576	0.0379475	1.93529	1.24987	0.458411	6.13e-09	1.89e-08	0.373048
ldscAll	ITC non-Neuronal	Brain	Depressive Symptoms	27089181	0.123338	0.0589552	4.06236	1.9418	0.122167	4.89e-09	1.52e-08	0.373556
ldscAll	ITC non-Neuronal	Brain	Chronotype	27494321	0.125359	0.0409287	4.12895	1.34807	0.0190909	3.03e-08	2.25e-08	0.0893961
ldscAll	ITC non-Neuronal	Brain	Sleep Duration	27494321	0.00767673	0.0558983	0.252848	1.84112	0.684473	-4.62e-09	1.9e-08	0.596233
ldscAll	ITC non-Neuronal	Brain	BMI	25673413	0.0773103	0.0260063	2.54636	0.856568	0.0655964	5.81e-09	2.17e-08	0.394397
ldscAll	ITC non-Neuronal	Brain	Height	25282103	0.116474	0.0251021	3.83629	0.826783	0.000663297	1.45e-08	4.99e-08	0.385812
ldscAll	ITC non-Neuronal	Brain	Crohn's Disease	26192919	0.040838	0.0471724	1.34508	1.55371	0.823233	-3.75e-07	1.69e-07	0.986737
ldscAll	ITC non-Neuronal	Brain	Ulcerative Colitis	26192919	0.0262296	0.0641913	0.863922	2.11426	0.94852	-2.07e-07	1.12e-07	0.968069
ldscAll	ITC non-Neuronal	Brain	Coronary Artery Disease	26343387	0.123348	0.0491306	4.06271	1.61821	0.0615679	1.07e-08	2.73e-08	0.347069
ldscAll	PMC non-Neuronal	Brain	Schizophrenia	25056061	0.074073	0.0231943	2.19	0.685749	0.0817389	-2.1e-08	5.19e-08	0.657008
ldscAll	PMC non-Neuronal	Brain	Alzheimer's Disease	24162737	0.341573	0.154034	10.0987	4.55408	0.0312676	3.49e-08	4.62e-08	0.225038
ldscAll	PMC non-Neuronal	Brain	ADHD	-	0.0783849	0.0440904	2.31748	1.30355	0.313481	3.43e-08	4.66e-08	0.230686
ldscAll	PMC non-Neuronal	Brain	Autism	-	0.133946	0.054844	3.96016	1.62149	0.0727657	6.91e-08	5.5e-08	0.104553
ldscAll	PMC non-Neuronal	Brain	Education Years	28197077	0.145095	0.0235084	4.2898	0.695036	3.54e-06	4.44e-08	1.35e-08	0.000495825
ldscAll	PMC non-Neuronal	Brain	Subjective Well Being	27089181	0.120459	0.0586472	3.56142	1.73393	0.129703	6.54e-09	7.25e-09	0.183752
ldscAll	PMC non-Neuronal	Brain	Neuroticism	27089181	0.0868011	0.0394029	2.56631	1.16496	0.183127	1.63e-08	1.78e-08	0.178934
ldscAll	PMC non-Neuronal	Brain	Depressive Symptoms	27089181	0.157995	0.0600093	4.67119	1.7742	0.0448508	1.15e-08	1.4e-08	0.206226
ldscAll	PMC non-Neuronal	Brain	Chronotype	27494321	0.0781307	0.0397748	2.30997	1.17596	0.265191	-3.03e-09	2.06e-08	0.558507
ldscAll	PMC non-Neuronal	Brain	Sleep Duration	27494321	0.0500201	0.058429	1.47887	1.72748	0.781208	8.18e-09	1.75e-08	0.320546
ldscAll	PMC non-Neuronal	Brain	BMI	25673413	0.0618486	0.0241475	1.82858	0.713932	0.233563	-1.33e-08	1.86e-08	0.762732
ldscAll	PMC non-Neuronal	Brain	Height	25282103	0.121568	0.0264688	3.5942	0.782562	0.00102895	-1.82e-11	4.89e-08	0.500149
ldscAll	PMC non-Neuronal	Brain	Crohn's Disease	26192919	-0.00530232	0.0498235	-0.156766	1.47305	0.429192	-5.25e-07	1.55e-07	0.999637
ldscAll	PMC non-Neuronal	Brain	Ulcerative Colitis	26192919	-0.0323682	0.0664283	-0.956981	1.96398	0.31167	-3e-07	1.08e-07	0.997274
ldscAll	PMC non-Neuronal	Brain	Coronary Artery Disease	26343387	0.1126	0.0495184	3.32907	1.46403	0.114456	-2.82e-09	2.49e-08	0.545099
ldscAll	INS non-Neuronal	Brain	Schizophrenia	25056061	0.0330226	0.0179531	1.62228	0.881969	0.479159	-7.46e-08	6.55e-08	0.872724
ldscAll	INS non-Neuronal	Brain	Alzheimer's Disease	24162737	0.094685	0.119468	4.65153	5.869	0.530263	-4.51e-08	6.26e-08	0.764519
ldscAll	INS non-Neuronal	Brain	ADHD	-	0.0474213	0.0368563	2.32963	1.81061	0.462217	3.21e-08	6.31e-08	0.305281
ldscAll	INS non-Neuronal	Brain	Autism	-	0.0392253	0.0427184	1.927	2.09859	0.659611	-1.17e-08	6.71e-08	0.569277
ldscAll	INS non-Neuronal	Brain	Education Years	28197077	0.0842078	0.0197958	4.13682	0.972492	0.00130677	3.5e-08	1.8e-08	0.02606
ldscAll	INS non-Neuronal	Brain	Subjective Well Being	27089181	0.0489279	0.0483506	2.40365	2.37528	0.550619	8.28e-10	9.33e-09	0.464644
ldscAll	INS non-Neuronal	Brain	Neuroticism	27089181	0.0419668	0.0324825	2.06167	1.59575	0.500264	8.13e-09	2.32e-08	0.36323
ldscAll	INS non-Neuronal	Brain	Depressive Symptoms	27089181	0.0541783	0.049244	2.66158	2.41918	0.494427	-9.32e-09	1.78e-08	0.699623
ldscAll	INS non-Neuronal	Brain	Chronotype	27494321	0.0763876	0.0317119	3.75264	1.55789	0.0749709	1.78e-08	2.49e-08	0.236601
ldscAll	INS non-Neuronal	Brain	Sleep Duration	27494321	-0.0367603	0.0465176	-1.8059	2.28524	0.219332	-2.35e-08	2.26e-08	0.850077
ldscAll	INS non-Neuronal	Brain	BMI	25673413	0.0380496	0.020313	1.86924	0.997901	0.382006	-1.36e-08	2.38e-08	0.715285
ldscAll	INS non-Neuronal	Brain	Height	25282103	0.0707006	0.0205602	3.47326	1.01005	0.013695	-2.6e-08	5.79e-08	0.673208
ldscAll	INS non-Neuronal	Brain	Crohn's Disease	26192919	-0.000560036	0.0397259	-0.0275125	1.95159	0.598629	-5.53e-07	2.09e-07	0.995867
ldscAll	INS non-Neuronal	Brain	Ulcerative Colitis	26192919	-0.0374907	0.0481097	-1.84178	2.36345	0.229347	-3.62e-07	1.29e-07	0.997466
ldscAll	INS non-Neuronal	Brain	Coronary Artery Disease	26343387	0.0488939	0.0459213	2.40198	2.25594	0.53397	-1.67e-08	3.88e-08	0.66653
ldscAll	PVC non-Neuronal	Brain	Schizophrenia	25056061	0.0985801	0.0258745	2.74842	0.721383	0.01463	2.67e-08	5.35e-08	0.308915
ldscAll	PVC non-Neuronal	Brain	Alzheimer's Disease	24162737	0.199281	0.145593	5.55595	4.05913	0.25211	-2.26e-08	4.5e-08	0.692119
ldscAll	PVC non-Neuronal	Brain	ADHD	-	0.0714952	0.0470583	1.99329	1.31199	0.450342	2.14e-08	4.65e-08	0.3226
ldscAll	PVC non-Neuronal	Brain	Autism	-	0.127623	0.0550809	3.55812	1.53566	0.106453	5.59e-08	5.27e-08	0.144595
ldscAll	PVC non-Neuronal	Brain	Education Years	28197077	0.14321	0.0248765	3.9927	0.693558	1.88e-05	3.85e-08	1.35e-08	0.00224507
ldscAll	PVC non-Neuronal	Brain	Subjective Well Being	27089181	0.0988408	0.0604053	2.75568	1.6841	0.290152	2.81e-09	7.12e-09	0.346613
ldscAll	PVC non-Neuronal	Brain	Neuroticism	27089181	0.102481	0.0400546	2.85716	1.11672	0.102377	2.13e-08	1.7e-08	0.104757
ldscAll	PVC non-Neuronal	Brain	Depressive Symptoms	27089181	0.209235	0.0640133	5.83348	1.78469	0.00867299	2.19e-08	1.38e-08	0.0557335
ldscAll	PVC non-Neuronal	Brain	Chronotype	27494321	0.119569	0.0418575	3.33359	1.16699	0.0456076	1.68e-08	2.05e-08	0.206712
ldscAll	PVC non-Neuronal	Brain	Sleep Duration	27494321	0.0243861	0.0628274	0.679885	1.75163	0.854776	-1.15e-09	1.82e-08	0.525326
ldscAll	PVC non-Neuronal	Brain	BMI	25673413	0.0909316	0.0255967	2.53517	0.713637	0.0285661	6.27e-09	1.92e-08	0.371806
ldscAll	PVC non-Neuronal	Brain	Height	25282103	0.1114	0.026606	3.10583	0.741777	0.00432268	-3.06e-08	4.84e-08	0.736302
ldscAll	PVC non-Neuronal	Brain	Crohn's Disease	26192919	0.0120366	0.0513433	0.335579	1.43145	0.640018	-4.55e-07	1.52e-07	0.998633
ldscAll	PVC non-Neuronal	Brain	Ulcerative Colitis	26192919	-0.0437534	0.0672123	-1.21984	1.87388	0.232071	-3.11e-07	1.05e-07	0.99839
ldscAll	PVC non-Neuronal	Brain	Coronary Artery Disease	26343387	0.107265	0.0495765	2.99055	1.3822	0.15593	-7.87e-09	2.35e-08	0.631327
ldscAll	AMY non-Neuronal	Brain	Schizophrenia	25056061	0.0501474	0.0195852	2.15649	0.842224	0.167137	-3.46e-08	6.12e-08	0.713983
ldscAll	AMY non-Neuronal	Brain	Alzheimer's Disease	24162737	0.0776959	0.126594	3.34116	5.44391	0.667916	-6.86e-08	6.29e-08	0.862237
ldscAll	AMY non-Neuronal	Brain	ADHD	-	0.050753	0.0383033	2.18253	1.64716	0.473808	2.99e-08	5.99e-08	0.309234
ldscAll	AMY non-Neuronal	Brain	Autism	-	0.0518677	0.0501721	2.23047	2.15755	0.571164	1.52e-09	7.2e-08	0.491561
ldscAll	AMY non-Neuronal	Brain	Education Years	28197077	0.0884908	0.0212975	3.80538	0.915859	0.00218313	2.92e-08	1.7e-08	0.0432859
ldscAll	AMY non-Neuronal	Brain	Subjective Well Being	27089181	0.0605029	0.0515851	2.60181	2.21832	0.464006	2.19e-09	9.15e-09	0.405261
ldscAll	AMY non-Neuronal	Brain	Neuroticism	27089181	0.0507204	0.0320617	2.18113	1.37875	0.392489	1.03e-08	2.04e-08	0.306278
ldscAll	AMY non-Neuronal	Brain	Depressive Symptoms	27089181	0.0876733	0.0542843	3.77022	2.33439	0.240535	-3.49e-10	1.77e-08	0.507857
ldscAll	AMY non-Neuronal	Brain	Chronotype	27494321	0.080164	0.0330851	3.4473	1.42276	0.0839894	1.26e-08	2.43e-08	0.301569
ldscAll	AMY non-Neuronal	Brain	Sleep Duration	27494321	-0.00769525	0.0480181	-0.33092	2.06493	0.519439	-9e-09	2.14e-08	0.663115
ldscAll	AMY non-Neuronal	Brain	BMI	25673413	0.0466344	0.0195004	2.00542	0.838577	0.22524	-1.11e-08	2.13e-08	0.699265
ldscAll	AMY non-Neuronal	Brain	Height	25282103	0.0660028	0.0218363	2.83832	0.939029	0.0489804	-7.7e-08	5.78e-08	0.908724
ldscAll	AMY non-Neuronal	Brain	Crohn's Disease	26192919	-0.00395345	0.0447378	-0.170011	1.92386	0.538702	-6.04e-07	1.92e-07	0.999158
ldscAll	AMY non-Neuronal	Brain	Ulcerative Colitis	26192919	-0.0377004	0.053816	-1.62123	2.31425	0.251511	-3.69e-07	1.3e-07	0.997764
ldscAll	AMY non-Neuronal	Brain	Coronary Artery Disease	26343387	0.0505763	0.0426704	2.17494	1.83496	0.521714	-2.27e-08	2.96e-08	0.777647
ldscAll	HIPP non-Neuronal	Brain	Schizophrenia	25056061	0.0889639	0.0262035	2.29516	0.676018	0.0533629	-6.12e-09	5.01e-08	0.548594
ldscAll	HIPP non-Neuronal	Brain	Alzheimer's Disease	24162737	0.208988	0.146092	5.39164	3.76899	0.241578	-1.52e-08	4.1e-08	0.644369
ldscAll	HIPP non-Neuronal	Brain	ADHD	-	0.101916	0.0477533	2.62931	1.23198	0.187789	4.57e-08	4.33e-08	0.14597
ldscAll	HIPP non-Neuronal	Brain	Autism	-	0.116629	0.0593559	3.00888	1.53131	0.197416	3.53e-08	5.04e-08	0.241857
ldscAll	HIPP non-Neuronal	Brain	Education Years	28197077	0.123787	0.0236787	3.19356	0.610882	0.000416156	2.04e-08	1.17e-08	0.0404433
ldscAll	HIPP non-Neuronal	Brain	Subjective Well Being	27089181	0.116152	0.0612405	2.99658	1.57993	0.197226	3.88e-09	6.5e-09	0.275012
ldscAll	HIPP non-Neuronal	Brain	Neuroticism	27089181	0.111287	0.0403135	2.87108	1.04004	0.0740767	2.07e-08	1.55e-08	0.0901129
ldscAll	HIPP non-Neuronal	Brain	Depressive Symptoms	27089181	0.145494	0.0638814	3.75357	1.64806	0.101318	4.74e-09	1.23e-08	0.350312
ldscAll	HIPP non-Neuronal	Brain	Chronotype	27494321	0.0993653	0.0403704	2.5635	1.04151	0.131703	3.89e-09	1.79e-08	0.413994
ldscAll	HIPP non-Neuronal	Brain	Sleep Duration	27494321	-0.0163905	0.0592985	-0.422854	1.52983	0.35124	-1.37e-08	1.58e-08	0.807363
ldscAll	HIPP non-Neuronal	Brain	BMI	25673413	0.0868184	0.0267477	2.23981	0.690059	0.0682863	-4.03e-10	1.82e-08	0.508864
ldscAll	HIPP non-Neuronal	Brain	Height	25282103	0.127669	0.0254892	3.29371	0.657591	0.000526146	-6.46e-09	4.19e-08	0.561284
ldscAll	HIPP non-Neuronal	Brain	Crohn's Disease	26192919	0.0180239	0.0548693	0.464995	1.41556	0.703325	-4.13e-07	1.44e-07	0.997926
ldscAll	HIPP non-Neuronal	Brain	Ulcerative Colitis	26192919	-0.0215155	0.065043	-0.555074	1.67803	0.343908	-2.58e-07	8.94e-08	0.998057
ldscAll	HIPP non-Neuronal	Brain	Coronary Artery Disease	26343387	0.119969	0.0502778	3.09505	1.29711	0.106312	-5.15e-09	2.15e-08	0.594587
ldscAll	MDT non-Neuronal	Brain	Schizophrenia	25056061	0.116622	0.0256498	2.74649	0.604062	0.00380909	3.63e-08	4.76e-08	0.22293
ldscAll	MDT non-Neuronal	Brain	Alzheimer's Disease	24162737	0.21474	0.142432	5.05721	3.35433	0.230638	-2.58e-08	3.99e-08	0.741454
ldscAll	MDT non-Neuronal	Brain	ADHD	-	0.106753	0.0479281	2.51407	1.12873	0.181493	4.67e-08	4.11e-08	0.128099
ldscAll	MDT non-Neuronal	Brain	Autism	-	0.103937	0.0576543	2.44776	1.35778	0.2921	2.18e-08	4.79e-08	0.324275
ldscAll	MDT non-Neuronal	Brain	Education Years	28197077	0.159892	0.024205	3.76552	0.570037	1.71e-06	3.67e-08	1.13e-08	0.000579526
ldscAll	MDT non-Neuronal	Brain	Subjective Well Being	27089181	0.157451	0.062677	3.70804	1.47607	0.0609877	8.06e-09	6.28e-09	0.0994805
ldscAll	MDT non-Neuronal	Brain	Neuroticism	27089181	0.0959987	0.042153	2.26081	0.99272	0.210435	1.22e-08	1.51e-08	0.209683
ldscAll	MDT non-Neuronal	Brain	Depressive Symptoms	27089181	0.200221	0.0700104	4.71529	1.64877	0.0285513	1.62e-08	1.3e-08	0.106749
ldscAll	MDT non-Neuronal	Brain	Chronotype	27494321	0.0798088	0.0420569	1.87953	0.990456	0.374103	-9.15e-09	1.79e-08	0.694879
ldscAll	MDT non-Neuronal	Brain	Sleep Duration	27494321	0.0511935	0.0635912	1.20563	1.4976	0.890695	4.71e-09	1.55e-08	0.380987
ldscAll	MDT non-Neuronal	Brain	BMI	25673413	0.121728	0.0232796	2.86674	0.548243	0.00143976	1.77e-08	1.59e-08	0.132227
ldscAll	MDT non-Neuronal	Brain	Height	25282103	0.120403	0.0272795	2.83553	0.642444	0.00428642	-4.16e-08	4.19e-08	0.839924
ldscAll	MDT non-Neuronal	Brain	Crohn's Disease	26192919	0.0702991	0.0539996	1.65557	1.27171	0.606566	-2.78e-07	1.32e-07	0.982385
ldscAll	MDT non-Neuronal	Brain	Ulcerative Colitis	26192919	-0.0603683	0.0747409	-1.4217	1.76018	0.159475	-3.17e-07	9.48e-08	0.999583
ldscAll	MDT non-Neuronal	Brain	Coronary Artery Disease	26343387	0.0910487	0.0462405	2.14423	1.08898	0.297925	-2.3e-08	1.91e-08	0.885402
ldscAll	NAC non-Neuronal	Brain	Schizophrenia	25056061	0.023786	0.0179486	1.05965	0.799603	0.940502	-9.41e-08	5.53e-08	0.955533
ldscAll	NAC non-Neuronal	Brain	Alzheimer's Disease	24162737	0.200366	0.145608	8.92619	6.48675	0.204124	2e-08	6.28e-08	0.375014
ldscAll	NAC non-Neuronal	Brain	ADHD	-	0.0577917	0.0385494	2.57459	1.71736	0.355907	4.15e-08	5.93e-08	0.241812
ldscAll	NAC non-Neuronal	Brain	Autism	-	0.0604314	0.0438821	2.69219	1.95492	0.391468	1.95e-08	6.16e-08	0.37597
ldscAll	NAC non-Neuronal	Brain	Education Years	28197077	0.0698367	0.0185786	3.11119	0.827667	0.0103317	1.69e-08	1.55e-08	0.137707
ldscAll	NAC non-Neuronal	Brain	Subjective Well Being	27089181	0.0579475	0.0482305	2.58153	2.14864	0.458345	2.08e-09	8.7e-09	0.405586
ldscAll	NAC non-Neuronal	Brain	Neuroticism	27089181	0.0675668	0.0313964	3.01007	1.39869	0.157252	2.34e-08	2.01e-08	0.121889
ldscAll	NAC non-Neuronal	Brain	Depressive Symptoms	27089181	0.057505	0.0521358	2.56182	2.32262	0.502839	-6.56e-09	1.74e-08	0.647009
ldscAll	NAC non-Neuronal	Brain	Chronotype	27494321	0.0758566	0.03353	3.37937	1.49374	0.110386	1.62e-08	2.42e-08	0.251406
ldscAll	NAC non-Neuronal	Brain	Sleep Duration	27494321	0.00687881	0.0491401	0.306448	2.18917	0.75152	-1.7e-09	2.07e-08	0.532713
ldscAll	NAC non-Neuronal	Brain	BMI	25673413	0.0546902	0.0337307	2.43642	1.50269	0.334714	6.54e-09	3.78e-08	0.431231
ldscAll	NAC non-Neuronal	Brain	Height	25282103	0.0563602	0.0184295	2.51082	0.821023	0.0642864	-5.63e-08	4.63e-08	0.887749
ldscAll	NAC non-Neuronal	Brain	Crohn's Disease	26192919	0.0273668	0.0439593	1.21918	1.95837	0.910245	-3.71e-07	1.97e-07	0.970343
ldscAll	NAC non-Neuronal	Brain	Ulcerative Colitis	26192919	0.00888784	0.0538762	0.395949	2.40016	0.800628	-2.14e-07	1.2e-07	0.962826
ldscAll	NAC non-Neuronal	Brain	Coronary Artery Disease	26343387	0.0203114	0.0355269	0.904861	1.5827	0.951946	-3.24e-08	2.44e-08	0.907541
ldscAll	PUT non-Neuronal	Brain	Schizophrenia	25056061	0.089759	0.0251162	2.30223	0.644207	0.0413265	-6.07e-09	4.89e-08	0.549356
ldscAll	PUT non-Neuronal	Brain	Alzheimer's Disease	24162737	0.263852	0.144139	6.76756	3.69703	0.114373	-2.35e-09	4.08e-08	0.522929
ldscAll	PUT non-Neuronal	Brain	ADHD	-	0.124701	0.0503927	3.19846	1.29253	0.090631	7.32e-08	4.66e-08	0.0580787
ldscAll	PUT non-Neuronal	Brain	Autism	-	0.150433	0.0578938	3.85847	1.48492	0.0561338	6.94e-08	5.08e-08	0.0857595
ldscAll	PUT non-Neuronal	Brain	Education Years	28197077	0.134073	0.0222675	3.43885	0.57114	2.36e-05	2.69e-08	1.09e-08	0.00671249
ldscAll	PUT non-Neuronal	Brain	Subjective Well Being	27089181	0.142012	0.0587106	3.64247	1.50587	0.0720014	7.29e-09	6.05e-09	0.114123
ldscAll	PUT non-Neuronal	Brain	Neuroticism	27089181	0.0942265	0.039762	2.41682	1.01986	0.167163	1.43e-08	1.56e-08	0.179589
ldscAll	PUT non-Neuronal	Brain	Depressive Symptoms	27089181	0.137804	0.0655566	3.53455	1.68146	0.138103	4.36e-09	1.31e-08	0.369294
ldscAll	PUT non-Neuronal	Brain	Chronotype	27494321	0.0820378	0.0424889	2.10419	1.0898	0.3101	-5.66e-09	1.91e-08	0.616768
ldscAll	PUT non-Neuronal	Brain	Sleep Duration	27494321	0.015824	0.0602396	0.40587	1.54509	0.699555	-3.99e-09	1.6e-08	0.59846
ldscAll	PUT non-Neuronal	Brain	BMI	25673413	0.117168	0.020972	3.00526	0.537911	0.000449321	2.03e-08	1.55e-08	0.0948712
ldscAll	PUT non-Neuronal	Brain	Height	25282103	0.131213	0.0245808	3.36549	0.630475	0.000194553	-5.07e-09	3.97e-08	0.550891
ldscAll	PUT non-Neuronal	Brain	Crohn's Disease	26192919	0.0502875	0.0554742	1.28983	1.42286	0.837789	-3.16e-07	1.46e-07	0.98476
ldscAll	PUT non-Neuronal	Brain	Ulcerative Colitis	26192919	-0.0771687	0.0707268	-1.9793	1.81408	0.0947359	-3.41e-07	1e-07	0.999672
ldscAll	PUT non-Neuronal	Brain	Coronary Artery Disease	26343387	0.0706136	0.0473229	1.81117	1.21379	0.504714	-2.79e-08	1.99e-08	0.919507
ldscDiff	Neuronal	Brain	Schizophrenia	25056061	0.329689	0.0360869	1.9967	0.218554	8.46e-06	5.2e-08	1.8e-08	0.00188593
ldscDiff	non-Neuronal	Brain	Schizophrenia	25056061	0.0779679	0.0224059	2.05754	0.591282	0.0723563	-7.84e-09	4.37e-08	0.571211
ldscDiff	Neocortex	Brain	Schizophrenia	25056061	0.135193	0.0250412	2.68474	0.497284	0.000772992	8.25e-08	3.67e-08	0.0122753
ldscDiff	Primary Visual Cortex	Brain	Schizophrenia	25056061	0.0519075	0.0156976	2.8274	0.855047	0.0338206	7.65e-08	5.9e-08	0.0972632
ldscDiff	Hippocampus	Brain	Schizophrenia	25056061	0.043812	0.0129256	4.57463	1.34963	0.00833832	1.95e-07	9.09e-08	0.0161494
ldscDiff	Mediodorsal Thalamus	Brain	Schizophrenia	25056061	0.104748	0.0240325	2.93189	0.672665	0.00462633	9.18e-08	4.72e-08	0.0258727
ldscDiff	Striatum	Brain	Schizophrenia	25056061	0.201364	0.0287937	2.65353	0.379437	1.9e-05	9.23e-08	2.74e-08	0.000386466
ldscDiff	Neuronal	Brain	Alzheimer's Disease	24162737	0.0834639	0.176585	0.505484	1.06946	0.642552	-7.63e-09	1.4e-08	0.706783
ldscDiff	non-Neuronal	Brain	Alzheimer's Disease	24162737	0.237675	0.136089	6.27215	3.59133	0.150253	1.38e-08	3.82e-08	0.358881
ldscDiff	Neocortex	Brain	Alzheimer's Disease	24162737	0.0657211	0.136216	1.30513	2.70506	0.910078	-6.45e-09	3.12e-08	0.58194
ldscDiff	Primary Visual Cortex	Brain	Alzheimer's Disease	24162737	-0.0281456	0.0629802	-1.53309	3.43053	0.465919	-4.64e-08	3.72e-08	0.893986
ldscDiff	Hippocampus	Brain	Alzheimer's Disease	24162737	-0.0119977	0.0837515	-1.25274	8.74491	0.796541	-3.56e-08	9.19e-08	0.650574
ldscDiff	Mediodorsal Thalamus	Brain	Alzheimer's Disease	24162737	0.365011	0.142942	10.2166	4.00092	0.0141958	9.02e-08	4.12e-08	0.0143059
ldscDiff	Striatum	Brain	Alzheimer's Disease	24162737	-0.0310892	0.140966	-0.409687	1.85761	0.459707	-2.12e-08	2.15e-08	0.838956
ldscDiff	Neuronal	Brain	ADHD	-	0.271841	0.0753212	1.64636	0.456169	0.150764	1.51e-08	1.85e-08	0.208012
ldscDiff	non-Neuronal	Brain	ADHD	-	0.102999	0.0421115	2.7181	1.11131	0.127863	4.18e-08	3.96e-08	0.145277
ldscDiff	Neocortex	Brain	ADHD	-	0.0931187	0.0498608	1.84921	0.990169	0.391539	2.02e-08	3.64e-08	0.289472
ldscDiff	Primary Visual Cortex	Brain	ADHD	-	0.0532353	0.0307617	2.89972	1.67558	0.254715	5.39e-08	5.76e-08	0.174686
ldscDiff	Hippocampus	Brain	ADHD	-	0.021552	0.0255793	2.25035	2.67087	0.639321	2.46e-08	9.18e-08	0.394464
ldscDiff	Mediodorsal Thalamus	Brain	ADHD	-	0.0654142	0.0413014	1.83093	1.15602	0.471681	1.42e-08	4.11e-08	0.364728
ldscDiff	Striatum	Brain	ADHD	-	0.235051	0.0593785	3.09745	0.782477	0.00596247	6.59e-08	2.74e-08	0.00810818
ldscDiff	Neuronal	Brain	Autism	-	0.266405	0.0824131	1.61343	0.49912	0.209336	8.38e-09	1.77e-08	0.317765
ldscDiff	non-Neuronal	Brain	Autism	-	0.107538	0.0547158	2.83788	1.44393	0.214007	3.14e-08	4.72e-08	0.253076
ldscDiff	Neocortex	Brain	Autism	-	0.175405	0.0565961	3.48331	1.12392	0.0260725	6.4e-08	3.55e-08	0.0357537
ldscDiff	Primary Visual Cortex	Brain	Autism	-	0.00543396	0.0337291	0.295987	1.83722	0.701663	-4.05e-08	5.56e-08	0.766467
ldscDiff	Hippocampus	Brain	Autism	-	0.00964092	0.0252886	1.00666	2.64051	0.997992	-2.11e-08	7.85e-08	0.606085
ldscDiff	Mediodorsal Thalamus	Brain	Autism	-	0.152744	0.0449066	4.27528	1.25693	0.0101966	8.29e-08	3.89e-08	0.0165255
ldscDiff	Striatum	Brain	Autism	-	0.126934	0.0688157	1.67271	0.906838	0.451493	8.45e-09	2.84e-08	0.383074
ldscDiff	Neuronal	Brain	Education Years	28197077	0.318945	0.0367579	1.93163	0.222617	4.96e-05	1.25e-08	4.89e-09	0.00532272
ldscDiff	non-Neuronal	Brain	Education Years	28197077	0.11229	0.0209556	2.96329	0.553009	0.00041235	1.85e-08	1.08e-08	0.0434318
ldscDiff	Neocortex	Brain	Education Years	28197077	0.164911	0.0240214	3.27492	0.477032	3.37e-06	3.51e-08	9.55e-09	0.000120817
ldscDiff	Primary Visual Cortex	Brain	Education Years	28197077	0.0729084	0.0162122	3.97131	0.883076	0.000924831	4.34e-08	1.65e-08	0.00421213
ldscDiff	Hippocampus	Brain	Education Years	28197077	0.0290929	0.0114966	3.03773	1.20042	0.0900473	2.45e-08	2.24e-08	0.13715
ldscDiff	Mediodorsal Thalamus	Brain	Education Years	28197077	0.0832056	0.0194403	2.32891	0.544131	0.0166795	1.41e-08	1.07e-08	0.0944688
ldscDiff	Striatum	Brain	Education Years	28197077	0.222503	0.0275721	2.9321	0.363339	3.98e-07	3.05e-08	7.13e-09	9.63e-06
ldscDiff	Neuronal	Brain	Subjective Well Being	27089181	0.428039	0.0962816	2.59234	0.583112	0.00288358	5.39e-09	2.48e-09	0.0149956
ldscDiff	non-Neuronal	Brain	Subjective Well Being	27089181	0.126314	0.0573918	3.33337	1.51454	0.122232	5e-09	6.48e-09	0.220399
ldscDiff	Neocortex	Brain	Subjective Well Being	27089181	0.0816466	0.0598501	1.62139	1.18854	0.59882	2.96e-11	4.84e-09	0.497565
ldscDiff	Primary Visual Cortex	Brain	Subjective Well Being	27089181	0.0523774	0.0432036	2.85299	2.3533	0.428982	4.63e-09	9.3e-09	0.309267
ldscDiff	Hippocampus	Brain	Subjective Well Being	27089181	0.0521866	0.0303431	5.44907	3.16827	0.151192	1.44e-08	1.21e-08	0.118484
ldscDiff	Mediodorsal Thalamus	Brain	Subjective Well Being	27089181	0.172787	0.0504252	4.83628	1.41139	0.00476949	1.3e-08	5.46e-09	0.0087265
ldscDiff	Striatum	Brain	Subjective Well Being	27089181	0.253821	0.0723003	3.3448	0.952756	0.00758922	7.79e-09	3.66e-09	0.0165411
ldscDiff	Neuronal	Brain	Neuroticism	27089181	0.257019	0.063345	1.55659	0.383637	0.122053	2.93e-09	6.26e-09	0.319962
ldscDiff	non-Neuronal	Brain	Neuroticism	27089181	0.135092	0.0350672	3.56503	0.92541	0.0119933	3.07e-08	1.46e-08	0.0174199
ldscDiff	Neocortex	Brain	Neuroticism	27089181	0.13957	0.0390159	2.77168	0.774803	0.018373	1.89e-08	1.11e-08	0.044339
ldscDiff	Primary Visual Cortex	Brain	Neuroticism	27089181	0.0292476	0.0316992	1.59311	1.72665	0.728568	2.11e-09	2.35e-08	0.464305
ldscDiff	Hippocampus	Brain	Neuroticism	27089181	0.0546475	0.023436	5.70603	2.44707	0.0511922	5.58e-08	3.26e-08	0.0437225
ldscDiff	Mediodorsal Thalamus	Brain	Neuroticism	27089181	0.147426	0.0299418	4.12643	0.838068	0.000438088	3.78e-08	1.22e-08	0.000947682
ldscDiff	Striatum	Brain	Neuroticism	27089181	0.194154	0.0520604	2.55852	0.68604	0.0126278	1.77e-08	9.28e-09	0.0283072
ldscDiff	Neuronal	Brain	Depressive Symptoms	27089181	0.24371	0.0906606	1.47599	0.549069	0.389981	-1.04e-09	4.32e-09	0.595013
ldscDiff	non-Neuronal	Brain	Depressive Symptoms	27089181	0.185776	0.0531074	4.90255	1.40148	0.00624983	1.84e-08	1.04e-08	0.0382554
ldscDiff	Neocortex	Brain	Depressive Symptoms	27089181	0.105346	0.0660891	2.09204	1.31244	0.408042	1.68e-09	9.44e-09	0.429428
ldscDiff	Primary Visual Cortex	Brain	Depressive Symptoms	27089181	0.0733019	0.0476309	3.99275	2.59445	0.249483	1.13e-08	1.77e-08	0.261114
ldscDiff	Hippocampus	Brain	Depressive Symptoms	27089181	0.0816428	0.0313959	8.52474	3.27821	0.0208702	4.34e-08	2.22e-08	0.0253457
ldscDiff	Mediodorsal Thalamus	Brain	Depressive Symptoms	27089181	0.143298	0.05036	4.0109	1.40957	0.035676	1.56e-08	9.99e-09	0.0590709
ldscDiff	Striatum	Brain	Depressive Symptoms	27089181	0.253134	0.0783112	3.33574	1.03197	0.0241888	1.2e-08	7.3e-09	0.0503058
ldscDiff	Neuronal	Brain	Chronotype	27494321	0.122453	0.0554959	0.741615	0.336101	0.444317	-1.13e-08	6.14e-09	0.966724
ldscDiff	non-Neuronal	Brain	Chronotype	27494321	0.118711	0.0360011	3.13273	0.950055	0.0259401	2.04e-08	1.64e-08	0.106248
ldscDiff	Neocortex	Brain	Chronotype	27494321	0.0586326	0.0430714	1.16437	0.855341	0.847369	-4.57e-09	1.36e-08	0.631996
ldscDiff	Primary Visual Cortex	Brain	Chronotype	27494321	0.00640188	0.0237403	0.34871	1.29313	0.616102	-2.06e-08	2e-08	0.848521
ldscDiff	Hippocampus	Brain	Chronotype	27494321	0.00139164	0.0206351	0.145308	2.15461	0.691682	-2.26e-08	3.34e-08	0.75081
ldscDiff	Mediodorsal Thalamus	Brain	Chronotype	27494321	0.0228847	0.032505	0.640538	0.90981	0.692244	-1.44e-08	1.47e-08	0.835527
ldscDiff	Striatum	Brain	Chronotype	27494321	0.123945	0.0480749	1.63332	0.633521	0.316702	4.2e-09	1.05e-08	0.34504
ldscDiff	Neuronal	Brain	Sleep Duration	27494321	0.305869	0.0797065	1.85244	0.482728	0.074815	7.73e-09	5.08e-09	0.0640467
ldscDiff	non-Neuronal	Brain	Sleep Duration	27494321	0.0541249	0.0524907	1.42833	1.38521	0.757882	3.2e-09	1.39e-08	0.408754
ldscDiff	Neocortex	Brain	Sleep Duration	27494321	0.071835	0.0612716	1.42655	1.21677	0.726734	3.59e-09	1.17e-08	0.379036
ldscDiff	Primary Visual Cortex	Brain	Sleep Duration	27494321	-0.031694	0.0385643	-1.72637	2.10059	0.197161	-2.6e-08	1.93e-08	0.910493
ldscDiff	Hippocampus	Brain	Sleep Duration	27494321	0.0474273	0.035238	4.95213	3.67937	0.279837	3.44e-08	3.29e-08	0.147898
ldscDiff	Mediodorsal Thalamus	Brain	Sleep Duration	27494321	0.079123	0.0528997	2.21464	1.48065	0.414684	8.88e-09	1.39e-08	0.26134
ldscDiff	Striatum	Brain	Sleep Duration	27494321	0.255104	0.0732234	3.3617	0.964921	0.0122844	2.08e-08	8.86e-09	0.00937871
ldscDiff	Neuronal	Brain	BMI	25673413	0.242537	0.0658687	1.46888	0.398922	0.231152	2.54e-09	1.1e-08	0.4084
ldscDiff	non-Neuronal	Brain	BMI	25673413	0.102114	0.0243658	2.69474	0.643003	0.00720208	1.37e-08	1.63e-08	0.199308
ldscDiff	Neocortex	Brain	BMI	25673413	0.0691382	0.0291819	1.37299	0.579513	0.513179	-3.97e-09	1.37e-08	0.613916
ldscDiff	Primary Visual Cortex	Brain	BMI	25673413	0.0161649	0.0153522	0.880499	0.836234	0.885119	-1.73e-08	1.87e-08	0.822768
ldscDiff	Hippocampus	Brain	BMI	25673413	0.0188763	0.0138513	1.97097	1.44628	0.493615	5.08e-09	3.17e-08	0.436354
ldscDiff	Mediodorsal Thalamus	Brain	BMI	25673413	0.134721	0.0348253	3.77083	0.974754	0.00853017	5.02e-08	2.46e-08	0.0204707
ldscDiff	Striatum	Brain	BMI	25673413	0.178043	0.04606	2.34621	0.606968	0.024235	2.27e-08	1.46e-08	0.0599485
ldscDiff	Neuronal	Brain	Height	25282103	0.198199	0.0351792	1.20036	0.213057	0.345906	-1.51e-08	1.52e-08	0.83964
ldscDiff	non-Neuronal	Brain	Height	25282103	0.115182	0.0219322	3.0396	0.578782	0.000446519	6.51e-09	3.69e-08	0.430021
ldscDiff	Neocortex	Brain	Height	25282103	0.088925	0.0242342	1.76593	0.48126	0.11227	-3.28e-09	2.84e-08	0.546097
ldscDiff	Primary Visual Cortex	Brain	Height	25282103	0.0065053	0.0143641	0.354343	0.782412	0.409736	-1.01e-07	4.49e-08	0.987589
ldscDiff	Hippocampus	Brain	Height	25282103	0.0150542	0.0126616	1.57189	1.32206	0.664503	-2.36e-08	7.69e-08	0.620729
ldscDiff	Mediodorsal Thalamus	Brain	Height	25282103	0.0445005	0.0197603	1.24556	0.553086	0.65722	-4.36e-08	3.41e-08	0.899484
ldscDiff	Striatum	Brain	Height	25282103	0.0310857	0.0272598	0.40964	0.359223	0.102407	-6.49e-08	2.32e-08	0.997441
ldscDiff	Neuronal	Brain	Crohn's Disease	26192919	0.204589	0.0757446	1.23905	0.458733	0.604664	-7.93e-09	5.1e-08	0.561793
ldscDiff	non-Neuronal	Brain	Crohn's Disease	26192919	0.0691495	0.0492156	1.82483	1.29878	0.525763	-2.09e-07	1.37e-07	0.936254
ldscDiff	Neocortex	Brain	Crohn's Disease	26192919	0.0364071	0.0500977	0.722995	0.994873	0.778426	-1.22e-07	9.67e-08	0.896621
ldscDiff	Primary Visual Cortex	Brain	Crohn's Disease	26192919	0.0706359	0.029423	3.84753	1.60267	0.0830589	1.46e-07	1.59e-07	0.179702
ldscDiff	Hippocampus	Brain	Crohn's Disease	26192919	-0.00210641	0.0229554	-0.219941	2.39689	0.607998	-2.39e-07	2.22e-07	0.858616
ldscDiff	Mediodorsal Thalamus	Brain	Crohn's Disease	26192919	0.0152695	0.0488847	0.42739	1.36828	0.674223	-1.5e-07	1.33e-07	0.86936
ldscDiff	Striatum	Brain	Crohn's Disease	26192919	0.145655	0.056569	1.91941	0.745453	0.222879	4.58e-08	7.48e-08	0.270246
ldscDiff	Neuronal	Brain	Ulcerative Colitis	26192919	0.117939	0.0863254	0.714278	0.522814	0.585806	-3.25e-08	2.97e-08	0.862898
ldscDiff	non-Neuronal	Brain	Ulcerative Colitis	26192919	0.0333766	0.0598158	0.880794	1.57851	0.939745	-1.51e-07	7.91e-08	0.972002
ldscDiff	Neocortex	Brain	Ulcerative Colitis	26192919	-0.0322149	0.066077	-0.639744	1.3122	0.205298	-1.24e-07	6.53e-08	0.971338
ldscDiff	Primary Visual Cortex	Brain	Ulcerative Colitis	26192919	-0.00342321	0.0365009	-0.186462	1.9882	0.549583	-1.2e-07	9.34e-08	0.900753
ldscDiff	Hippocampus	Brain	Ulcerative Colitis	26192919	0.0178971	0.0298929	1.86873	3.12127	0.78016	-1.72e-08	1.46e-07	0.546841
ldscDiff	Mediodorsal Thalamus	Brain	Ulcerative Colitis	26192919	-0.0294104	0.0550601	-0.823193	1.54112	0.238423	-1.37e-07	7.55e-08	0.965193
ldscDiff	Striatum	Brain	Ulcerative Colitis	26192919	0.0888215	0.0696642	1.17047	0.918018	0.852552	-1.4e-08	4.58e-08	0.620187
ldscDiff	Neuronal	Brain	Coronary Artery Disease	26343387	0.229931	0.0819987	1.39254	0.49661	0.42614	-3.16e-09	8.1e-09	0.651727
ldscDiff	non-Neuronal	Brain	Coronary Artery Disease	26343387	0.112895	0.0423019	2.97924	1.11633	0.0789187	-2.66e-09	1.76e-08	0.560205
ldscDiff	Neocortex	Brain	Coronary Artery Disease	26343387	-0.00441614	0.0592458	-0.0876986	1.17654	0.354588	-3.35e-08	1.7e-08	0.975703
ldscDiff	Primary Visual Cortex	Brain	Coronary Artery Disease	26343387	0.024984	0.0281837	1.36088	1.53516	0.813351	-1.09e-08	2.17e-08	0.693359
ldscDiff	Hippocampus	Brain	Coronary Artery Disease	26343387	-0.0301968	0.0210932	-3.153	2.20245	0.0633173	-7.38e-08	3.11e-08	0.991193
ldscDiff	Mediodorsal Thalamus	Brain	Coronary Artery Disease	26343387	0.0240018	0.04762	0.671807	1.33288	0.802745	-2.16e-08	1.86e-08	0.876451
ldscDiff	Striatum	Brain	Coronary Artery Disease	26343387	0.186495	0.0903332	2.45758	1.19039	0.216337	1.51e-08	1.75e-08	0.192866
iDnase	Brain Angular Gyrus	Brain	Schizophrenia	25056061	0.29589	0.0343648	3.29935	0.383189	1.24e-08	1.26e-07	4.07e-08	0.000981401
iDnase	Brain Anterior Caudate	Brain	Schizophrenia	25056061	0.249358	0.0334824	2.70673	0.363445	6.42e-06	5.93e-08	3.76e-08	0.0572006
iDnase	Brain Cingulate Gyrus	Brain	Schizophrenia	25056061	0.244827	0.0317367	2.67146	0.346299	3.02e-06	5.34e-08	3.56e-08	0.0665043
iDnase	Brain Dorsolateral Prefrontal Cortex	Brain	Schizophrenia	25056061	0.233809	0.0318493	2.69517	0.367134	8.67e-06	5.64e-08	3.87e-08	0.0723589
iDnase	Brain Germinal Matrix	Brain	Schizophrenia	25056061	0.29032	0.0332831	4.47691	0.513246	2.77e-10	2.09e-07	4.62e-08	3.05e-06
iDnase	Brain Hippocampus Middle	Brain	Schizophrenia	25056061	0.237328	0.0315252	2.31402	0.30738	3.19e-05	1.92e-08	3.43e-08	0.288115
iDnase	Brain Inferior Temporal Lobe	Brain	Schizophrenia	25056061	0.270251	0.0320388	3.00518	0.35627	8.88e-08	9.41e-08	3.72e-08	0.00573828
iDnase	Brain Substantia Nigra	Brain	Schizophrenia	25056061	0.163765	0.0320044	1.80119	0.352006	0.024298	-5.2e-08	3.76e-08	0.916712
iDnase	Fetal Brain Female	Brain	Schizophrenia	25056061	0.344484	0.0361636	3.55668	0.373377	1.32e-10	1.57e-07	3.52e-08	4.35e-06
iDnase	Fetal Brain Male	Brain	Schizophrenia	25056061	0.270562	0.0328275	3.3008	0.400488	4.92e-08	1.17e-07	3.8e-08	0.00101834
iDnase	Cortex derived primary cultured neurospheres	Brain	Schizophrenia	25056061	0.289054	0.0354525	3.67582	0.45084	9.8e-09	1.47e-07	4.19e-08	0.000231775
iDnase	Ganglion Eminence derived primary cultured neurospheres	Brain	Schizophrenia	25056061	0.283162	0.0356396	3.6175	0.455309	2.87e-08	1.4e-07	4.27e-08	0.000529224
iDnase	NH-A Astrocytes Primary Cells	Brain	Schizophrenia	25056061	0.157533	0.0334514	1.41554	0.300582	0.166006	-3.21e-08	2.98e-08	0.859359
iDnase	H1 Derived Neuronal Progenitor Cultured Cells	Stem-cells	Schizophrenia	25056061	0.155221	0.0293922	2.48979	0.471458	0.00218272	3.22e-08	4.31e-08	0.227534
iDnase	H9 Derived Neuronal Progenitor Cultured Cells	Stem-cells	Schizophrenia	25056061	0.177584	0.0289103	2.37235	0.386214	0.000446685	1.95e-08	3.78e-08	0.302974
iDnase	H9 Derived Neuron Cultured Cells	Stem-cells	Schizophrenia	25056061	0.276232	0.0323554	3.45498	0.404686	3.68e-09	1.31e-07	3.8e-08	0.000278537
iDnase	Adipose Nuclei	Adipose	Schizophrenia	25056061	0.10687	0.0322271	1.05446	0.317976	0.863769	-1.23e-07	3.48e-08	0.999799
iDnase	Fetal Adrenal Gland	Adrenal	Schizophrenia	25056061	0.107167	0.029698	1.18893	0.329474	0.566058	-1.12e-07	3.28e-08	0.999682
iDnase	Osteoblast Primary Cells	Bone	Schizophrenia	25056061	0.158825	0.0301809	1.44744	0.275052	0.104205	-3.19e-08	2.66e-08	0.884392
iDnase	Colonic Mucosa	Digestive	Schizophrenia	25056061	0.0841477	0.0297985	1.15007	0.407264	0.711958	-1.21e-07	4.25e-08	0.997846
iDnase	Duodenum Mucosa	Digestive	Schizophrenia	25056061	0.0935949	0.0247324	1.24229	0.328274	0.460492	-9.8e-08	3.61e-08	0.996652
iDnase	Esophagus	Digestive	Schizophrenia	25056061	0.0666109	0.0261479	0.956753	0.37557	0.908245	-1.26e-07	3.64e-08	0.999732
iDnase	Fetal Intestine Large	Digestive	Schizophrenia	25056061	0.0855606	0.0219908	1.20638	0.310063	0.50624	-1.11e-07	2.97e-08	0.999903
iDnase	Fetal Intestine Small	Digestive	Schizophrenia	25056061	0.0815018	0.0228491	0.983542	0.275737	0.952371	-1.28e-07	2.86e-08	0.999996
iDnase	Fetal Stomach	Digestive	Schizophrenia	25056061	0.0732989	0.0268164	0.80464	0.294378	0.506439	-1.68e-07	3.12e-08	1
iDnase	Gastric	Digestive	Schizophrenia	25056061	0.0677162	0.0276106	0.996406	0.406275	0.992934	-1.29e-07	4.15e-08	0.999015
iDnase	Rectal Mucosa 1	Digestive	Schizophrenia	25056061	0.071843	0.0238516	0.981396	0.325819	0.954446	-1.4e-07	3.48e-08	0.99997
iDnase	Rectal Mucosa 2	Digestive	Schizophrenia	25056061	0.0610129	0.0240742	0.841171	0.331905	0.632124	-1.48e-07	3.51e-08	0.999988
iDnase	Sigmoid Colon	Digestive	Schizophrenia	25056061	0.085897	0.0245393	1.21632	0.347482	0.533101	-1.05e-07	3.63e-08	0.998007
iDnase	Small Intestine	Digestive	Schizophrenia	25056061	0.0751466	0.0265945	1.02613	0.363149	0.942584	-1.27e-07	4e-08	0.99926
iDnase	Stomach Mucosa	Digestive	Schizophrenia	25056061	0.0670168	0.0246592	0.85974	0.316346	0.657243	-1.44e-07	3.35e-08	0.999992
iDnase	Breast Myoepithelial Primary Cells	Epithelial	Schizophrenia	25056061	0.117186	0.0328576	1.06923	0.299801	0.817029	-7.81e-08	2.9e-08	0.996468
iDnase	Breast variant Human Mammary Epithelial Cells (vHMEC)	Epithelial	Schizophrenia	25056061	0.125462	0.0332245	1.10908	0.293702	0.709494	-5.34e-08	2.75e-08	0.973927
iDnase	Foreskin Fibroblast Primary Cells skin 1	Epithelial	Schizophrenia	25056061	0.146709	0.0306214	1.31417	0.274297	0.250717	-5.35e-08	2.73e-08	0.975153
iDnase	Foreskin Fibroblast Primary Cells skin 2	Epithelial	Schizophrenia	25056061	0.150022	0.0300119	1.49065	0.298204	0.100079	-3.85e-08	2.91e-08	0.907053
iDnase	Foreskin Keratinocyte Primary Cells skin 1	Epithelial	Schizophrenia	25056061	0.103526	0.0296582	1.10989	0.317964	0.729175	-7.07e-08	2.96e-08	0.991537
iDnase	Foreskin Keratinocyte Primary Cells skin 2	Epithelial	Schizophrenia	25056061	0.143607	0.032429	1.29367	0.292134	0.312522	-3.75e-08	2.65e-08	0.921649
iDnase	Foreskin Melanocyte Primary Cells skin 1	Epithelial	Schizophrenia	25056061	0.100073	0.0303456	1.22076	0.370178	0.550007	-7.56e-08	3.47e-08	0.985349
iDnase	Foreskin Melanocyte Primary Cells skin 2	Epithelial	Schizophrenia	25056061	0.127814	0.034246	1.06198	0.284543	0.827127	-7.74e-08	2.77e-08	0.997367
iDnase	HeLa-S3 Cervical Carcinoma Cell Line	Epithelial	Schizophrenia	25056061	0.117017	0.0298868	1.22916	0.313934	0.464054	-5.12e-08	3.05e-08	0.953059
iDnase	HMEC Mammary Epithelial Primary Cells	Epithelial	Schizophrenia	25056061	0.0969339	0.028655	1.02738	0.303708	0.928068	-6.47e-08	2.78e-08	0.990086
iDnase	NHDF-Ad Adult Dermal Fibroblast Primary Cells	Epithelial	Schizophrenia	25056061	0.11641	0.031538	1.31617	0.356578	0.375405	-4.73e-08	3.31e-08	0.923349
iDnase	NHEK-Epidermal Keratinocyte Primary Cells	Epithelial	Schizophrenia	25056061	0.123646	0.0318544	1.11668	0.287686	0.68392	-5.25e-08	2.7e-08	0.973858
iDnase	Aorta	Heart	Schizophrenia	25056061	0.079784	0.0284899	1.12614	0.402131	0.753593	-1.03e-07	3.93e-08	0.995722
iDnase	Fetal Heart	Heart	Schizophrenia	25056061	0.0991515	0.0300813	0.931869	0.282717	0.809506	-1.34e-07	3.15e-08	0.999989
iDnase	Left Ventricle	Heart	Schizophrenia	25056061	0.127828	0.0250834	1.62139	0.318161	0.0517809	-6.6e-08	3.38e-08	0.974515
iDnase	Right Atrium	Heart	Schizophrenia	25056061	0.104986	0.0280458	1.47657	0.394447	0.226091	-8.89e-08	3.99e-08	0.987177
iDnase	Right Ventricle	Heart	Schizophrenia	25056061	0.0886257	0.0301785	0.947591	0.32267	0.870901	-1.29e-07	3.25e-08	0.999965
iDnase	Dnd41 TCell Leukemia Cell Line	Immune	Schizophrenia	25056061	0.153799	0.0248121	2.08232	0.335937	0.00166264	2.63e-08	3.03e-08	0.192647
iDnase	Fetal Thymus	Immune	Schizophrenia	25056061	0.127596	0.0252033	1.86767	0.368909	0.0197127	-6.64e-09	3.43e-08	0.57667
iDnase	GM12878 Lymphoblastoid Cells	Immune	Schizophrenia	25056061	0.117972	0.0253096	1.8182	0.390072	0.0367679	3.1e-09	3.92e-08	0.468436
iDnase	K562 Leukemia Cells	Immune	Schizophrenia	25056061	0.0876172	0.0280519	1.05561	0.337969	0.869138	-8.29e-08	3.57e-08	0.989843
iDnase	Monocytes-CD14+ RO01746 Primary Cells	Immune	Schizophrenia	25056061	0.128287	0.0231159	1.52049	0.273977	0.0589633	-2.73e-08	2.84e-08	0.831431
iDnase	Primary B cells from cord blood	Immune	Schizophrenia	25056061	0.124248	0.0241451	2.14392	0.416627	0.00646101	3.51e-08	3.93e-08	0.186095
iDnase	Primary B cells from peripheral blood	Immune	Schizophrenia	25056061	0.133689	0.0244204	2.13108	0.389274	0.00400399	4.2e-08	3.83e-08	0.136258
iDnase	Primary hematopoietic stem cells	Immune	Schizophrenia	25056061	0.0940126	0.0225537	1.72482	0.413785	0.0837629	-2.81e-08	4.02e-08	0.757657
iDnase	Primary hematopoietic stem cells G-CSF-mobilized Female	Immune	Schizophrenia	25056061	0.112959	0.0258045	1.48795	0.339908	0.152783	-4.97e-08	3.48e-08	0.923315
iDnase	Primary hematopoietic stem cells G-CSF-mobilized Male	Immune	Schizophrenia	25056061	0.136828	0.0245061	1.64775	0.295116	0.0309392	-2.54e-08	2.91e-08	0.808555
iDnase	Primary hematopoietic stem cells short term culture	Immune	Schizophrenia	25056061	0.104916	0.0236631	1.54459	0.348373	0.121187	-3.97e-08	3.52e-08	0.870814
iDnase	Primary monocytes from peripheral blood	Immune	Schizophrenia	25056061	0.0998993	0.0227752	1.50588	0.343315	0.141382	-3.36e-08	3.36e-08	0.841139
iDnase	Primary mononuclear cells from peripheral blood	Immune	Schizophrenia	25056061	0.0944068	0.0316621	1.18361	0.396958	0.643391	-7.87e-08	3.78e-08	0.981328
iDnase	Primary Natural Killer cells from peripheral blood	Immune	Schizophrenia	25056061	0.123581	0.023398	1.99725	0.378146	0.00927783	1.85e-08	3.57e-08	0.302207
iDnase	Primary neutrophils from peripheral blood	Immune	Schizophrenia	25056061	0.106892	0.0211608	1.60997	0.318719	0.0567957	-1.73e-08	2.94e-08	0.721206
iDnase	Primary T CD8+ memory cells from peripheral blood	Immune	Schizophrenia	25056061	0.132566	0.0258266	2.32018	0.452018	0.00364314	4.77e-08	4.25e-08	0.131286
iDnase	Primary T CD8+ naive cells from peripheral blood	Immune	Schizophrenia	25056061	0.141397	0.0252989	2.50952	0.449006	0.0008833	6.46e-08	4.1e-08	0.0574372
iDnase	Primary T cells effector/memory enriched from peripheral blood	Immune	Schizophrenia	25056061	0.138639	0.0255598	2.6332	0.485462	0.000885288	7.69e-08	4.3e-08	0.0368216
iDnase	Primary T cells from cord blood	Immune	Schizophrenia	25056061	0.118271	0.0238733	2.39788	0.484017	0.00447011	3.98e-08	4.18e-08	0.170345
iDnase	Primary T cells from peripheral blood	Immune	Schizophrenia	25056061	0.140503	0.0256739	2.31146	0.422371	0.00212986	3.94e-08	4e-08	0.162154
iDnase	Primary T helper 17 cells PMA-I stimulated	Immune	Schizophrenia	25056061	0.145319	0.0263278	2.32831	0.421825	0.00183499	4.9e-08	3.86e-08	0.102102
iDnase	Primary T helper cells from peripheral blood	Immune	Schizophrenia	25056061	0.152865	0.025448	2.47685	0.412332	0.000420736	6.66e-08	3.88e-08	0.0430342
iDnase	Primary T helper cells PMA-I stimulated	Immune	Schizophrenia	25056061	0.172112	0.0250185	2.4997	0.363359	4.99e-05	7.76e-08	3.38e-08	0.010909
iDnase	Primary T helper memory cells from peripheral blood 1	Immune	Schizophrenia	25056061	0.140333	0.0246527	2.50994	0.44093	0.000711652	6.71e-08	3.99e-08	0.046091
iDnase	Primary T helper memory cells from peripheral blood 2	Immune	Schizophrenia	25056061	0.15143	0.026788	2.37884	0.420817	0.00117574	5.79e-08	4.11e-08	0.0794707
iDnase	Primary T helper naive cells from peripheral blood 1	Immune	Schizophrenia	25056061	0.141369	0.0271974	2.42376	0.466296	0.00244626	5.83e-08	4.27e-08	0.0857352
iDnase	Primary T helper naive cells from peripheral blood 2	Immune	Schizophrenia	25056061	0.15926	0.0256411	2.65382	0.42727	0.000140316	8.23e-08	3.91e-08	0.0177092
iDnase	Primary T regulatory cells from peripheral blood	Immune	Schizophrenia	25056061	0.144527	0.0253254	2.477	0.434044	0.000763029	7.16e-08	3.98e-08	0.0361039
iDnase	Spleen	Immune	Schizophrenia	25056061	0.0915209	0.0265571	1.29822	0.376711	0.42833	-9.42e-08	4.09e-08	0.989369
iDnase	Thymus	Immune	Schizophrenia	25056061	0.115723	0.0247669	2.04734	0.438171	0.0173358	3.78e-09	4.01e-08	0.462523
iDnase	Adipose Derived Mesenchymal Stem Cell Cultured Cells	Mesench	Schizophrenia	25056061	0.149321	0.0322988	1.13169	0.244789	0.590486	-6.87e-08	2.58e-08	0.996061
iDnase	Bone Marrow Derived Cultured Mesenchymal Stem Cells	Mesench	Schizophrenia	25056061	0.148475	0.0309973	1.32038	0.275658	0.245543	-4.69e-08	2.73e-08	0.957196
iDnase	Mesenchymal Stem Cell Derived Adipocyte Cultured Cells	Mesench	Schizophrenia	25056061	0.144606	0.0341701	1.13783	0.268868	0.60763	-7.21e-08	2.85e-08	0.994288
iDnase	Mesenchymal Stem Cell Derived Chondrocyte Cultured Cells	Mesench	Schizophrenia	25056061	0.15371	0.0321553	1.28042	0.267857	0.295048	-5.8e-08	2.72e-08	0.983713
iDnase	Fetal Muscle Leg	Muscle	Schizophrenia	25056061	0.0797223	0.0297619	0.95006	0.354676	0.887856	-1.5e-07	3.62e-08	0.999983
iDnase	Fetal Muscle Trunk	Muscle	Schizophrenia	25056061	0.08975	0.0289874	1.13754	0.367403	0.708186	-1.31e-07	3.56e-08	0.999875
iDnase	HSMM cell derived Skeletal Muscle Myotubes Cells	Muscle	Schizophrenia	25056061	0.164318	0.0359543	1.46899	0.321427	0.146225	-3.2e-08	3.15e-08	0.845238
iDnase	HSMM Skeletal Muscle Myoblasts Cells	Muscle	Schizophrenia	25056061	0.141341	0.0335659	1.40975	0.334789	0.221014	-3.8e-08	3.26e-08	0.878533
iDnase	Muscle Satellite Cultured Cells	Muscle	Schizophrenia	25056061	0.166149	0.0333756	1.43024	0.287303	0.133933	-3.37e-08	2.87e-08	0.880224
iDnase	Psoas Muscle	Muscle	Schizophrenia	25056061	0.0983144	0.0329369	1.11069	0.372098	0.765807	-1.07e-07	3.82e-08	0.99748
iDnase	Skeletal Muscle Female	Muscle	Schizophrenia	25056061	0.152112	0.0318557	1.50853	0.315921	0.108855	-6.53e-08	3.37e-08	0.973478
iDnase	Skeletal Muscle Male	Muscle	Schizophrenia	25056061	0.126122	0.0303382	1.50795	0.362733	0.161494	-8.6e-08	3.65e-08	0.990828
iDnase	A549 EtOH 0.02pct Lung Carcinoma Cell Line	Other	Schizophrenia	25056061	0.145986	0.0293215	1.26843	0.254767	0.290722	-4.36e-08	2.6e-08	0.953455
iDnase	Fetal Kidney	Other	Schizophrenia	25056061	0.0748067	0.0308178	0.927416	0.382064	0.849183	-1.32e-07	3.6e-08	0.999876
iDnase	Fetal Lung	Other	Schizophrenia	25056061	0.102623	0.0308389	1.14639	0.344496	0.670739	-1.25e-07	3.59e-08	0.999748
iDnase	HepG2 Hepatocellular Carcinoma Cell Line	Other	Schizophrenia	25056061	0.0403596	0.0311214	0.408889	0.315295	0.0625084	-1.68e-07	3.51e-08	0.999999
iDnase	HUVEC Umbilical Vein Endothelial Primary Cells	Other	Schizophrenia	25056061	0.118805	0.0341221	1.17856	0.338496	0.596747	-6.06e-08	3.56e-08	0.955505
iDnase	Liver	Other	Schizophrenia	25056061	0.103277	0.0277284	1.18555	0.318304	0.559398	-1.08e-07	3.58e-08	0.998759
iDnase	Lung	Other	Schizophrenia	25056061	0.0824136	0.0290169	1.15955	0.408267	0.695003	-1.18e-07	4.41e-08	0.996197
iDnase	NHLF Lung Fibroblast Primary Cells	Other	Schizophrenia	25056061	0.115155	0.0288257	1.28624	0.321971	0.374019	-5.89e-08	2.94e-08	0.977412
iDnase	Ovary	Other	Schizophrenia	25056061	0.0833881	0.0311292	1.1023	0.411494	0.803364	-1.17e-07	4.1e-08	0.997896
iDnase	Pancreas	Other	Schizophrenia	25056061	0.0630518	0.0287656	1.03034	0.470064	0.948462	-1.25e-07	4.5e-08	0.997306
iDnase	Pancreatic Islets	Other	Schizophrenia	25056061	0.113632	0.0273573	1.97507	0.475504	0.0401258	-2.87e-08	4.27e-08	0.749072
iDnase	Placenta	Other	Schizophrenia	25056061	0.0885525	0.0272651	1.12886	0.347572	0.710462	-1.12e-07	3.47e-08	0.999377
iDnase	Placenta Amnion	Other	Schizophrenia	25056061	0.0968494	0.0298874	0.981877	0.303004	0.952254	-8.95e-08	2.87e-08	0.999071
iDnase	Colon Smooth Muscle	Sm. Muscle	Schizophrenia	25056061	0.0808558	0.0280173	0.900653	0.312085	0.750166	-1.57e-07	3.31e-08	0.999999
iDnase	Duodenum Smooth Muscle	Sm. Muscle	Schizophrenia	25056061	0.0869002	0.028978	0.887634	0.295993	0.70432	-1.42e-07	3.46e-08	0.999981
iDnase	Rectal Smooth Muscle	Sm. Muscle	Schizophrenia	25056061	0.0909291	0.025658	1.22693	0.346212	0.512176	-1.21e-07	3.68e-08	0.999496
iDnase	Stomach Smooth Muscle	Sm. Muscle	Schizophrenia	25056061	0.0838202	0.0248827	1.05611	0.313513	0.857869	-1.44e-07	3.3e-08	0.999994
iDnase	ES-I3 Cells	Stem-cells	Schizophrenia	25056061	0.183347	0.0320221	2.0051	0.350196	0.00490608	6.86e-09	3.49e-08	0.421974
iDnase	ES-UCSF4 Cells	Stem-cells	Schizophrenia	25056061	0.223919	0.0300543	3.2904	0.441636	1.43e-06	1.3e-07	4.53e-08	0.0020046
iDnase	ES-WA7 Cells	Stem-cells	Schizophrenia	25056061	0.146144	0.0303634	2.26928	0.471474	0.00825358	3.04e-08	4.66e-08	0.256861
iDnase	H1 BMP4 Derived Mesendoderm Cultured Cells	Stem-cells	Schizophrenia	25056061	0.150156	0.0299739	2.21552	0.442258	0.00719493	1.36e-08	4.21e-08	0.373107
iDnase	H1 BMP4 Derived Trophoblast Cultured Cells	Stem-cells	Schizophrenia	25056061	0.101678	0.0304508	1.16063	0.347589	0.644246	-8.47e-08	3.36e-08	0.994114
iDnase	H1 Cells	Stem-cells	Schizophrenia	25056061	0.190947	0.0306984	2.94068	0.472771	9.88e-05	8.52e-08	4.62e-08	0.0324633
iDnase	H1 Derived Mesenchymal Stem Cells	Stem-cells	Schizophrenia	25056061	0.0884532	0.0298822	1.01775	0.343827	0.958807	-9.23e-08	3.26e-08	0.997703
iDnase	H9 Cells	Stem-cells	Schizophrenia	25056061	0.175521	0.0297134	3.04477	0.515439	0.000132099	9.09e-08	4.71e-08	0.0267379
iDnase	hESC Derived CD184+ Endoderm Cultured Cells	Stem-cells	Schizophrenia	25056061	0.175845	0.0349384	1.70554	0.33887	0.0393122	-3.06e-08	3.53e-08	0.807074
iDnase	hESC Derived CD56+ Ectoderm Cultured Cells	Stem-cells	Schizophrenia	25056061	0.168095	0.0294951	2.54109	0.445876	0.000819565	2.31e-08	4.11e-08	0.28709
iDnase	hESC Derived CD56+ Mesoderm Cultured Cells	Stem-cells	Schizophrenia	25056061	0.150298	0.0333216	1.44703	0.320812	0.167142	-4.59e-08	3.13e-08	0.928894
iDnase	HUES48 Cells	Stem-cells	Schizophrenia	25056061	0.216749	0.0303468	2.79208	0.390915	1.17e-05	7.78e-08	3.69e-08	0.0176198
iDnase	HUES64 Cells	Stem-cells	Schizophrenia	25056061	0.2092	0.031092	2.68057	0.398397	5.07e-05	6.53e-08	3.64e-08	0.0365528
iDnase	HUES6 Cells	Stem-cells	Schizophrenia	25056061	0.187028	0.0315924	2.33984	0.395243	0.0010633	3.17e-08	3.81e-08	0.202409
iDnase	IMR90 fetal lung fibroblasts Cell Line	Stem-cells	Schizophrenia	25056061	0.129508	0.030515	1.21172	0.285508	0.458187	-6.6e-08	2.87e-08	0.989292
iDnase	iPS-15b Cells	Stem-cells	Schizophrenia	25056061	0.226943	0.0313641	3.19418	0.441445	2.39e-06	1.2e-07	4.22e-08	0.00230397
iDnase	iPS-18 Cells	Stem-cells	Schizophrenia	25056061	0.218061	0.0329263	2.88531	0.435669	3.62e-05	9e-08	4.35e-08	0.019207
iDnase	iPS-20b Cells	Stem-cells	Schizophrenia	25056061	0.230147	0.0313987	3.13665	0.427932	2.32e-06	1.17e-07	4.11e-08	0.00226968
iDnase	iPS DF 19.11 Cells	Stem-cells	Schizophrenia	25056061	0.163583	0.0301365	2.4309	0.44784	0.00193783	3.47e-08	4.43e-08	0.216532
iDnase	iPS DF 6.9 Cells	Stem-cells	Schizophrenia	25056061	0.183212	0.0284239	3.41662	0.530062	1.54e-05	1.3e-07	5.12e-08	0.00552525
iDnase	Brain Angular Gyrus	Brain	Alzheimer's Disease	24162737	0.470758	0.208927	5.24924	2.32967	0.0522897	-1.17e-09	2.89e-08	0.516148
iDnase	Brain Anterior Caudate	Brain	Alzheimer's Disease	24162737	0.516882	0.206829	5.61066	2.24509	0.0332472	4.6e-09	3.12e-08	0.441298
iDnase	Brain Cingulate Gyrus	Brain	Alzheimer's Disease	24162737	0.561876	0.210945	6.13099	2.30175	0.0173264	1.52e-08	2.79e-08	0.292579
iDnase	Brain Dorsolateral Prefrontal Cortex	Brain	Alzheimer's Disease	24162737	0.606854	0.228739	6.99535	2.63673	0.0138456	2.78e-08	3.33e-08	0.201872
iDnase	Brain Germinal Matrix	Brain	Alzheimer's Disease	24162737	0.34237	0.18733	5.27955	2.88873	0.122801	-5.77e-09	3.17e-08	0.572171
iDnase	Brain Hippocampus Middle	Brain	Alzheimer's Disease	24162737	0.691415	0.244213	6.74149	2.38114	0.00806231	3.37e-08	2.89e-08	0.122021
iDnase	Brain Inferior Temporal Lobe	Brain	Alzheimer's Disease	24162737	0.536405	0.212789	5.96481	2.36621	0.0249591	9.41e-09	2.88e-08	0.371844
iDnase	Brain Substantia Nigra	Brain	Alzheimer's Disease	24162737	0.480566	0.206354	5.28557	2.26961	0.0488719	-3.9e-09	3.08e-08	0.550393
iDnase	Fetal Brain Female	Brain	Alzheimer's Disease	24162737	0.45197	0.181668	4.66644	1.87566	0.0388724	6.54e-09	2.56e-08	0.399352
iDnase	Fetal Brain Male	Brain	Alzheimer's Disease	24162737	0.241724	0.172984	2.94898	2.11037	0.348049	-3.86e-08	2.65e-08	0.927212
iDnase	Cortex derived primary cultured neurospheres	Brain	Alzheimer's Disease	24162737	0.400654	0.187803	5.09502	2.38824	0.0772437	-2.3e-09	2.72e-08	0.533635
iDnase	Ganglion Eminence derived primary cultured neurospheres	Brain	Alzheimer's Disease	24162737	0.3948	0.200371	5.04372	2.55981	0.0960084	-2.94e-09	2.74e-08	0.54273
iDnase	NH-A Astrocytes Primary Cells	Brain	Alzheimer's Disease	24162737	0.482235	0.208377	4.33319	1.8724	0.0519573	1.4e-09	2.31e-08	0.475763
iDnase	H1 Derived Neuronal Progenitor Cultured Cells	Stem-cells	Alzheimer's Disease	24162737	0.557498	0.226839	8.94241	3.63855	0.0160567	4.15e-08	3.94e-08	0.146581
iDnase	H9 Derived Neuronal Progenitor Cultured Cells	Stem-cells	Alzheimer's Disease	24162737	0.551306	0.219564	7.36491	2.93316	0.0168752	2.2e-08	3.2e-08	0.245882
iDnase	H9 Derived Neuron Cultured Cells	Stem-cells	Alzheimer's Disease	24162737	0.408589	0.206726	5.11044	2.58564	0.0955074	-5.3e-09	2.76e-08	0.57623
iDnase	Adipose Nuclei	Adipose	Alzheimer's Disease	24162737	0.674865	0.217772	6.65871	2.1487	0.00369969	3.46e-08	2.52e-08	0.085039
iDnase	Fetal Adrenal Gland	Adrenal	Alzheimer's Disease	24162737	0.469738	0.207016	5.21133	2.29667	0.0526422	-1.71e-09	2.51e-08	0.527199
iDnase	Osteoblast Primary Cells	Bone	Alzheimer's Disease	24162737	0.388123	0.183098	3.53713	1.66865	0.095698	-1.15e-08	2.01e-08	0.717414
iDnase	Colonic Mucosa	Digestive	Alzheimer's Disease	24162737	0.56202	0.221408	7.68127	3.02604	0.0147586	2.4e-08	3.28e-08	0.232508
iDnase	Duodenum Mucosa	Digestive	Alzheimer's Disease	24162737	0.661714	0.247209	8.78298	3.28122	0.00745503	4.7e-08	3.56e-08	0.0935895
iDnase	Esophagus	Digestive	Alzheimer's Disease	24162737	0.485641	0.215072	6.97541	3.08914	0.0363058	8.86e-09	3.62e-08	0.403236
iDnase	Fetal Intestine Large	Digestive	Alzheimer's Disease	24162737	0.587704	0.269183	8.28642	3.79539	0.0349117	3.02e-08	4.21e-08	0.236742
iDnase	Fetal Intestine Small	Digestive	Alzheimer's Disease	24162737	0.670354	0.262573	8.08966	3.16867	0.0123801	4.21e-08	3.45e-08	0.111279
iDnase	Fetal Stomach	Digestive	Alzheimer's Disease	24162737	0.456567	0.190669	5.01197	2.09308	0.0418956	-3.47e-09	2.31e-08	0.559762
iDnase	Gastric	Digestive	Alzheimer's Disease	24162737	0.539959	0.230529	7.9452	3.39211	0.0273232	2.48e-08	3.88e-08	0.261302
iDnase	Rectal Mucosa 1	Digestive	Alzheimer's Disease	24162737	0.637238	0.220015	8.70486	3.00548	0.0032513	4.29e-08	3.28e-08	0.0954309
iDnase	Rectal Mucosa 2	Digestive	Alzheimer's Disease	24162737	0.633964	0.20294	8.74031	2.79789	0.00155639	4.23e-08	2.85e-08	0.0688147
iDnase	Sigmoid Colon	Digestive	Alzheimer's Disease	24162737	0.613714	0.201015	8.69032	2.84641	0.00177899	3.94e-08	2.89e-08	0.0862711
iDnase	Small Intestine	Digestive	Alzheimer's Disease	24162737	0.68893	0.277382	9.40739	3.78766	0.0115035	5.87e-08	4.41e-08	0.0917995
iDnase	Stomach Mucosa	Digestive	Alzheimer's Disease	24162737	0.567777	0.245928	7.28385	3.15494	0.0303669	2.22e-08	3.61e-08	0.269491
iDnase	Breast Myoepithelial Primary Cells	Epithelial	Alzheimer's Disease	24162737	0.428982	0.219426	3.91413	2.00209	0.113547	-1.16e-08	2.34e-08	0.691072
iDnase	Breast variant Human Mammary Epithelial Cells (vHMEC)	Epithelial	Alzheimer's Disease	24162737	0.539001	0.226625	4.76473	2.00335	0.0326286	6.77e-09	2.19e-08	0.378676
iDnase	Foreskin Fibroblast Primary Cells skin 1	Epithelial	Alzheimer's Disease	24162737	0.447137	0.193927	4.0053	1.73713	0.0574391	-8.44e-09	2.11e-08	0.655198
iDnase	Foreskin Fibroblast Primary Cells skin 2	Epithelial	Alzheimer's Disease	24162737	0.517985	0.220127	5.14681	2.18723	0.0339876	5.8e-09	2.42e-08	0.40536
iDnase	Foreskin Keratinocyte Primary Cells skin 1	Epithelial	Alzheimer's Disease	24162737	0.444414	0.201026	4.76452	2.15519	0.0521258	-4.79e-09	2.54e-08	0.574648
iDnase	Foreskin Keratinocyte Primary Cells skin 2	Epithelial	Alzheimer's Disease	24162737	0.556676	0.217496	5.01476	1.95929	0.0168384	8.66e-09	2.18e-08	0.345806
iDnase	Foreskin Melanocyte Primary Cells skin 1	Epithelial	Alzheimer's Disease	24162737	0.39398	0.180598	4.80605	2.20306	0.0649822	-1.04e-08	2.8e-08	0.645297
iDnase	Foreskin Melanocyte Primary Cells skin 2	Epithelial	Alzheimer's Disease	24162737	0.545572	0.21645	4.53304	1.79844	0.0323269	4.2e-09	2.18e-08	0.423427
iDnase	HeLa-S3 Cervical Carcinoma Cell Line	Epithelial	Alzheimer's Disease	24162737	0.547844	0.209221	5.7546	2.19767	0.0141557	1.27e-08	2.58e-08	0.311021
iDnase	HMEC Mammary Epithelial Primary Cells	Epithelial	Alzheimer's Disease	24162737	0.353793	0.177394	3.74977	1.88016	0.110689	-1.72e-08	2.29e-08	0.773249
iDnase	NHDF-Ad Adult Dermal Fibroblast Primary Cells	Epithelial	Alzheimer's Disease	24162737	0.289585	0.169984	3.27413	1.92189	0.207242	-2.29e-08	2.47e-08	0.822432
iDnase	NHEK-Epidermal Keratinocyte Primary Cells	Epithelial	Alzheimer's Disease	24162737	0.566464	0.22195	5.1159	2.0045	0.016986	1.17e-08	2.25e-08	0.300844
iDnase	Aorta	Heart	Alzheimer's Disease	24162737	0.385087	0.176604	5.43545	2.49274	0.0538546	-1.21e-08	2.93e-08	0.660647
iDnase	Fetal Heart	Heart	Alzheimer's Disease	24162737	0.330325	0.189334	3.10454	1.77944	0.217401	-2.55e-08	2.41e-08	0.855308
iDnase	Left Ventricle	Heart	Alzheimer's Disease	24162737	0.457118	0.205682	5.79814	2.6089	0.0474727	-4.1e-09	3.02e-08	0.554083
iDnase	Right Atrium	Heart	Alzheimer's Disease	24162737	0.454569	0.217572	6.39324	3.06001	0.0608146	-1.35e-09	3.39e-08	0.515862
iDnase	Right Ventricle	Heart	Alzheimer's Disease	24162737	0.362043	0.205175	3.87098	2.19374	0.174138	-2.5e-08	2.64e-08	0.828372
iDnase	Dnd41 TCell Leukemia Cell Line	Immune	Alzheimer's Disease	24162737	0.722966	0.239044	9.78838	3.23647	0.000909418	5.66e-08	2.95e-08	0.0276468
iDnase	Fetal Thymus	Immune	Alzheimer's Disease	24162737	0.708216	0.251783	10.3664	3.68543	0.00218865	7.14e-08	4.15e-08	0.0426597
iDnase	GM12878 Lymphoblastoid Cells	Immune	Alzheimer's Disease	24162737	0.696972	0.264287	10.7418	4.07321	0.00352515	7.1e-08	4.66e-08	0.0636378
iDnase	K562 Leukemia Cells	Immune	Alzheimer's Disease	24162737	1.01179	0.291733	12.19	3.51479	7.14e-05	1.18e-07	3.81e-08	0.000987165
iDnase	Monocytes-CD14+ RO01746 Primary Cells	Immune	Alzheimer's Disease	24162737	0.936858	0.228615	11.1039	2.70962	5.98e-06	9.82e-08	3.32e-08	0.00152787
iDnase	Primary B cells from cord blood	Immune	Alzheimer's Disease	24162737	0.804186	0.257456	13.8763	4.44244	0.000173133	1.21e-07	4.52e-08	0.00359898
iDnase	Primary B cells from peripheral blood	Immune	Alzheimer's Disease	24162737	0.730707	0.247256	11.6478	3.94139	0.000487738	8.69e-08	4.07e-08	0.0164301
iDnase	Primary hematopoietic stem cells	Immune	Alzheimer's Disease	24162737	0.763703	0.258316	14.0114	4.73924	0.00103038	1.16e-07	4.99e-08	0.00998154
iDnase	Primary hematopoietic stem cells G-CSF-mobilized Female	Immune	Alzheimer's Disease	24162737	1.00968	0.312265	13.3	4.1133	0.00010162	1.3e-07	4.17e-08	0.000914927
iDnase	Primary hematopoietic stem cells G-CSF-mobilized Male	Immune	Alzheimer's Disease	24162737	0.975201	0.290064	11.7439	3.49311	0.00010223	1.11e-07	3.62e-08	0.00106624
iDnase	Primary hematopoietic stem cells short term culture	Immune	Alzheimer's Disease	24162737	0.879781	0.277495	12.9523	4.08534	0.000246209	1.18e-07	4.26e-08	0.002698
iDnase	Primary monocytes from peripheral blood	Immune	Alzheimer's Disease	24162737	0.830317	0.221296	12.5162	3.33582	2.25e-05	1.11e-07	3.86e-08	0.00208185
iDnase	Primary mononuclear cells from peripheral blood	Immune	Alzheimer's Disease	24162737	0.719601	0.2538	9.02188	3.18198	0.00316897	5.59e-08	3.44e-08	0.0517762
iDnase	Primary Natural Killer cells from peripheral blood	Immune	Alzheimer's Disease	24162737	0.644299	0.22118	10.4128	3.57459	0.00106776	6.39e-08	3.81e-08	0.0466739
iDnase	Primary neutrophils from peripheral blood	Immune	Alzheimer's Disease	24162737	0.899137	0.242411	13.5426	3.65113	5.63e-06	1.27e-07	3.66e-08	0.000259538
iDnase	Primary T CD8+ memory cells from peripheral blood	Immune	Alzheimer's Disease	24162737	0.660756	0.258463	11.5646	4.52363	0.00493329	7.33e-08	4.96e-08	0.0697874
iDnase	Primary T CD8+ naive cells from peripheral blood	Immune	Alzheimer's Disease	24162737	0.55194	0.22649	9.79585	4.01975	0.00964748	4.08e-08	4.33e-08	0.173037
iDnase	Primary T cells effector/memory enriched from peripheral blood	Immune	Alzheimer's Disease	24162737	0.526694	0.220876	10.0036	4.19514	0.0119721	3.93e-08	4.56e-08	0.194831
iDnase	Primary T cells from cord blood	Immune	Alzheimer's Disease	24162737	0.597248	0.235051	12.1089	4.76553	0.00562151	7.45e-08	5.02e-08	0.0687676
iDnase	Primary T cells from peripheral blood	Immune	Alzheimer's Disease	24162737	0.573195	0.217961	9.42982	3.58576	0.00488808	3.93e-08	3.82e-08	0.151725
iDnase	Primary T helper 17 cells PMA-I stimulated	Immune	Alzheimer's Disease	24162737	0.553945	0.217964	8.87532	3.49222	0.00751834	3.26e-08	3.71e-08	0.190253
iDnase	Primary T helper cells from peripheral blood	Immune	Alzheimer's Disease	24162737	0.546787	0.217323	8.85954	3.52126	0.00856231	3.02e-08	3.9e-08	0.218903
iDnase	Primary T helper cells PMA-I stimulated	Immune	Alzheimer's Disease	24162737	0.558651	0.196888	8.11363	2.85952	0.0024017	2.14e-08	2.86e-08	0.227038
iDnase	Primary T helper memory cells from peripheral blood 1	Immune	Alzheimer's Disease	24162737	0.516976	0.208063	9.24647	3.72135	0.00827619	2.95e-08	3.87e-08	0.223082
iDnase	Primary T helper memory cells from peripheral blood 2	Immune	Alzheimer's Disease	24162737	0.570928	0.226928	8.9688	3.56485	0.00775419	3.15e-08	3.79e-08	0.20321
iDnase	Primary T helper naive cells from peripheral blood 1	Immune	Alzheimer's Disease	24162737	0.550204	0.22257	9.43319	3.81593	0.00903331	3.79e-08	4.06e-08	0.175633
iDnase	Primary T helper naive cells from peripheral blood 2	Immune	Alzheimer's Disease	24162737	0.505875	0.197175	8.42964	3.28562	0.00762249	1.65e-08	3.31e-08	0.309065
iDnase	Primary T regulatory cells from peripheral blood	Immune	Alzheimer's Disease	24162737	0.575475	0.209782	9.86289	3.59538	0.00252672	4.53e-08	3.67e-08	0.108739
iDnase	Spleen	Immune	Alzheimer's Disease	24162737	0.823634	0.276344	11.6832	3.91992	0.00148793	1.06e-07	4.77e-08	0.0133402
iDnase	Thymus	Immune	Alzheimer's Disease	24162737	0.652414	0.213263	11.5424	3.773	0.000549764	7.55e-08	3.72e-08	0.0211159
iDnase	Adipose Derived Mesenchymal Stem Cell Cultured Cells	Mesench	Alzheimer's Disease	24162737	0.51516	0.210466	3.90435	1.5951	0.0431777	2.82e-09	2.2e-08	0.448938
iDnase	Bone Marrow Derived Cultured Mesenchymal Stem Cells	Mesench	Alzheimer's Disease	24162737	0.250848	0.172734	2.23078	1.53612	0.404414	-3.35e-08	2.3e-08	0.927518
iDnase	Mesenchymal Stem Cell Derived Adipocyte Cultured Cells	Mesench	Alzheimer's Disease	24162737	0.454367	0.20886	3.57519	1.64342	0.0882861	-5.33e-09	2.3e-08	0.591555
iDnase	Mesenchymal Stem Cell Derived Chondrocyte Cultured Cells	Mesench	Alzheimer's Disease	24162737	0.280066	0.175813	2.33298	1.46455	0.342813	-3.32e-08	2.27e-08	0.92805
iDnase	Fetal Muscle Leg	Muscle	Alzheimer's Disease	24162737	0.419505	0.217424	4.9993	2.59107	0.107983	-1.08e-08	2.78e-08	0.650948
iDnase	Fetal Muscle Trunk	Muscle	Alzheimer's Disease	24162737	0.460104	0.216089	5.83161	2.73883	0.059473	-1.52e-12	2.87e-08	0.500021
iDnase	HSMM cell derived Skeletal Muscle Myotubes Cells	Muscle	Alzheimer's Disease	24162737	0.3768	0.208421	3.36855	1.86326	0.175447	-1.35e-08	2.49e-08	0.706274
iDnase	HSMM Skeletal Muscle Myoblasts Cells	Muscle	Alzheimer's Disease	24162737	0.410171	0.196019	4.09107	1.9551	0.0904551	-7.68e-09	2.58e-08	0.617219
iDnase	Muscle Satellite Cultured Cells	Muscle	Alzheimer's Disease	24162737	0.475545	0.219604	4.09357	1.89039	0.0702363	-4.75e-10	2.26e-08	0.508384
iDnase	Psoas Muscle	Muscle	Alzheimer's Disease	24162737	0.553881	0.230303	6.25736	2.6018	0.0257784	1.69e-08	3.09e-08	0.292843
iDnase	Skeletal Muscle Female	Muscle	Alzheimer's Disease	24162737	0.578446	0.20443	5.7366	2.02739	0.012005	1.53e-08	2.61e-08	0.279037
iDnase	Skeletal Muscle Male	Muscle	Alzheimer's Disease	24162737	0.422861	0.192553	5.05585	2.30221	0.0619964	-1.11e-08	2.75e-08	0.656631
iDnase	A549 EtOH 0.02pct Lung Carcinoma Cell Line	Other	Alzheimer's Disease	24162737	0.662318	0.196719	5.75472	1.70925	0.00163136	2.31e-08	2.02e-08	0.126326
iDnase	Fetal Kidney	Other	Alzheimer's Disease	24162737	0.334204	0.183989	4.14329	2.281	0.150145	-1.73e-08	2.96e-08	0.720354
iDnase	Fetal Lung	Other	Alzheimer's Disease	24162737	0.309371	0.190388	3.45593	2.1268	0.23715	-3.37e-08	2.71e-08	0.893019
iDnase	HepG2 Hepatocellular Carcinoma Cell Line	Other	Alzheimer's Disease	24162737	0.719369	0.270502	7.28803	2.74049	0.00652311	3.87e-08	3.1e-08	0.105369
iDnase	HUVEC Umbilical Vein Endothelial Primary Cells	Other	Alzheimer's Disease	24162737	0.53302	0.198207	5.28762	1.96624	0.0174763	1.06e-08	2.31e-08	0.322914
iDnase	Liver	Other	Alzheimer's Disease	24162737	0.900926	0.326962	10.342	3.7533	0.00273316	8.94e-08	4.22e-08	0.0171329
iDnase	Lung	Other	Alzheimer's Disease	24162737	0.549169	0.231062	7.72678	3.25103	0.0236452	2.34e-08	3.76e-08	0.267111
iDnase	NHLF Lung Fibroblast Primary Cells	Other	Alzheimer's Disease	24162737	0.382176	0.170223	4.26875	1.90132	0.0638224	-7.8e-09	2.51e-08	0.622203
iDnase	Ovary	Other	Alzheimer's Disease	24162737	0.42794	0.184311	5.6569	2.43639	0.0462423	-5.91e-09	3.13e-08	0.575025
iDnase	Pancreas	Other	Alzheimer's Disease	24162737	0.512137	0.25799	8.36894	4.21586	0.0604385	2.57e-08	4.94e-08	0.30142
iDnase	Pancreatic Islets	Other	Alzheimer's Disease	24162737	0.532632	0.243544	9.2578	4.2331	0.0303175	3.28e-08	4.45e-08	0.230928
iDnase	Placenta	Other	Alzheimer's Disease	24162737	0.74709	0.21171	9.52382	2.69886	0.000232839	7.23e-08	2.96e-08	0.00730488
iDnase	Placenta Amnion	Other	Alzheimer's Disease	24162737	0.491826	0.232803	4.98623	2.3602	0.0607407	2.49e-09	2.75e-08	0.463905
iDnase	Colon Smooth Muscle	Sm. Muscle	Alzheimer's Disease	24162737	0.399483	0.181917	4.44984	2.02638	0.0701545	-1.85e-08	2.33e-08	0.786564
iDnase	Duodenum Smooth Muscle	Sm. Muscle	Alzheimer's Disease	24162737	0.559098	0.213339	5.71085	2.17914	0.0191382	8.7e-09	2.56e-08	0.367155
iDnase	Rectal Smooth Muscle	Sm. Muscle	Alzheimer's Disease	24162737	0.33428	0.168634	4.51054	2.27542	0.105418	-3.5e-08	2.56e-08	0.914177
iDnase	Stomach Smooth Muscle	Sm. Muscle	Alzheimer's Disease	24162737	0.387182	0.180684	4.87836	2.27655	0.0699339	-2.26e-08	2.43e-08	0.824138
iDnase	ES-I3 Cells	Stem-cells	Alzheimer's Disease	24162737	0.53181	0.246897	5.81591	2.70008	0.0490966	1.04e-08	3.23e-08	0.374069
iDnase	ES-UCSF4 Cells	Stem-cells	Alzheimer's Disease	24162737	0.587799	0.221789	8.63747	3.25911	0.00971722	4.09e-08	3.93e-08	0.148878
iDnase	ES-WA7 Cells	Stem-cells	Alzheimer's Disease	24162737	0.678551	0.289062	10.5364	4.48848	0.0179303	6.86e-08	5.19e-08	0.0929818
iDnase	H1 BMP4 Derived Mesendoderm Cultured Cells	Stem-cells	Alzheimer's Disease	24162737	0.592529	0.219394	8.74263	3.23712	0.00632668	4.21e-08	3.28e-08	0.099286
iDnase	H1 BMP4 Derived Trophoblast Cultured Cells	Stem-cells	Alzheimer's Disease	24162737	0.544429	0.21208	6.21454	2.42085	0.0171596	1.65e-08	2.92e-08	0.286308
iDnase	H1 Cells	Stem-cells	Alzheimer's Disease	24162737	0.569721	0.229991	8.774	3.54199	0.0142683	3.8e-08	4.02e-08	0.171776
iDnase	H1 Derived Mesenchymal Stem Cells	Stem-cells	Alzheimer's Disease	24162737	0.425364	0.191375	4.89427	2.20197	0.0577211	-3.99e-09	2.88e-08	0.555063
iDnase	H9 Cells	Stem-cells	Alzheimer's Disease	24162737	0.627194	0.240282	10.88	4.16817	0.00755279	6.61e-08	4.59e-08	0.0747961
iDnase	hESC Derived CD184+ Endoderm Cultured Cells	Stem-cells	Alzheimer's Disease	24162737	0.432599	0.201616	4.19581	1.9555	0.0877343	-9.87e-09	2.66e-08	0.644768
iDnase	hESC Derived CD56+ Ectoderm Cultured Cells	Stem-cells	Alzheimer's Disease	24162737	0.57071	0.218195	8.62742	3.29846	0.0104407	3.84e-08	3.63e-08	0.145265
iDnase	hESC Derived CD56+ Mesoderm Cultured Cells	Stem-cells	Alzheimer's Disease	24162737	0.471529	0.218795	4.53977	2.1065	0.0632557	-9.32e-10	2.46e-08	0.515112
iDnase	HUES48 Cells	Stem-cells	Alzheimer's Disease	24162737	0.670277	0.257568	8.63423	3.31788	0.00797896	5.01e-08	3.75e-08	0.0910429
iDnase	HUES64 Cells	Stem-cells	Alzheimer's Disease	24162737	0.697301	0.250654	8.93484	3.21175	0.00356297	5.65e-08	3.36e-08	0.0464263
iDnase	HUES6 Cells	Stem-cells	Alzheimer's Disease	24162737	0.642895	0.262926	8.04305	3.28938	0.0159522	4.22e-08	3.77e-08	0.131431
iDnase	IMR90 fetal lung fibroblasts Cell Line	Stem-cells	Alzheimer's Disease	24162737	0.412931	0.187266	3.86352	1.75212	0.075317	-1.06e-08	2.31e-08	0.676604
iDnase	iPS-15b Cells	Stem-cells	Alzheimer's Disease	24162737	0.612055	0.268096	8.61459	3.77342	0.0259025	4.27e-08	4.48e-08	0.170145
iDnase	iPS-18 Cells	Stem-cells	Alzheimer's Disease	24162737	0.769763	0.26663	10.1852	3.52795	0.00238448	7.86e-08	4.06e-08	0.0264275
iDnase	iPS-20b Cells	Stem-cells	Alzheimer's Disease	24162737	0.659952	0.243231	8.99444	3.31498	0.00560283	5.29e-08	3.62e-08	0.0722029
iDnase	iPS DF 19.11 Cells	Stem-cells	Alzheimer's Disease	24162737	0.601003	0.25665	8.93113	3.81392	0.0208352	4.4e-08	4.51e-08	0.164645
iDnase	iPS DF 6.9 Cells	Stem-cells	Alzheimer's Disease	24162737	0.674019	0.256222	12.5694	4.77814	0.00604989	9.1e-08	5.36e-08	0.0448159
iDnase	Brain Angular Gyrus	Brain	ADHD	-	0.316194	0.060629	3.52576	0.67605	0.000185584	1.15e-07	3.15e-08	0.000124757
iDnase	Brain Anterior Caudate	Brain	ADHD	-	0.276989	0.0606966	3.00666	0.65885	0.00246557	8.97e-08	3.1e-08	0.00191678
iDnase	Brain Cingulate Gyrus	Brain	ADHD	-	0.259978	0.0592475	2.83678	0.646487	0.00489735	7.64e-08	3e-08	0.00547446
iDnase	Brain Dorsolateral Prefrontal Cortex	Brain	ADHD	-	0.263871	0.059619	3.0417	0.687242	0.00306713	9.31e-08	3.34e-08	0.00264679
iDnase	Brain Germinal Matrix	Brain	ADHD	-	0.399957	0.058485	6.16758	0.901873	2.46e-08	2.3e-07	3.58e-08	7.17e-11
iDnase	Brain Hippocampus Middle	Brain	ADHD	-	0.254575	0.059349	2.48218	0.578669	0.0110681	6.25e-08	2.79e-08	0.0126363
iDnase	Brain Inferior Temporal Lobe	Brain	ADHD	-	0.26568	0.0586952	2.95435	0.652689	0.00280468	8.42e-08	3.04e-08	0.0028413
iDnase	Brain Substantia Nigra	Brain	ADHD	-	0.183734	0.0575617	2.02083	0.633101	0.108269	2.8e-08	2.95e-08	0.170946
iDnase	Fetal Brain Female	Brain	ADHD	-	0.410816	0.0669545	4.24154	0.691283	4.2e-06	1.47e-07	3.02e-08	5.81e-07
iDnase	Fetal Brain Male	Brain	ADHD	-	0.347436	0.0605944	4.23864	0.739239	1.73e-05	1.48e-07	3.29e-08	3.48e-06
iDnase	Cortex derived primary cultured neurospheres	Brain	ADHD	-	0.389908	0.0623128	4.95836	0.792415	1.45e-06	1.78e-07	3.42e-08	9.35e-08
iDnase	Ganglion Eminence derived primary cultured neurospheres	Brain	ADHD	-	0.374918	0.0624162	4.78971	0.79739	2.82e-06	1.68e-07	3.37e-08	3.2e-07
iDnase	NH-A Astrocytes Primary Cells	Brain	ADHD	-	0.0443793	0.0558201	0.398776	0.501579	0.230148	-4.32e-08	2.36e-08	0.966406
iDnase	H1 Derived Neuronal Progenitor Cultured Cells	Stem-cells	ADHD	-	0.146834	0.0577806	2.35525	0.926815	0.148291	4.64e-08	4.3e-08	0.140045
iDnase	H9 Derived Neuronal Progenitor Cultured Cells	Stem-cells	ADHD	-	0.224039	0.0587041	2.99294	0.78423	0.0105514	8.38e-08	3.73e-08	0.012443
iDnase	H9 Derived Neuron Cultured Cells	Stem-cells	ADHD	-	0.359388	0.0635597	4.49506	0.794975	9.18e-06	1.56e-07	3.51e-08	4.46e-06
iDnase	Adipose Nuclei	Adipose	ADHD	-	0.115295	0.0575766	1.13759	0.568092	0.808944	-1.7e-08	2.81e-08	0.727125
iDnase	Fetal Adrenal Gland	Adrenal	ADHD	-	0.179465	0.0577768	1.99101	0.640983	0.124613	3.34e-08	2.99e-08	0.132035
iDnase	Osteoblast Primary Cells	Bone	ADHD	-	0.0268087	0.0507015	0.244319	0.462065	0.10116	-5.17e-08	2.22e-08	0.990028
iDnase	Colonic Mucosa	Digestive	ADHD	-	0.0662126	0.0534701	0.904944	0.730789	0.896505	-2.87e-08	3.51e-08	0.792853
iDnase	Duodenum Mucosa	Digestive	ADHD	-	0.0685539	0.0496784	0.90992	0.659385	0.891461	-2.4e-08	3.1e-08	0.781018
iDnase	Esophagus	Digestive	ADHD	-	-0.00712984	0.0512237	-0.102408	0.735741	0.134027	-8.21e-08	3.44e-08	0.991517
iDnase	Fetal Intestine Large	Digestive	ADHD	-	0.0601498	0.0486381	0.848092	0.685782	0.824693	-3.19e-08	2.99e-08	0.856903
iDnase	Fetal Intestine Small	Digestive	ADHD	-	0.0468152	0.0516964	0.564953	0.623858	0.484288	-4.99e-08	2.81e-08	0.961739
iDnase	Fetal Stomach	Digestive	ADHD	-	0.121007	0.0563875	1.32836	0.618995	0.596819	-1.4e-08	3e-08	0.68037
iDnase	Gastric	Digestive	ADHD	-	0.040961	0.0509845	0.602719	0.75021	0.596181	-4.13e-08	3.51e-08	0.880408
iDnase	Rectal Mucosa 1	Digestive	ADHD	-	0.0217228	0.0507848	0.296739	0.693735	0.30977	-6.66e-08	3.37e-08	0.975822
iDnase	Rectal Mucosa 2	Digestive	ADHD	-	0.0178373	0.0471411	0.245918	0.649923	0.244476	-6.54e-08	3.05e-08	0.98402
iDnase	Sigmoid Colon	Digestive	ADHD	-	0.0296669	0.0487249	0.420089	0.689955	0.400506	-5.5e-08	3.23e-08	0.955624
iDnase	Small Intestine	Digestive	ADHD	-	0.013507	0.0511912	0.184439	0.699019	0.242955	-7.22e-08	3.57e-08	0.978455
iDnase	Stomach Mucosa	Digestive	ADHD	-	0.0264062	0.0480466	0.338758	0.616376	0.282071	-6.23e-08	3.04e-08	0.979903
iDnase	Breast Myoepithelial Primary Cells	Epithelial	ADHD	-	0.0879852	0.05829	0.802799	0.531852	0.71062	-2.32e-08	2.45e-08	0.827592
iDnase	Breast variant Human Mammary Epithelial Cells (vHMEC)	Epithelial	ADHD	-	0.0497657	0.0542755	0.439926	0.479791	0.242368	-3.45e-08	2.17e-08	0.943811
iDnase	Foreskin Fibroblast Primary Cells skin 1	Epithelial	ADHD	-	0.0628454	0.0548617	0.562948	0.491433	0.372084	-3.77e-08	2.33e-08	0.946994
iDnase	Foreskin Fibroblast Primary Cells skin 2	Epithelial	ADHD	-	0.0784998	0.0545188	0.779991	0.54171	0.684204	-2.55e-08	2.61e-08	0.835092
iDnase	Foreskin Keratinocyte Primary Cells skin 1	Epithelial	ADHD	-	0.0239955	0.05438	0.257254	0.583003	0.20036	-4.85e-08	2.69e-08	0.964203
iDnase	Foreskin Keratinocyte Primary Cells skin 2	Epithelial	ADHD	-	0.0490484	0.0557648	0.441848	0.502351	0.264846	-3.56e-08	2.31e-08	0.938075
iDnase	Foreskin Melanocyte Primary Cells skin 1	Epithelial	ADHD	-	0.0503774	0.0561626	0.614541	0.685113	0.572977	-3.35e-08	3.16e-08	0.855531
iDnase	Foreskin Melanocyte Primary Cells skin 2	Epithelial	ADHD	-	0.0942243	0.0622205	0.78289	0.516976	0.674062	-2.69e-08	2.42e-08	0.866938
iDnase	HeLa-S3 Cervical Carcinoma Cell Line	Epithelial	ADHD	-	-0.00460566	0.0510019	-0.0483783	0.535729	0.0481005	-6.79e-08	2.45e-08	0.997217
iDnase	HMEC Mammary Epithelial Primary Cells	Epithelial	ADHD	-	-0.00875264	0.0519135	-0.0927672	0.55022	0.0467379	-6.18e-08	2.48e-08	0.993623
iDnase	NHDF-Ad Adult Dermal Fibroblast Primary Cells	Epithelial	ADHD	-	0.033183	0.0506058	0.375176	0.572163	0.275686	-4.1e-08	2.56e-08	0.945154
iDnase	NHEK-Epidermal Keratinocyte Primary Cells	Epithelial	ADHD	-	0.0186786	0.0546431	0.168692	0.493498	0.0905697	-4.99e-08	2.28e-08	0.985632
iDnase	Aorta	Heart	ADHD	-	0.0109125	0.0526658	0.154029	0.743372	0.253928	-6.29e-08	3.47e-08	0.96479
iDnase	Fetal Heart	Heart	ADHD	-	0.0807352	0.061721	0.758785	0.580081	0.677217	-4.41e-08	2.92e-08	0.934511
iDnase	Left Ventricle	Heart	ADHD	-	0.0686534	0.0504307	0.870809	0.639669	0.839743	-3.3e-08	3.04e-08	0.861299
iDnase	Right Atrium	Heart	ADHD	-	0.0486295	0.0490823	0.683944	0.690313	0.646213	-4.5e-08	3.33e-08	0.912045
iDnase	Right Ventricle	Heart	ADHD	-	0.0833714	0.0598419	0.891413	0.639833	0.86506	-3.14e-08	3.14e-08	0.841766
iDnase	Dnd41 TCell Leukemia Cell Line	Immune	ADHD	-	0.103809	0.0498283	1.40549	0.674636	0.548966	1.64e-08	3.28e-08	0.308201
iDnase	Fetal Thymus	Immune	ADHD	-	0.0576128	0.0481323	0.843298	0.704528	0.823861	-2.62e-08	3.53e-08	0.77143
iDnase	GM12878 Lymphoblastoid Cells	Immune	ADHD	-	0.0282109	0.0459921	0.434788	0.708833	0.425363	-4.57e-08	3.67e-08	0.893732
iDnase	K562 Leukemia Cells	Immune	ADHD	-	0.039011	0.052905	0.470005	0.637399	0.404997	-4.43e-08	3.42e-08	0.902814
iDnase	Monocytes-CD14+ RO01746 Primary Cells	Immune	ADHD	-	0.12331	0.0425907	1.46151	0.504798	0.361577	2.29e-08	2.29e-08	0.157967
iDnase	Primary B cells from cord blood	Immune	ADHD	-	0.0546145	0.0419282	0.94238	0.723476	0.936506	-1.08e-08	3.73e-08	0.613881
iDnase	Primary B cells from peripheral blood	Immune	ADHD	-	0.0435551	0.0410572	0.69429	0.654472	0.639348	-2.88e-08	3.21e-08	0.814888
iDnase	Primary hematopoietic stem cells	Immune	ADHD	-	0.123392	0.0459682	2.26384	0.843364	0.133669	6.37e-08	3.84e-08	0.048674
iDnase	Primary hematopoietic stem cells G-CSF-mobilized Female	Immune	ADHD	-	0.15127	0.0498462	1.99259	0.656598	0.131039	5.2e-08	3.15e-08	0.0492198
iDnase	Primary hematopoietic stem cells G-CSF-mobilized Male	Immune	ADHD	-	0.150712	0.0474177	1.81496	0.57103	0.153719	3.71e-08	2.71e-08	0.0854436
iDnase	Primary hematopoietic stem cells short term culture	Immune	ADHD	-	0.118258	0.0465949	1.74103	0.685981	0.279708	3.29e-08	3.27e-08	0.156833
iDnase	Primary monocytes from peripheral blood	Immune	ADHD	-	0.0844243	0.0425411	1.27261	0.641266	0.671296	1.19e-08	2.88e-08	0.340052
iDnase	Primary mononuclear cells from peripheral blood	Immune	ADHD	-	0.0712486	0.056804	0.893268	0.712171	0.880794	-1.98e-08	3.45e-08	0.717175
iDnase	Primary Natural Killer cells from peripheral blood	Immune	ADHD	-	0.0351754	0.04224	0.568486	0.682659	0.526276	-3.63e-08	3.26e-08	0.867419
iDnase	Primary neutrophils from peripheral blood	Immune	ADHD	-	0.0902136	0.0418922	1.35877	0.630969	0.569655	1.8e-08	2.88e-08	0.26586
iDnase	Primary T CD8+ memory cells from peripheral blood	Immune	ADHD	-	0.0354578	0.0459159	0.620584	0.803623	0.635833	-3.02e-08	3.9e-08	0.780465
iDnase	Primary T CD8+ naive cells from peripheral blood	Immune	ADHD	-	0.0405591	0.044669	0.719844	0.792787	0.723217	-2.54e-08	3.74e-08	0.750882
iDnase	Primary T cells effector/memory enriched from peripheral blood	Immune	ADHD	-	0.0433116	0.0433829	0.822626	0.82398	0.82943	-1.75e-08	3.87e-08	0.674118
iDnase	Primary T cells from cord blood	Immune	ADHD	-	0.0781441	0.0426839	1.58433	0.865392	0.500508	2.59e-08	3.99e-08	0.258153
iDnase	Primary T cells from peripheral blood	Immune	ADHD	-	0.0576399	0.0461376	0.948254	0.759026	0.945624	-1.7e-08	3.67e-08	0.678337
iDnase	Primary T helper 17 cells PMA-I stimulated	Immune	ADHD	-	0.0737054	0.0478098	1.18091	0.76601	0.813526	4.38e-09	3.87e-08	0.454903
iDnase	Primary T helper cells from peripheral blood	Immune	ADHD	-	0.0593555	0.0448112	0.961732	0.726072	0.957951	-1.2e-08	3.51e-08	0.633461
iDnase	Primary T helper cells PMA-I stimulated	Immune	ADHD	-	0.0742048	0.0436523	1.07772	0.63399	0.902416	-2.79e-09	3.16e-08	0.535216
iDnase	Primary T helper memory cells from peripheral blood 1	Immune	ADHD	-	0.0556799	0.0434344	0.995873	0.776854	0.995763	-5.9e-09	3.64e-08	0.564337
iDnase	Primary T helper memory cells from peripheral blood 2	Immune	ADHD	-	0.0641689	0.047544	1.00804	0.746877	0.991411	-5.97e-09	3.73e-08	0.563639
iDnase	Primary T helper naive cells from peripheral blood 1	Immune	ADHD	-	0.0434543	0.0474549	0.74502	0.813609	0.75357	-2.26e-08	3.95e-08	0.716594
iDnase	Primary T helper naive cells from peripheral blood 2	Immune	ADHD	-	0.0727467	0.0434146	1.21221	0.723439	0.769598	4.98e-09	3.49e-08	0.44314
iDnase	Primary T regulatory cells from peripheral blood	Immune	ADHD	-	0.0686957	0.0453452	1.17735	0.777159	0.819472	7.33e-09	3.79e-08	0.423454
iDnase	Spleen	Immune	ADHD	-	0.057656	0.0517795	0.817845	0.734487	0.803954	-3.27e-08	3.72e-08	0.810259
iDnase	Thymus	Immune	ADHD	-	0.0599633	0.0459375	1.06086	0.812715	0.940332	-8.11e-09	3.89e-08	0.58266
iDnase	Adipose Derived Mesenchymal Stem Cell Cultured Cells	Mesench	ADHD	-	0.0665214	0.0606759	0.504159	0.459857	0.278483	-4.3e-08	2.38e-08	0.964829
iDnase	Bone Marrow Derived Cultured Mesenchymal Stem Cells	Mesench	ADHD	-	0.0239601	0.0525998	0.213076	0.467769	0.0919916	-5.45e-08	2.21e-08	0.993139
iDnase	Mesenchymal Stem Cell Derived Adipocyte Cultured Cells	Mesench	ADHD	-	0.0618475	0.060014	0.486648	0.472221	0.274158	-4.46e-08	2.35e-08	0.971264
iDnase	Mesenchymal Stem Cell Derived Chondrocyte Cultured Cells	Mesench	ADHD	-	0.0381637	0.0539569	0.317907	0.449467	0.128405	-5.37e-08	2.17e-08	0.993477
iDnase	Fetal Muscle Leg	Muscle	ADHD	-	0.132841	0.0536161	1.58308	0.63895	0.363501	4.01e-09	2.99e-08	0.446583
iDnase	Fetal Muscle Trunk	Muscle	ADHD	-	0.132577	0.0558866	1.68035	0.708338	0.339024	9.45e-09	3.42e-08	0.39116
iDnase	HSMM cell derived Skeletal Muscle Myotubes Cells	Muscle	ADHD	-	0.0725581	0.0550451	0.648661	0.492097	0.475685	-3.16e-08	2.35e-08	0.910435
iDnase	HSMM Skeletal Muscle Myoblasts Cells	Muscle	ADHD	-	0.0738846	0.0555921	0.736931	0.55448	0.635594	-2.33e-08	2.57e-08	0.816748
iDnase	Muscle Satellite Cultured Cells	Muscle	ADHD	-	0.0806637	0.0537494	0.694367	0.462684	0.509063	-2.77e-08	2.28e-08	0.887641
iDnase	Psoas Muscle	Muscle	ADHD	-	0.0708998	0.056816	0.800977	0.641868	0.756579	-3.19e-08	3.08e-08	0.849637
iDnase	Skeletal Muscle Female	Muscle	ADHD	-	0.145872	0.051044	1.44665	0.506216	0.379379	4.81e-09	2.54e-08	0.424938
iDnase	Skeletal Muscle Male	Muscle	ADHD	-	0.149555	0.0500037	1.78812	0.597859	0.188404	1.8e-08	2.82e-08	0.261426
iDnase	A549 EtOH 0.02pct Lung Carcinoma Cell Line	Other	ADHD	-	0.0254591	0.05153	0.221207	0.447731	0.0788331	-6.1e-08	2.26e-08	0.996499
iDnase	Fetal Kidney	Other	ADHD	-	0.0805528	0.0640905	0.998653	0.794561	0.998647	-2.79e-08	3.63e-08	0.778826
iDnase	Fetal Lung	Other	ADHD	-	0.11159	0.0625277	1.24655	0.698487	0.724217	-1.86e-08	3.38e-08	0.709102
iDnase	HepG2 Hepatocellular Carcinoma Cell Line	Other	ADHD	-	-0.0452254	0.0555409	-0.458186	0.562693	0.00953708	-1.07e-07	2.98e-08	0.999827
iDnase	HUVEC Umbilical Vein Endothelial Primary Cells	Other	ADHD	-	0.0411957	0.0534554	0.408667	0.530284	0.263863	-4.58e-08	2.68e-08	0.956063
iDnase	Liver	Other	ADHD	-	0.026816	0.0503884	0.30783	0.578426	0.232065	-7.01e-08	2.89e-08	0.992273
iDnase	Lung	Other	ADHD	-	0.0354164	0.0500713	0.498307	0.7045	0.476249	-5.35e-08	3.53e-08	0.935141
iDnase	NHLF Lung Fibroblast Primary Cells	Other	ADHD	-	0.0631977	0.0549656	0.705893	0.613944	0.632121	-2.65e-08	2.87e-08	0.821859
iDnase	Ovary	Other	ADHD	-	0.0866734	0.0581216	1.14573	0.768305	0.849596	-1.29e-08	3.64e-08	0.638664
iDnase	Pancreas	Other	ADHD	-	0.0385919	0.0506357	0.630639	0.827448	0.655395	-3.96e-08	3.75e-08	0.854415
iDnase	Pancreatic Islets	Other	ADHD	-	0.0642874	0.0554204	1.11739	0.963275	0.903019	-1.21e-08	4.49e-08	0.605996
iDnase	Placenta	Other	ADHD	-	0.107731	0.0504537	1.37335	0.643178	0.563355	-3.37e-10	3.08e-08	0.504359
iDnase	Placenta Amnion	Other	ADHD	-	0.0120363	0.0568939	0.122027	0.5768	0.123442	-6.15e-08	2.7e-08	0.988755
iDnase	Colon Smooth Muscle	Sm. Muscle	ADHD	-	0.111851	0.0536894	1.24591	0.598047	0.681138	-1.53e-08	2.93e-08	0.699136
iDnase	Duodenum Smooth Muscle	Sm. Muscle	ADHD	-	0.0739723	0.0591079	0.755584	0.603753	0.685773	-3.77e-08	3.1e-08	0.88781
iDnase	Rectal Smooth Muscle	Sm. Muscle	ADHD	-	0.073147	0.0502858	0.986995	0.678522	0.98471	-2.86e-08	3.25e-08	0.810826
iDnase	Stomach Smooth Muscle	Sm. Muscle	ADHD	-	0.103589	0.0510043	1.30519	0.642636	0.63515	-1.17e-08	3.07e-08	0.648512
iDnase	ES-I3 Cells	Stem-cells	ADHD	-	0.148343	0.0622163	1.62229	0.680402	0.361886	1.21e-08	3.48e-08	0.364697
iDnase	ES-UCSF4 Cells	Stem-cells	ADHD	-	0.235818	0.0529881	3.46525	0.77864	0.00189456	1.15e-07	3.76e-08	0.00113866
iDnase	ES-WA7 Cells	Stem-cells	ADHD	-	0.083909	0.0533311	1.30292	0.828112	0.715007	2.86e-09	3.97e-08	0.471291
iDnase	H1 BMP4 Derived Mesendoderm Cultured Cells	Stem-cells	ADHD	-	0.123038	0.0573182	1.81539	0.845718	0.337063	2.32e-08	3.98e-08	0.279902
iDnase	H1 BMP4 Derived Trophoblast Cultured Cells	Stem-cells	ADHD	-	0.045256	0.0551864	0.516587	0.629941	0.440057	-4.48e-08	3e-08	0.932441
iDnase	H1 Cells	Stem-cells	ADHD	-	0.17875	0.0556598	2.75285	0.857191	0.0419816	7.09e-08	4.2e-08	0.04573
iDnase	H1 Derived Mesenchymal Stem Cells	Stem-cells	ADHD	-	0.0262184	0.053062	0.30167	0.610534	0.253076	-5.16e-08	2.89e-08	0.963101
iDnase	H9 Cells	Stem-cells	ADHD	-	0.209367	0.0561602	3.6319	0.974213	0.00805809	1.21e-07	4.53e-08	0.00385013
iDnase	hESC Derived CD184+ Endoderm Cultured Cells	Stem-cells	ADHD	-	0.168562	0.0650528	1.6349	0.630953	0.315313	8.39e-09	3.21e-08	0.39674
iDnase	hESC Derived CD56+ Ectoderm Cultured Cells	Stem-cells	ADHD	-	0.229929	0.056516	3.47583	0.854352	0.00418775	1.03e-07	4.1e-08	0.00601504
iDnase	hESC Derived CD56+ Mesoderm Cultured Cells	Stem-cells	ADHD	-	0.111929	0.0590594	1.07762	0.56861	0.891566	-1.34e-08	2.71e-08	0.688993
iDnase	HUES48 Cells	Stem-cells	ADHD	-	0.250964	0.0556604	3.23281	0.716994	0.00191406	9.72e-08	3.44e-08	0.00238388
iDnase	HUES64 Cells	Stem-cells	ADHD	-	0.206796	0.0581043	2.64977	0.744518	0.0275912	6.38e-08	3.59e-08	0.0378246
iDnase	HUES6 Cells	Stem-cells	ADHD	-	0.174019	0.0565164	2.1771	0.707058	0.0991862	4.01e-08	3.51e-08	0.126156
iDnase	IMR90 fetal lung fibroblasts Cell Line	Stem-cells	ADHD	-	0.0673524	0.0550222	0.630172	0.514806	0.471512	-3.42e-08	2.45e-08	0.918222
iDnase	iPS-15b Cells	Stem-cells	ADHD	-	0.211424	0.0539358	2.97577	0.759139	0.0100395	8.34e-08	3.64e-08	0.0109781
iDnase	iPS-18 Cells	Stem-cells	ADHD	-	0.244951	0.0578565	3.24111	0.765539	0.00341671	9.95e-08	3.64e-08	0.00311205
iDnase	iPS-20b Cells	Stem-cells	ADHD	-	0.217014	0.0564349	2.95767	0.769148	0.0112721	8.37e-08	3.59e-08	0.00995021
iDnase	iPS DF 19.11 Cells	Stem-cells	ADHD	-	0.181383	0.0555222	2.69542	0.82508	0.041077	7.75e-08	4.05e-08	0.027928
iDnase	iPS DF 6.9 Cells	Stem-cells	ADHD	-	0.171628	0.0542026	3.2006	1.0108	0.0315822	9.99e-08	4.72e-08	0.0170513
iDnase	Brain Angular Gyrus	Brain	Autism	-	0.274836	0.070771	3.06459	0.78914	0.0156245	6.35e-08	3.52e-08	0.0356055
iDnase	Brain Anterior Caudate	Brain	Autism	-	0.197592	0.0696415	2.14482	0.755946	0.14867	1.68e-08	3.29e-08	0.305155
iDnase	Brain Cingulate Gyrus	Brain	Autism	-	0.236767	0.0688057	2.58351	0.750783	0.047213	4.1e-08	3.26e-08	0.104786
iDnase	Brain Dorsolateral Prefrontal Cortex	Brain	Autism	-	0.215049	0.0703677	2.47892	0.811145	0.0858126	3.65e-08	3.6e-08	0.155515
iDnase	Brain Germinal Matrix	Brain	Autism	-	0.279691	0.0660298	4.313	1.01822	0.00316432	9.97e-08	3.89e-08	0.00515297
iDnase	Brain Hippocampus Middle	Brain	Autism	-	0.217557	0.0684091	2.12124	0.667007	0.110873	2.03e-08	3.05e-08	0.252936
iDnase	Brain Inferior Temporal Lobe	Brain	Autism	-	0.244234	0.0695157	2.71587	0.773012	0.0385825	4.84e-08	3.46e-08	0.0807459
iDnase	Brain Substantia Nigra	Brain	Autism	-	0.151932	0.0677838	1.67105	0.74553	0.379262	-7.87e-09	3.07e-08	0.601295
iDnase	Fetal Brain Female	Brain	Autism	-	0.277831	0.0742895	2.86851	0.767014	0.0243649	4.74e-08	3.09e-08	0.0625775
iDnase	Fetal Brain Male	Brain	Autism	-	0.267022	0.0733767	3.25761	0.895181	0.0213767	6.47e-08	3.67e-08	0.0388346
iDnase	Cortex derived primary cultured neurospheres	Brain	Autism	-	0.251539	0.0712805	3.19875	0.906456	0.0262776	5.66e-08	3.67e-08	0.0617398
iDnase	Ganglion Eminence derived primary cultured neurospheres	Brain	Autism	-	0.25244	0.0745939	3.22501	0.952965	0.0318738	5.75e-08	3.94e-08	0.0721867
iDnase	NH-A Astrocytes Primary Cells	Brain	Autism	-	0.0994664	0.0845385	0.893768	0.759632	0.887684	-2.98e-08	2.88e-08	0.849215
iDnase	H1 Derived Neuronal Progenitor Cultured Cells	Stem-cells	Autism	-	0.0687162	0.0772116	1.10222	1.23849	0.933337	-3.52e-08	4.6e-08	0.777752
iDnase	H9 Derived Neuronal Progenitor Cultured Cells	Stem-cells	Autism	-	0.200244	0.0723121	2.67507	0.966019	0.102305	4.05e-08	3.98e-08	0.154114
iDnase	H9 Derived Neuron Cultured Cells	Stem-cells	Autism	-	0.285536	0.0761963	3.57136	0.953029	0.0151218	7.64e-08	3.89e-08	0.0248913
iDnase	Adipose Nuclei	Adipose	Autism	-	0.0428125	0.0725827	0.422419	0.716154	0.40793	-7.18e-08	3.03e-08	0.99113
iDnase	Fetal Adrenal Gland	Adrenal	Autism	-	0.102922	0.0661591	1.14183	0.733978	0.847252	-3.29e-08	2.89e-08	0.872512
iDnase	Osteoblast Primary Cells	Bone	Autism	-	0.0902147	0.0717223	0.822165	0.653635	0.783843	-3.27e-08	2.52e-08	0.902356
iDnase	Colonic Mucosa	Digestive	Autism	-	0.0142252	0.0744649	0.194419	1.01773	0.414058	-8.33e-08	4.07e-08	0.979698
iDnase	Duodenum Mucosa	Digestive	Autism	-	0.0760747	0.0726355	1.00974	0.964095	0.991852	-3.66e-08	3.69e-08	0.839324
iDnase	Esophagus	Digestive	Autism	-	0.0457027	0.068242	0.656441	0.98018	0.721028	-5.32e-08	3.56e-08	0.932426
iDnase	Fetal Intestine Large	Digestive	Autism	-	0.0331594	0.06085	0.467536	0.857965	0.52463	-6.43e-08	3.15e-08	0.979573
iDnase	Fetal Intestine Small	Digestive	Autism	-	0.0678123	0.0657245	0.818341	0.793146	0.816574	-4.62e-08	2.88e-08	0.945461
iDnase	Fetal Stomach	Digestive	Autism	-	0.0885423	0.0682014	0.971975	0.748682	0.970063	-4.52e-08	2.97e-08	0.935994
iDnase	Gastric	Digestive	Autism	-	0.0260013	0.0774869	0.382595	1.14018	0.574991	-6.82e-08	4.23e-08	0.946283
iDnase	Rectal Mucosa 1	Digestive	Autism	-	0.0318912	0.071891	0.435643	0.982052	0.55562	-7.18e-08	3.96e-08	0.965187
iDnase	Rectal Mucosa 2	Digestive	Autism	-	0.0356924	0.0662074	0.492082	0.912786	0.568339	-6.35e-08	3.4e-08	0.968908
iDnase	Sigmoid Colon	Digestive	Autism	-	0.0308384	0.069732	0.436678	0.98742	0.557638	-6.81e-08	3.74e-08	0.965712
iDnase	Small Intestine	Digestive	Autism	-	0.0197716	0.0730614	0.269982	0.997659	0.453014	-8.16e-08	4.18e-08	0.974567
iDnase	Stomach Mucosa	Digestive	Autism	-	0.0300003	0.0729583	0.384866	0.935961	0.493991	-7.21e-08	3.32e-08	0.985135
iDnase	Breast Myoepithelial Primary Cells	Epithelial	Autism	-	0.0304413	0.0871232	0.277754	0.794933	0.344225	-6.26e-08	2.94e-08	0.983305
iDnase	Breast variant Human Mammary Epithelial Cells (vHMEC)	Epithelial	Autism	-	0.0608999	0.0868497	0.538351	0.767745	0.535758	-4.35e-08	2.83e-08	0.938248
iDnase	Foreskin Fibroblast Primary Cells skin 1	Epithelial	Autism	-	0.108901	0.0730044	0.975499	0.653949	0.969929	-2.82e-08	2.47e-08	0.873794
iDnase	Foreskin Fibroblast Primary Cells skin 2	Epithelial	Autism	-	0.11729	0.0707352	1.16542	0.70284	0.814374	-1.99e-08	2.65e-08	0.773709
iDnase	Foreskin Keratinocyte Primary Cells skin 1	Epithelial	Autism	-	0.0713701	0.0768786	0.765153	0.824209	0.771828	-3.74e-08	2.97e-08	0.896199
iDnase	Foreskin Keratinocyte Primary Cells skin 2	Epithelial	Autism	-	0.0635896	0.0824888	0.57284	0.743092	0.554101	-4.28e-08	2.65e-08	0.947128
iDnase	Foreskin Melanocyte Primary Cells skin 1	Epithelial	Autism	-	0.13144	0.0717103	1.6034	0.874775	0.496562	-9.95e-10	3.23e-08	0.512267
iDnase	Foreskin Melanocyte Primary Cells skin 2	Epithelial	Autism	-	0.110988	0.0824194	0.922174	0.684805	0.908679	-3.33e-08	2.58e-08	0.902277
iDnase	HeLa-S3 Cervical Carcinoma Cell Line	Epithelial	Autism	-	0.0610299	0.0718201	0.641064	0.754405	0.627863	-4.35e-08	2.85e-08	0.936594
iDnase	HMEC Mammary Epithelial Primary Cells	Epithelial	Autism	-	0.0448887	0.076892	0.475765	0.814961	0.507864	-4.66e-08	2.88e-08	0.947299
iDnase	NHDF-Ad Adult Dermal Fibroblast Primary Cells	Epithelial	Autism	-	0.057204	0.0708617	0.646765	0.801183	0.654985	-4.15e-08	2.87e-08	0.926476
iDnase	NHEK-Epidermal Keratinocyte Primary Cells	Epithelial	Autism	-	0.0555473	0.0817708	0.501664	0.738497	0.485971	-4.54e-08	2.67e-08	0.95564
iDnase	Aorta	Heart	Autism	-	-0.0499535	0.0729416	-0.705088	1.02956	0.080078	-1.16e-07	3.71e-08	0.999152
iDnase	Fetal Heart	Heart	Autism	-	0.0216205	0.0758576	0.203199	0.712943	0.240012	-8.66e-08	2.83e-08	0.998896
iDnase	Left Ventricle	Heart	Autism	-	0.0391346	0.0661932	0.496388	0.839603	0.537484	-6.71e-08	3.43e-08	0.974852
iDnase	Right Atrium	Heart	Autism	-	0.0240613	0.0673751	0.338408	0.947591	0.472446	-7.56e-08	3.73e-08	0.978608
iDnase	Right Ventricle	Heart	Autism	-	0.0677867	0.0772619	0.724779	0.826089	0.73348	-5.17e-08	3.32e-08	0.940264
iDnase	Dnd41 TCell Leukemia Cell Line	Immune	Autism	-	0.171763	0.058072	2.32553	0.786248	0.104327	4.34e-08	3.19e-08	0.0867855
iDnase	Fetal Thymus	Immune	Autism	-	0.143807	0.0532711	2.10495	0.779748	0.172153	2.87e-08	3.31e-08	0.193358
iDnase	GM12878 Lymphoblastoid Cells	Immune	Autism	-	0.105798	0.065574	1.63056	1.01063	0.535299	5.07e-09	4.1e-08	0.45076
iDnase	K562 Leukemia Cells	Immune	Autism	-	0.0546444	0.0728369	0.658354	0.877538	0.689808	-5.15e-08	3.6e-08	0.923607
iDnase	Monocytes-CD14+ RO01746 Primary Cells	Immune	Autism	-	0.209367	0.0542429	2.48147	0.642903	0.0271676	5.57e-08	2.65e-08	0.0177156
iDnase	Primary B cells from cord blood	Immune	Autism	-	0.159002	0.049931	2.74361	0.861566	0.0559343	6.47e-08	3.67e-08	0.0390937
iDnase	Primary B cells from peripheral blood	Immune	Autism	-	0.151906	0.0497916	2.42145	0.793702	0.090054	5.1e-08	3.18e-08	0.0543873
iDnase	Primary hematopoietic stem cells	Immune	Autism	-	0.143864	0.0581781	2.63943	1.06737	0.139109	4.7e-08	4.28e-08	0.136087
iDnase	Primary hematopoietic stem cells G-CSF-mobilized Female	Immune	Autism	-	0.13966	0.0661974	1.83967	0.871984	0.344087	1.23e-08	3.69e-08	0.369477
iDnase	Primary hematopoietic stem cells G-CSF-mobilized Male	Immune	Autism	-	0.167097	0.0625498	2.01228	0.75326	0.190579	2.16e-08	3.2e-08	0.249895
iDnase	Primary hematopoietic stem cells short term culture	Immune	Autism	-	0.156701	0.0621791	2.307	0.915416	0.167031	3.43e-08	3.83e-08	0.185475
iDnase	Primary monocytes from peripheral blood	Immune	Autism	-	0.199566	0.0518378	3.00827	0.781405	0.0151071	7.98e-08	3.21e-08	0.00644808
iDnase	Primary mononuclear cells from peripheral blood	Immune	Autism	-	0.10177	0.0724948	1.27593	0.908892	0.762021	-2e-08	3.75e-08	0.703228
iDnase	Primary Natural Killer cells from peripheral blood	Immune	Autism	-	0.131493	0.0473536	2.12511	0.765303	0.159371	3.38e-08	3.26e-08	0.15005
iDnase	Primary neutrophils from peripheral blood	Immune	Autism	-	0.182969	0.049309	2.75584	0.74268	0.0216152	6.46e-08	2.97e-08	0.0149114
iDnase	Primary T CD8+ memory cells from peripheral blood	Immune	Autism	-	0.0971893	0.0475362	1.70101	0.831982	0.407056	8.88e-09	3.46e-08	0.398881
iDnase	Primary T CD8+ naive cells from peripheral blood	Immune	Autism	-	0.0989501	0.0454671	1.75617	0.806951	0.357617	1.02e-08	3.46e-08	0.384495
iDnase	Primary T cells effector/memory enriched from peripheral blood	Immune	Autism	-	0.108788	0.0455363	2.06624	0.864879	0.229728	2.73e-08	3.67e-08	0.228862
iDnase	Primary T cells from cord blood	Immune	Autism	-	0.136859	0.0498	2.77473	1.00967	0.0897036	5.59e-08	4.12e-08	0.0872749
iDnase	Primary T cells from peripheral blood	Immune	Autism	-	0.122737	0.0466142	2.01918	0.766867	0.197366	2.48e-08	3.33e-08	0.228313
iDnase	Primary T helper 17 cells PMA-I stimulated	Immune	Autism	-	0.149746	0.0524789	2.39924	0.840819	0.109677	4.72e-08	3.61e-08	0.0953584
iDnase	Primary T helper cells from peripheral blood	Immune	Autism	-	0.139298	0.0473617	2.25703	0.767396	0.114033	3.95e-08	3.24e-08	0.110947
iDnase	Primary T helper cells PMA-I stimulated	Immune	Autism	-	0.147251	0.0461987	2.13862	0.670973	0.103087	3.74e-08	2.85e-08	0.094615
iDnase	Primary T helper memory cells from peripheral blood 1	Immune	Autism	-	0.123612	0.0462663	2.21089	0.827504	0.156626	3.68e-08	3.45e-08	0.143087
iDnase	Primary T helper memory cells from peripheral blood 2	Immune	Autism	-	0.128822	0.050671	2.02369	0.795999	0.212588	2.88e-08	3.39e-08	0.197779
iDnase	Primary T helper naive cells from peripheral blood 1	Immune	Autism	-	0.125602	0.0506637	2.15344	0.868624	0.197393	3.23e-08	3.73e-08	0.193178
iDnase	Primary T helper naive cells from peripheral blood 2	Immune	Autism	-	0.119757	0.0444973	1.99557	0.74148	0.193266	2.5e-08	3.09e-08	0.209569
iDnase	Primary T regulatory cells from peripheral blood	Immune	Autism	-	0.130518	0.0462986	2.23691	0.793497	0.131719	3.94e-08	3.44e-08	0.126046
iDnase	Spleen	Immune	Autism	-	0.107971	0.0669985	1.53156	0.950368	0.581004	-1.03e-08	4.06e-08	0.600493
iDnase	Thymus	Immune	Autism	-	0.133272	0.0541919	2.35782	0.95875	0.168121	3.73e-08	4.2e-08	0.187404
iDnase	Adipose Derived Mesenchymal Stem Cell Cultured Cells	Mesench	Autism	-	0.0999687	0.0735408	0.757654	0.557359	0.659247	-4.04e-08	2.23e-08	0.964827
iDnase	Bone Marrow Derived Cultured Mesenchymal Stem Cells	Mesench	Autism	-	0.0873239	0.0737193	0.776569	0.655584	0.730938	-3.48e-08	2.49e-08	0.919024
iDnase	Mesenchymal Stem Cell Derived Adipocyte Cultured Cells	Mesench	Autism	-	0.0694149	0.0768456	0.546192	0.604661	0.444374	-5.19e-08	2.47e-08	0.982107
iDnase	Mesenchymal Stem Cell Derived Chondrocyte Cultured Cells	Mesench	Autism	-	0.0727019	0.0774934	0.605615	0.645529	0.535895	-4.69e-08	2.62e-08	0.963318
iDnase	Fetal Muscle Leg	Muscle	Autism	-	0.0952373	0.0675716	1.13495	0.805259	0.867217	-3.41e-08	3.32e-08	0.848241
iDnase	Fetal Muscle Trunk	Muscle	Autism	-	0.0572599	0.0654087	0.725744	0.829026	0.737688	-5.68e-08	3.29e-08	0.957789
iDnase	HSMM cell derived Skeletal Muscle Myotubes Cells	Muscle	Autism	-	0.123649	0.0777338	1.10541	0.694931	0.879562	-1.94e-08	2.68e-08	0.765194
iDnase	HSMM Skeletal Muscle Myoblasts Cells	Muscle	Autism	-	0.0955562	0.0782466	0.953086	0.780438	0.951812	-2.64e-08	2.86e-08	0.821947
iDnase	Muscle Satellite Cultured Cells	Muscle	Autism	-	0.119544	0.074969	1.02905	0.645346	0.96405	-2.31e-08	2.49e-08	0.823311
iDnase	Psoas Muscle	Muscle	Autism	-	0.0373824	0.0757819	0.42232	0.856131	0.487588	-6.44e-08	3.27e-08	0.975618
iDnase	Skeletal Muscle Female	Muscle	Autism	-	0.117899	0.0670635	1.16924	0.665086	0.799848	-2.61e-08	2.99e-08	0.808777
iDnase	Skeletal Muscle Male	Muscle	Autism	-	0.0929836	0.0617024	1.11174	0.737732	0.879811	-3.46e-08	3.22e-08	0.859205
iDnase	A549 EtOH 0.02pct Lung Carcinoma Cell Line	Other	Autism	-	0.0851388	0.0718505	0.73975	0.624291	0.669727	-4.1e-08	2.41e-08	0.955805
iDnase	Fetal Kidney	Other	Autism	-	0.0443369	0.0811955	0.549666	1.00662	0.646733	-6.4e-08	3.49e-08	0.966647
iDnase	Fetal Lung	Other	Autism	-	0.0940793	0.0741758	1.05094	0.828605	0.950568	-4.27e-08	3.18e-08	0.910491
iDnase	HepG2 Hepatocellular Carcinoma Cell Line	Other	Autism	-	-0.00891509	0.0780824	-0.0903201	0.791064	0.140026	-9.21e-08	3.04e-08	0.998794
iDnase	HUVEC Umbilical Vein Endothelial Primary Cells	Other	Autism	-	0.0870229	0.0738627	0.863278	0.732727	0.850696	-3.58e-08	2.87e-08	0.894015
iDnase	Liver	Other	Autism	-	0.094133	0.0662191	1.08058	0.760152	0.91506	-3.22e-08	2.98e-08	0.860243
iDnase	Lung	Other	Autism	-	0.0743625	0.0715097	1.04628	1.00614	0.963007	-3.69e-08	4.06e-08	0.818689
iDnase	NHLF Lung Fibroblast Primary Cells	Other	Autism	-	0.0514698	0.0693631	0.574897	0.774758	0.57748	-4.73e-08	2.79e-08	0.954767
iDnase	Ovary	Other	Autism	-	0.0677241	0.0731989	0.89524	0.967611	0.912761	-4.2e-08	3.7e-08	0.871899
iDnase	Pancreas	Other	Autism	-	0.0568719	0.0714425	0.929355	1.16746	0.951012	-4.11e-08	4.1e-08	0.841863
iDnase	Pancreatic Islets	Other	Autism	-	0.054694	0.0697895	0.950649	1.21303	0.967414	-4.17e-08	4.6e-08	0.817313
iDnase	Placenta	Other	Autism	-	0.0254018	0.069024	0.32382	0.879911	0.419932	-7.64e-08	3.17e-08	0.992026
iDnase	Placenta Amnion	Other	Autism	-	0.000906744	0.0801279	0.00919273	0.812351	0.193191	-7.82e-08	2.74e-08	0.997855
iDnase	Colon Smooth Muscle	Sm. Muscle	Autism	-	0.0919237	0.0687261	1.02394	0.765541	0.974941	-4.07e-08	3.06e-08	0.908086
iDnase	Duodenum Smooth Muscle	Sm. Muscle	Autism	-	0.0691832	0.0784141	0.706665	0.800954	0.709897	-5.43e-08	3.35e-08	0.947577
iDnase	Rectal Smooth Muscle	Sm. Muscle	Autism	-	0.0685998	0.0645362	0.925639	0.870807	0.931602	-4.47e-08	3.47e-08	0.901157
iDnase	Stomach Smooth Muscle	Sm. Muscle	Autism	-	0.0782536	0.0649721	0.985967	0.818625	0.986279	-4.29e-08	3.15e-08	0.913113
iDnase	ES-I3 Cells	Stem-cells	Autism	-	0.136866	0.0924175	1.49678	1.01068	0.625169	-1.37e-08	3.99e-08	0.63421
iDnase	ES-UCSF4 Cells	Stem-cells	Autism	-	0.181444	0.0761554	2.66625	1.11907	0.157947	4.06e-08	4.93e-08	0.205208
iDnase	ES-WA7 Cells	Stem-cells	Autism	-	0.128426	0.0828372	1.99417	1.28628	0.449391	1.35e-08	4.84e-08	0.389929
iDnase	H1 BMP4 Derived Mesendoderm Cultured Cells	Stem-cells	Autism	-	0.103252	0.0844666	1.52346	1.24629	0.673715	-1.27e-08	4.56e-08	0.609278
iDnase	H1 BMP4 Derived Trophoblast Cultured Cells	Stem-cells	Autism	-	-0.0421892	0.0869824	-0.48158	0.992884	0.0959616	-1.08e-07	3.23e-08	0.999558
iDnase	H1 Cells	Stem-cells	Autism	-	0.167441	0.0735438	2.57869	1.13261	0.183454	3.61e-08	4.71e-08	0.221743
iDnase	H1 Derived Mesenchymal Stem Cells	Stem-cells	Autism	-	0.0665658	0.0731009	0.76591	0.841104	0.77719	-4.05e-08	3.04e-08	0.909105
iDnase	H9 Cells	Stem-cells	Autism	-	0.109801	0.0765298	1.90473	1.32757	0.501125	2.96e-09	5.15e-08	0.477062
iDnase	hESC Derived CD184+ Endoderm Cultured Cells	Stem-cells	Autism	-	0.15565	0.0940142	1.50967	0.911852	0.579332	-1.51e-08	3.61e-08	0.661805
iDnase	hESC Derived CD56+ Ectoderm Cultured Cells	Stem-cells	Autism	-	0.184265	0.0711061	2.78552	1.07491	0.117362	4.01e-08	4.42e-08	0.182024
iDnase	hESC Derived CD56+ Mesoderm Cultured Cells	Stem-cells	Autism	-	0.0944926	0.0858497	0.909753	0.826542	0.910918	-3.66e-08	3.01e-08	0.887956
iDnase	HUES48 Cells	Stem-cells	Autism	-	0.197895	0.0886542	2.5492	1.14201	0.193556	3.37e-08	4.67e-08	0.235133
iDnase	HUES64 Cells	Stem-cells	Autism	-	0.136914	0.0893652	1.75435	1.14508	0.515904	-5.33e-09	4.51e-08	0.547015
iDnase	HUES6 Cells	Stem-cells	Autism	-	0.139077	0.088426	1.73995	1.10627	0.509571	-3.81e-09	4.42e-08	0.534299
iDnase	IMR90 fetal lung fibroblasts Cell Line	Stem-cells	Autism	-	0.102292	0.0738717	0.957079	0.691167	0.950154	-2.93e-08	2.63e-08	0.867191
iDnase	iPS-15b Cells	Stem-cells	Autism	-	0.174165	0.0791982	2.45134	1.1147	0.213068	2.87e-08	4.56e-08	0.264747
iDnase	iPS-18 Cells	Stem-cells	Autism	-	0.188775	0.0825442	2.49782	1.0922	0.19126	3.14e-08	4.65e-08	0.24968
iDnase	iPS-20b Cells	Stem-cells	Autism	-	0.18585	0.0816474	2.53294	1.11277	0.189578	3.43e-08	4.66e-08	0.230766
iDnase	iPS DF 19.11 Cells	Stem-cells	Autism	-	0.0843055	0.0767335	1.25281	1.14029	0.824075	-2.6e-08	4.44e-08	0.721421
iDnase	iPS DF 6.9 Cells	Stem-cells	Autism	-	0.15112	0.0703142	2.81815	1.31125	0.186318	4.83e-08	5.3e-08	0.181026
iDnase	Brain Angular Gyrus	Brain	Education Years	28197077	0.336372	0.0327162	3.75076	0.364806	1.98e-12	5.08e-08	9.98e-09	1.81e-07
iDnase	Brain Anterior Caudate	Brain	Education Years	28197077	0.272499	0.0299382	2.95792	0.324973	7.11e-09	2.6e-08	8.94e-09	0.00179064
iDnase	Brain Cingulate Gyrus	Brain	Education Years	28197077	0.277165	0.0293804	3.02432	0.320589	2.04e-09	2.8e-08	8.71e-09	0.0006501
iDnase	Brain Dorsolateral Prefrontal Cortex	Brain	Education Years	28197077	0.274864	0.0285702	3.16842	0.329335	4.48e-10	3.3e-08	9.59e-09	0.000287252
iDnase	Brain Germinal Matrix	Brain	Education Years	28197077	0.342716	0.0322366	5.28489	0.497107	8.19e-15	8.22e-08	1.22e-08	6.73e-12
iDnase	Brain Hippocampus Middle	Brain	Education Years	28197077	0.282035	0.0305647	2.74992	0.298014	1.38e-08	2.29e-08	8.52e-09	0.00356815
iDnase	Brain Inferior Temporal Lobe	Brain	Education Years	28197077	0.299053	0.0293475	3.32546	0.326344	2.19e-11	3.83e-08	9.1e-09	1.29e-05
iDnase	Brain Substantia Nigra	Brain	Education Years	28197077	0.222893	0.0303623	2.45152	0.333945	2.09e-05	8.71e-09	9.13e-09	0.169947
iDnase	Fetal Brain Female	Brain	Education Years	28197077	0.369223	0.035765	3.8121	0.369262	1.03e-12	5.08e-08	9.26e-09	2.14e-08
iDnase	Fetal Brain Male	Brain	Education Years	28197077	0.324821	0.031297	3.96275	0.381817	9.47e-13	5.35e-08	9.96e-09	3.89e-08
iDnase	Cortex derived primary cultured neurospheres	Brain	Education Years	28197077	0.34974	0.0347046	4.44756	0.441329	6.61e-13	6.45e-08	1.12e-08	3.78e-09
iDnase	Ganglion Eminence derived primary cultured neurospheres	Brain	Education Years	28197077	0.34853	0.035445	4.4526	0.452823	1.67e-12	6.4e-08	1.14e-08	9.13e-09
iDnase	NH-A Astrocytes Primary Cells	Brain	Education Years	28197077	0.14513	0.0313784	1.30408	0.281955	0.280339	-1.4e-08	7.21e-09	0.973843
iDnase	H1 Derived Neuronal Progenitor Cultured Cells	Stem-cells	Education Years	28197077	0.149153	0.0264586	2.39245	0.424402	0.00125665	5.19e-09	1.03e-08	0.307016
iDnase	H9 Derived Neuronal Progenitor Cultured Cells	Stem-cells	Education Years	28197077	0.21515	0.029769	2.8742	0.397684	5.12e-06	1.97e-08	1.02e-08	0.0260419
iDnase	H9 Derived Neuron Cultured Cells	Stem-cells	Education Years	28197077	0.321179	0.0330804	4.01716	0.413755	9.59e-12	5.3e-08	1.05e-08	2.22e-07
iDnase	Adipose Nuclei	Adipose	Education Years	28197077	0.16646	0.0274045	1.64242	0.270392	0.018644	-1.41e-08	7.51e-09	0.970087
iDnase	Fetal Adrenal Gland	Adrenal	Education Years	28197077	0.156998	0.0270797	1.74176	0.300426	0.0147977	-1.27e-08	7.87e-09	0.94617
iDnase	Osteoblast Primary Cells	Bone	Education Years	28197077	0.138691	0.0292602	1.26395	0.266661	0.322525	-1.51e-08	6.84e-09	0.98629
iDnase	Colonic Mucosa	Digestive	Education Years	28197077	0.107529	0.0255424	1.46963	0.349095	0.180458	-2.57e-08	9.91e-09	0.99531
iDnase	Duodenum Mucosa	Digestive	Education Years	28197077	0.124723	0.0244341	1.65546	0.324315	0.0440839	-1.61e-08	8.91e-09	0.964532
iDnase	Esophagus	Digestive	Education Years	28197077	0.112866	0.0230776	1.62114	0.331471	0.062624	-1.66e-08	9.03e-09	0.966576
iDnase	Fetal Intestine Large	Digestive	Education Years	28197077	0.102866	0.0222547	1.45037	0.313783	0.151934	-2.24e-08	7.82e-09	0.997923
iDnase	Fetal Intestine Small	Digestive	Education Years	28197077	0.123599	0.0246005	1.49157	0.296873	0.0986501	-1.97e-08	7.69e-09	0.994755
iDnase	Fetal Stomach	Digestive	Education Years	28197077	0.135984	0.0259913	1.49276	0.28532	0.0866746	-2.4e-08	7.51e-09	0.9993
iDnase	Gastric	Digestive	Education Years	28197077	0.106709	0.0240513	1.57016	0.353901	0.107737	-1.96e-08	9.4e-09	0.98165
iDnase	Rectal Mucosa 1	Digestive	Education Years	28197077	0.110903	0.023119	1.51497	0.315812	0.104075	-2.37e-08	8.96e-09	0.995967
iDnase	Rectal Mucosa 2	Digestive	Education Years	28197077	0.10432	0.0231759	1.43824	0.31952	0.171233	-2.38e-08	8.75e-09	0.996766
iDnase	Sigmoid Colon	Digestive	Education Years	28197077	0.103363	0.022197	1.46365	0.314314	0.140338	-2.4e-08	8.48e-09	0.997671
iDnase	Small Intestine	Digestive	Education Years	28197077	0.10779	0.025294	1.47188	0.345392	0.174161	-2.5e-08	9.73e-09	0.994873
iDnase	Stomach Mucosa	Digestive	Education Years	28197077	0.121302	0.0244437	1.55615	0.313581	0.0773313	-1.88e-08	8.36e-09	0.987561
iDnase	Breast Myoepithelial Primary Cells	Epithelial	Education Years	28197077	0.154922	0.0315805	1.41354	0.288148	0.150353	-1.17e-08	7.29e-09	0.946314
iDnase	Breast variant Human Mammary Epithelial Cells (vHMEC)	Epithelial	Education Years	28197077	0.12356	0.0291861	1.09226	0.258003	0.720095	-1.66e-08	6.62e-09	0.993914
iDnase	Foreskin Fibroblast Primary Cells skin 1	Epithelial	Education Years	28197077	0.148361	0.0297185	1.32897	0.266208	0.216175	-1.48e-08	6.79e-09	0.985411
iDnase	Foreskin Fibroblast Primary Cells skin 2	Epithelial	Education Years	28197077	0.134673	0.0285904	1.33814	0.28408	0.233611	-1.66e-08	7.34e-09	0.988053
iDnase	Foreskin Keratinocyte Primary Cells skin 1	Epithelial	Education Years	28197077	0.104764	0.0270545	1.12317	0.290049	0.670481	-2.08e-08	7.38e-09	0.997562
iDnase	Foreskin Keratinocyte Primary Cells skin 2	Epithelial	Education Years	28197077	0.145762	0.0281147	1.31309	0.253268	0.213976	-1.03e-08	6.49e-09	0.942936
iDnase	Foreskin Melanocyte Primary Cells skin 1	Epithelial	Education Years	28197077	0.108815	0.0284405	1.32741	0.346938	0.345254	-1.96e-08	8.49e-09	0.9896
iDnase	Foreskin Melanocyte Primary Cells skin 2	Epithelial	Education Years	28197077	0.165256	0.0348395	1.37308	0.289474	0.196438	-1.22e-08	7.28e-09	0.953315
iDnase	HeLa-S3 Cervical Carcinoma Cell Line	Epithelial	Education Years	28197077	0.124798	0.0261665	1.31089	0.274856	0.257224	-1.39e-08	6.96e-09	0.977201
iDnase	HMEC Mammary Epithelial Primary Cells	Epithelial	Education Years	28197077	0.102585	0.0258306	1.08727	0.273772	0.749383	-1.82e-08	6.93e-09	0.995609
iDnase	NHDF-Ad Adult Dermal Fibroblast Primary Cells	Epithelial	Education Years	28197077	0.115647	0.0276066	1.30753	0.312128	0.324063	-1.56e-08	7.52e-09	0.981072
iDnase	NHEK-Epidermal Keratinocyte Primary Cells	Epithelial	Education Years	28197077	0.121017	0.028062	1.09294	0.253436	0.713236	-1.63e-08	6.57e-09	0.993364
iDnase	Aorta	Heart	Education Years	28197077	0.0984357	0.0251108	1.38941	0.354435	0.272836	-2.27e-08	9.05e-09	0.993922
iDnase	Fetal Heart	Heart	Education Years	28197077	0.151528	0.0315816	1.42413	0.296817	0.154136	-2.2e-08	8.06e-09	0.996808
iDnase	Left Ventricle	Heart	Education Years	28197077	0.140805	0.0251948	1.78599	0.319574	0.015236	-1.31e-08	9.06e-09	0.925637
iDnase	Right Atrium	Heart	Education Years	28197077	0.132555	0.0257639	1.86431	0.362354	0.0186399	-1.28e-08	1.03e-08	0.893299
iDnase	Right Ventricle	Heart	Education Years	28197077	0.131948	0.0306295	1.41079	0.327493	0.210126	-2.13e-08	9.12e-09	0.990161
iDnase	Dnd41 TCell Leukemia Cell Line	Immune	Education Years	28197077	0.157983	0.0219364	2.13897	0.297002	0.000158581	5.7e-09	7.83e-09	0.233019
iDnase	Fetal Thymus	Immune	Education Years	28197077	0.153299	0.0221467	2.24389	0.324169	0.000190896	5.96e-09	9.5e-09	0.265432
iDnase	GM12878 Lymphoblastoid Cells	Immune	Education Years	28197077	0.146243	0.0230693	2.2539	0.355545	0.000521753	8.46e-09	1.08e-08	0.217605
iDnase	K562 Leukemia Cells	Immune	Education Years	28197077	0.157291	0.02554	1.89504	0.307706	0.0038855	-2.52e-10	8.86e-09	0.511329
iDnase	Monocytes-CD14+ RO01746 Primary Cells	Immune	Education Years	28197077	0.180982	0.022924	2.14506	0.271702	3.89e-05	1.16e-08	6.78e-09	0.0430051
iDnase	Primary B cells from cord blood	Immune	Education Years	28197077	0.15394	0.0213301	2.65626	0.368054	1.18e-05	2.03e-08	9.93e-09	0.0205434
iDnase	Primary B cells from peripheral blood	Immune	Education Years	28197077	0.161815	0.0218378	2.57941	0.348106	1.08e-05	2.11e-08	9.92e-09	0.0167124
iDnase	Primary hematopoietic stem cells	Immune	Education Years	28197077	0.141518	0.0218853	2.59639	0.401523	0.00010279	1.38e-08	1.01e-08	0.0862588
iDnase	Primary hematopoietic stem cells G-CSF-mobilized Female	Immune	Education Years	28197077	0.180154	0.0236425	2.37308	0.31143	1.53e-05	1.28e-08	8.65e-09	0.0695992
iDnase	Primary hematopoietic stem cells G-CSF-mobilized Male	Immune	Education Years	28197077	0.193512	0.0232241	2.33038	0.279677	3.73e-06	1.41e-08	7.76e-09	0.0345484
iDnase	Primary hematopoietic stem cells short term culture	Immune	Education Years	28197077	0.163215	0.0234974	2.40288	0.345934	6.95e-05	1.19e-08	9.3e-09	0.100081
iDnase	Primary monocytes from peripheral blood	Immune	Education Years	28197077	0.154877	0.0221626	2.33462	0.334079	9.32e-05	1.32e-08	8.09e-09	0.0509313
iDnase	Primary mononuclear cells from peripheral blood	Immune	Education Years	28197077	0.159983	0.0268256	2.00576	0.336321	0.00286831	1.47e-10	8.78e-09	0.493315
iDnase	Primary Natural Killer cells from peripheral blood	Immune	Education Years	28197077	0.15176	0.020252	2.45266	0.327302	1.34e-05	1.59e-08	9.26e-09	0.0432202
iDnase	Primary neutrophils from peripheral blood	Immune	Education Years	28197077	0.151821	0.0218939	2.28669	0.32976	0.000129177	1.24e-08	7.81e-09	0.0557256
iDnase	Primary T CD8+ memory cells from peripheral blood	Immune	Education Years	28197077	0.1412	0.0209176	2.47128	0.366101	6.73e-05	1.36e-08	1.04e-08	0.0953369
iDnase	Primary T CD8+ naive cells from peripheral blood	Immune	Education Years	28197077	0.135034	0.0199501	2.39658	0.354074	8.64e-05	1.05e-08	9.89e-09	0.143932
iDnase	Primary T cells effector/memory enriched from peripheral blood	Immune	Education Years	28197077	0.12661	0.0204552	2.40474	0.388509	0.000325745	9.31e-09	1.06e-08	0.189865
iDnase	Primary T cells from cord blood	Immune	Education Years	28197077	0.14071	0.0212377	2.85281	0.430582	2.27e-05	2.06e-08	1.09e-08	0.0296094
iDnase	Primary T cells from peripheral blood	Immune	Education Years	28197077	0.1421	0.0202581	2.33774	0.333273	6.98e-05	8.18e-09	9.15e-09	0.185462
iDnase	Primary T helper 17 cells PMA-I stimulated	Immune	Education Years	28197077	0.153171	0.0226894	2.45411	0.363531	8.17e-05	1.4e-08	9.79e-09	0.0763087
iDnase	Primary T helper cells from peripheral blood	Immune	Education Years	28197077	0.15505	0.0207826	2.51227	0.336739	9.58e-06	1.68e-08	9.33e-09	0.0360996
iDnase	Primary T helper cells PMA-I stimulated	Immune	Education Years	28197077	0.166028	0.0203831	2.41133	0.296036	2.79e-06	1.72e-08	8.22e-09	0.0181661
iDnase	Primary T helper memory cells from peripheral blood 1	Immune	Education Years	28197077	0.141045	0.0207714	2.52269	0.37151	4.82e-05	1.51e-08	1.02e-08	0.0692276
iDnase	Primary T helper memory cells from peripheral blood 2	Immune	Education Years	28197077	0.153328	0.0221753	2.40865	0.348356	6.49e-05	1.32e-08	9.98e-09	0.0925769
iDnase	Primary T helper naive cells from peripheral blood 1	Immune	Education Years	28197077	0.143087	0.0215953	2.45321	0.370249	9.59e-05	1.25e-08	1e-08	0.107189
iDnase	Primary T helper naive cells from peripheral blood 2	Immune	Education Years	28197077	0.142478	0.0196081	2.37418	0.326739	3.36e-05	1.09e-08	9.37e-09	0.122979
iDnase	Primary T regulatory cells from peripheral blood	Immune	Education Years	28197077	0.141357	0.0208845	2.42267	0.357933	8.85e-05	1.32e-08	9.8e-09	0.0888091
iDnase	Spleen	Immune	Education Years	28197077	0.123574	0.0223198	1.75289	0.316604	0.0190411	-1.59e-08	9.05e-09	0.96084
iDnase	Thymus	Immune	Education Years	28197077	0.139857	0.0212512	2.47431	0.375972	0.000123527	8.92e-09	1.05e-08	0.197297
iDnase	Adipose Derived Mesenchymal Stem Cell Cultured Cells	Mesench	Education Years	28197077	0.147814	0.0315464	1.12027	0.239087	0.615157	-2.06e-08	6.15e-09	0.999587
iDnase	Bone Marrow Derived Cultured Mesenchymal Stem Cells	Mesench	Education Years	28197077	0.117759	0.0296897	1.04723	0.26403	0.858136	-2.21e-08	6.8e-09	0.999408
iDnase	Mesenchymal Stem Cell Derived Adipocyte Cultured Cells	Mesench	Education Years	28197077	0.130802	0.0309588	1.02922	0.2436	0.904607	-2.46e-08	6.21e-09	0.999964
iDnase	Mesenchymal Stem Cell Derived Chondrocyte Cultured Cells	Mesench	Education Years	28197077	0.132513	0.0306632	1.10384	0.255428	0.684426	-2.22e-08	6.8e-09	0.999443
iDnase	Fetal Muscle Leg	Muscle	Education Years	28197077	0.145433	0.0250609	1.73315	0.298654	0.0154302	-1.54e-08	8.11e-09	0.971415
iDnase	Fetal Muscle Trunk	Muscle	Education Years	28197077	0.142461	0.0236186	1.80562	0.299356	0.00776651	-1.4e-08	8.02e-09	0.959866
iDnase	HSMM cell derived Skeletal Muscle Myotubes Cells	Muscle	Education Years	28197077	0.133412	0.0304624	1.19269	0.272331	0.478624	-1.83e-08	7.12e-09	0.9949
iDnase	HSMM Skeletal Muscle Myoblasts Cells	Muscle	Education Years	28197077	0.114192	0.0297063	1.13896	0.296293	0.638738	-2.01e-08	7.62e-09	0.995891
iDnase	Muscle Satellite Cultured Cells	Muscle	Education Years	28197077	0.153129	0.0303561	1.31816	0.261311	0.223361	-1.34e-08	6.82e-09	0.975439
iDnase	Psoas Muscle	Muscle	Education Years	28197077	0.134893	0.0286699	1.52393	0.323893	0.107161	-1.77e-08	9e-09	0.975169
iDnase	Skeletal Muscle Female	Muscle	Education Years	28197077	0.156082	0.0275088	1.5479	0.272812	0.0459938	-1.74e-08	7.73e-09	0.987985
iDnase	Skeletal Muscle Male	Muscle	Education Years	28197077	0.157442	0.0255539	1.88242	0.305529	0.00449354	-1.06e-08	8.22e-09	0.900881
iDnase	A549 EtOH 0.02pct Lung Carcinoma Cell Line	Other	Education Years	28197077	0.1867	0.0277447	1.62219	0.241067	0.0102054	-1.76e-09	6.2e-09	0.611613
iDnase	Fetal Kidney	Other	Education Years	28197077	0.110106	0.0317395	1.36504	0.39349	0.35423	-2.58e-08	9.93e-09	0.995279
iDnase	Fetal Lung	Other	Education Years	28197077	0.164079	0.0314646	1.8329	0.351486	0.0190433	-1.27e-08	9.4e-09	0.911622
iDnase	HepG2 Hepatocellular Carcinoma Cell Line	Other	Education Years	28197077	0.0942717	0.0293684	0.955081	0.297535	0.880148	-3.22e-08	8.7e-09	0.999893
iDnase	HUVEC Umbilical Vein Endothelial Primary Cells	Other	Education Years	28197077	0.124388	0.0273411	1.23395	0.271227	0.388251	-1.83e-08	7.05e-09	0.995219
iDnase	Liver	Other	Education Years	28197077	0.148832	0.0254112	1.70849	0.291704	0.0157871	-1.24e-08	8.06e-09	0.937465
iDnase	Lung	Other	Education Years	28197077	0.113854	0.0235382	1.60191	0.331182	0.0708531	-2.05e-08	9.38e-09	0.985659
iDnase	NHLF Lung Fibroblast Primary Cells	Other	Education Years	28197077	0.105458	0.0294598	1.17792	0.329054	0.588681	-2.1e-08	8.03e-09	0.995562
iDnase	Ovary	Other	Education Years	28197077	0.122851	0.0288374	1.62395	0.381199	0.104187	-1.74e-08	9.96e-09	0.960053
iDnase	Pancreas	Other	Education Years	28197077	0.0983675	0.0234401	1.60744	0.383039	0.113384	-1.95e-08	9.77e-09	0.977256
iDnase	Pancreatic Islets	Other	Education Years	28197077	0.13406	0.0283025	2.33013	0.491932	0.00745744	3.88e-11	1.26e-08	0.498768
iDnase	Placenta	Other	Education Years	28197077	0.135214	0.0249909	1.7237	0.318582	0.0247797	-1.34e-08	9.29e-09	0.926142
iDnase	Placenta Amnion	Other	Education Years	28197077	0.114949	0.0282119	1.16538	0.286017	0.563277	-2.1e-08	7.46e-09	0.997582
iDnase	Colon Smooth Muscle	Sm. Muscle	Education Years	28197077	0.14835	0.0271578	1.65247	0.302511	0.0330517	-1.79e-08	8.29e-09	0.984605
iDnase	Duodenum Smooth Muscle	Sm. Muscle	Education Years	28197077	0.145398	0.0301294	1.48515	0.307755	0.116154	-2.03e-08	8.59e-09	0.990872
iDnase	Rectal Smooth Muscle	Sm. Muscle	Education Years	28197077	0.123646	0.0253331	1.6684	0.341828	0.0526083	-1.98e-08	9.09e-09	0.985301
iDnase	Stomach Smooth Muscle	Sm. Muscle	Education Years	28197077	0.141195	0.0253072	1.77901	0.318861	0.0159267	-1.55e-08	8.36e-09	0.96837
iDnase	ES-I3 Cells	Stem-cells	Education Years	28197077	0.192846	0.031231	2.10898	0.341545	0.00139958	3.06e-09	9.3e-09	0.371136
iDnase	ES-UCSF4 Cells	Stem-cells	Education Years	28197077	0.210423	0.0247043	3.09208	0.36302	4.71e-08	2.97e-08	9.35e-09	0.000733381
iDnase	ES-WA7 Cells	Stem-cells	Education Years	28197077	0.148744	0.0256818	2.30966	0.398781	0.00116951	5.57e-09	1e-08	0.289356
iDnase	H1 BMP4 Derived Mesendoderm Cultured Cells	Stem-cells	Education Years	28197077	0.157156	0.026751	2.31881	0.394706	0.00101327	5.52e-09	9.75e-09	0.285702
iDnase	H1 BMP4 Derived Trophoblast Cultured Cells	Stem-cells	Education Years	28197077	0.128529	0.0259788	1.46713	0.296543	0.117416	-1.59e-08	8.11e-09	0.975301
iDnase	H1 Cells	Stem-cells	Education Years	28197077	0.181028	0.0250465	2.78792	0.38573	6.78e-06	1.95e-08	9.8e-09	0.0232354
iDnase	H1 Derived Mesenchymal Stem Cells	Stem-cells	Education Years	28197077	0.101012	0.0279229	1.16225	0.321283	0.613825	-2.39e-08	8.19e-09	0.998207
iDnase	H9 Cells	Stem-cells	Education Years	28197077	0.169424	0.0253784	2.93901	0.44024	1.79e-05	2.17e-08	1.09e-08	0.0231631
iDnase	hESC Derived CD184+ Endoderm Cultured Cells	Stem-cells	Education Years	28197077	0.231305	0.0335668	2.24344	0.325567	0.000196824	6.84e-09	8.71e-09	0.216213
iDnase	hESC Derived CD56+ Ectoderm Cultured Cells	Stem-cells	Education Years	28197077	0.196593	0.0281673	2.97189	0.425804	7.25e-06	1.99e-08	1.07e-08	0.0316609
iDnase	hESC Derived CD56+ Mesoderm Cultured Cells	Stem-cells	Education Years	28197077	0.160034	0.0320084	1.54077	0.30817	0.0799865	-1.15e-08	7.7e-09	0.932607
iDnase	HUES48 Cells	Stem-cells	Education Years	28197077	0.215951	0.0283637	2.78179	0.365369	2.64e-06	2.16e-08	9.38e-09	0.0107641
iDnase	HUES64 Cells	Stem-cells	Education Years	28197077	0.210665	0.0279219	2.69935	0.357776	4.24e-06	1.85e-08	9.34e-09	0.0238404
iDnase	HUES6 Cells	Stem-cells	Education Years	28197077	0.204803	0.0283332	2.56223	0.354467	2.03e-05	1.55e-08	9.44e-09	0.0499785
iDnase	IMR90 fetal lung fibroblasts Cell Line	Stem-cells	Education Years	28197077	0.13297	0.0290934	1.24411	0.272208	0.370259	-1.81e-08	6.86e-09	0.995813
iDnase	iPS-15b Cells	Stem-cells	Education Years	28197077	0.213172	0.0261877	3.00036	0.368588	2.11e-07	2.66e-08	9.23e-09	0.001945
iDnase	iPS-18 Cells	Stem-cells	Education Years	28197077	0.225849	0.0268837	2.98836	0.355717	8.55e-08	2.7e-08	9.13e-09	0.00154815
iDnase	iPS-20b Cells	Stem-cells	Education Years	28197077	0.220875	0.0275706	3.0103	0.375758	2.65e-07	2.77e-08	9.47e-09	0.00170426
iDnase	iPS DF 19.11 Cells	Stem-cells	Education Years	28197077	0.157867	0.0252652	2.34596	0.375449	0.000451727	5.35e-09	1.01e-08	0.29817
iDnase	iPS DF 6.9 Cells	Stem-cells	Education Years	28197077	0.158915	0.0244699	2.96352	0.456327	2.8e-05	2.23e-08	1.12e-08	0.02336
iDnase	Brain Angular Gyrus	Brain	Subjective Well Being	27089181	0.337065	0.0834075	3.75848	0.930045	0.00360084	9.98e-09	5.27e-09	0.0291845
iDnase	Brain Anterior Caudate	Brain	Subjective Well Being	27089181	0.256986	0.0791843	2.78953	0.859531	0.0394538	3.26e-09	5.06e-09	0.260046
iDnase	Brain Cingulate Gyrus	Brain	Subjective Well Being	27089181	0.27154	0.0773582	2.96294	0.844104	0.0216612	4.56e-09	4.9e-09	0.175911
iDnase	Brain Dorsolateral Prefrontal Cortex	Brain	Subjective Well Being	27089181	0.303442	0.0792167	3.49784	0.913149	0.00720832	8.67e-09	5.36e-09	0.0527902
iDnase	Brain Germinal Matrix	Brain	Subjective Well Being	27089181	0.319009	0.0744653	4.91931	1.1483	0.000838071	1.57e-08	5.79e-09	0.00341783
iDnase	Brain Hippocampus Middle	Brain	Subjective Well Being	27089181	0.283014	0.0785533	2.75946	0.765916	0.0236747	3.59e-09	4.7e-09	0.222682
iDnase	Brain Inferior Temporal Lobe	Brain	Subjective Well Being	27089181	0.279334	0.0768928	3.10618	0.855046	0.0149707	5.56e-09	4.9e-09	0.128385
iDnase	Brain Substantia Nigra	Brain	Subjective Well Being	27089181	0.242187	0.0798437	2.66373	0.878172	0.0598583	2.52e-09	5.08e-09	0.310163
iDnase	Fetal Brain Female	Brain	Subjective Well Being	27089181	0.372373	0.0923144	3.84463	0.953116	0.00370524	1.08e-08	5.04e-09	0.0162565
iDnase	Fetal Brain Male	Brain	Subjective Well Being	27089181	0.320462	0.0790633	3.90956	0.964555	0.00323842	1.11e-08	5.11e-09	0.0150919
iDnase	Cortex derived primary cultured neurospheres	Brain	Subjective Well Being	27089181	0.306712	0.0827627	3.90037	1.05247	0.00678136	9.93e-09	5.56e-09	0.0371975
iDnase	Ganglion Eminence derived primary cultured neurospheres	Brain	Subjective Well Being	27089181	0.31063	0.0853107	3.96842	1.08988	0.00647788	1.03e-08	5.52e-09	0.0305155
iDnase	NH-A Astrocytes Primary Cells	Brain	Subjective Well Being	27089181	0.226148	0.0820931	2.03208	0.737658	0.166579	4.15e-10	4.04e-09	0.459085
iDnase	H1 Derived Neuronal Progenitor Cultured Cells	Stem-cells	Subjective Well Being	27089181	0.187271	0.0734245	3.00387	1.17775	0.0870689	5.16e-09	6.44e-09	0.211343
iDnase	H9 Derived Neuronal Progenitor Cultured Cells	Stem-cells	Subjective Well Being	27089181	0.248714	0.0812566	3.32258	1.08551	0.0328917	7.16e-09	6.46e-09	0.133896
iDnase	H9 Derived Neuron Cultured Cells	Stem-cells	Subjective Well Being	27089181	0.237858	0.0813692	2.97502	1.01773	0.0517858	4.16e-09	5.53e-09	0.2259
iDnase	Adipose Nuclei	Adipose	Subjective Well Being	27089181	0.233618	0.0838256	2.30505	0.827085	0.118528	1.2e-09	4.82e-09	0.401408
iDnase	Fetal Adrenal Gland	Adrenal	Subjective Well Being	27089181	0.21478	0.0787249	2.3828	0.873384	0.117856	1.92e-09	5.21e-09	0.356601
iDnase	Osteoblast Primary Cells	Bone	Subjective Well Being	27089181	0.182145	0.0737833	1.65996	0.672418	0.328833	-1.93e-09	3.67e-09	0.701161
iDnase	Colonic Mucosa	Digestive	Subjective Well Being	27089181	0.167613	0.0690813	2.2908	0.944152	0.174878	5.9e-10	5.46e-09	0.456993
iDnase	Duodenum Mucosa	Digestive	Subjective Well Being	27089181	0.154343	0.0715465	2.04861	0.949642	0.27185	3.34e-12	5.29e-09	0.499748
iDnase	Esophagus	Digestive	Subjective Well Being	27089181	0.172967	0.0689286	2.48438	0.990042	0.132022	2.38e-09	5.41e-09	0.329946
iDnase	Fetal Intestine Large	Digestive	Subjective Well Being	27089181	0.0869045	0.0602213	1.22532	0.8491	0.79073	-5.91e-09	4.71e-09	0.894855
iDnase	Fetal Intestine Small	Digestive	Subjective Well Being	27089181	0.126649	0.0657076	1.52837	0.792942	0.506038	-3.42e-09	4.4e-09	0.781805
iDnase	Fetal Stomach	Digestive	Subjective Well Being	27089181	0.156912	0.0721978	1.7225	0.792552	0.364759	-3.31e-09	4.48e-09	0.76997
iDnase	Gastric	Digestive	Subjective Well Being	27089181	0.106502	0.0674835	1.56712	0.992982	0.568661	-3.86e-09	5.38e-09	0.763094
iDnase	Rectal Mucosa 1	Digestive	Subjective Well Being	27089181	0.161282	0.067859	2.20315	0.926973	0.196245	4.62e-10	5.23e-09	0.464791
iDnase	Rectal Mucosa 2	Digestive	Subjective Well Being	27089181	0.0948586	0.063516	1.30779	0.87568	0.725819	-5.65e-09	4.87e-09	0.877328
iDnase	Sigmoid Colon	Digestive	Subjective Well Being	27089181	0.121659	0.0653657	1.72272	0.925592	0.436083	-2.91e-09	5.24e-09	0.710789
iDnase	Small Intestine	Digestive	Subjective Well Being	27089181	0.157681	0.0711034	2.15314	0.970921	0.239103	2.12e-11	5.52e-09	0.49847
iDnase	Stomach Mucosa	Digestive	Subjective Well Being	27089181	0.161966	0.0662401	2.07782	0.849775	0.205511	1.9e-10	4.62e-09	0.483577
iDnase	Breast Myoepithelial Primary Cells	Epithelial	Subjective Well Being	27089181	0.265725	0.0787977	2.42454	0.71897	0.0485886	2.83e-09	4e-09	0.239663
iDnase	Breast variant Human Mammary Epithelial Cells (vHMEC)	Epithelial	Subjective Well Being	27089181	0.2331	0.0738457	2.06059	0.652791	0.10738	1.38e-09	3.58e-09	0.349865
iDnase	Foreskin Fibroblast Primary Cells skin 1	Epithelial	Subjective Well Being	27089181	0.20596	0.0720695	1.84492	0.645575	0.191081	-8.21e-10	3.62e-09	0.589816
iDnase	Foreskin Fibroblast Primary Cells skin 2	Epithelial	Subjective Well Being	27089181	0.174069	0.0729463	1.72959	0.724811	0.316078	-1.92e-09	4.06e-09	0.6817
iDnase	Foreskin Keratinocyte Primary Cells skin 1	Epithelial	Subjective Well Being	27089181	0.181493	0.0720897	1.94577	0.772868	0.224851	-2e-10	4.2e-09	0.519028
iDnase	Foreskin Keratinocyte Primary Cells skin 2	Epithelial	Subjective Well Being	27089181	0.247484	0.075	2.22943	0.67563	0.0700608	2.53e-09	3.72e-09	0.248349
iDnase	Foreskin Melanocyte Primary Cells skin 1	Epithelial	Subjective Well Being	27089181	0.111062	0.0731666	1.35482	0.89254	0.691401	-4.33e-09	4.74e-09	0.819496
iDnase	Foreskin Melanocyte Primary Cells skin 2	Epithelial	Subjective Well Being	27089181	0.205118	0.0761036	1.70428	0.632329	0.268861	-1.58e-09	3.57e-09	0.671319
iDnase	HeLa-S3 Cervical Carcinoma Cell Line	Epithelial	Subjective Well Being	27089181	0.143701	0.0752378	1.50945	0.790304	0.521336	-2.3e-09	4.78e-09	0.684615
iDnase	HMEC Mammary Epithelial Primary Cells	Epithelial	Subjective Well Being	27089181	0.196829	0.0695207	2.08614	0.736834	0.14428	1.3e-09	3.98e-09	0.371464
iDnase	NHDF-Ad Adult Dermal Fibroblast Primary Cells	Epithelial	Subjective Well Being	27089181	0.128091	0.0728052	1.44823	0.823157	0.587356	-3.45e-09	4.36e-09	0.785514
iDnase	NHEK-Epidermal Keratinocyte Primary Cells	Epithelial	Subjective Well Being	27089181	0.222816	0.0756734	2.01232	0.683429	0.141048	1.23e-09	3.8e-09	0.373379
iDnase	Aorta	Heart	Subjective Well Being	27089181	0.0918979	0.0696685	1.29713	0.983362	0.763092	-5.68e-09	5.11e-09	0.867048
iDnase	Fetal Heart	Heart	Subjective Well Being	27089181	0.246643	0.0800707	2.31806	0.75254	0.07874	1.46e-09	4.25e-09	0.365086
iDnase	Left Ventricle	Heart	Subjective Well Being	27089181	0.17084	0.0706213	2.16696	0.89577	0.190099	-1.97e-10	5.16e-09	0.515217
iDnase	Right Atrium	Heart	Subjective Well Being	27089181	0.17552	0.0701384	2.46858	0.986455	0.137701	1.61e-09	5.51e-09	0.385189
iDnase	Right Ventricle	Heart	Subjective Well Being	27089181	0.185523	0.0749724	1.98362	0.801609	0.224033	-1.09e-09	4.5e-09	0.595324
iDnase	Dnd41 TCell Leukemia Cell Line	Immune	Subjective Well Being	27089181	0.206852	0.0639547	2.80061	0.865896	0.0394453	5.72e-09	4.33e-09	0.0935217
iDnase	Fetal Thymus	Immune	Subjective Well Being	27089181	0.191609	0.0613199	2.80465	0.89756	0.0462839	6.36e-09	4.75e-09	0.0900286
iDnase	GM12878 Lymphoblastoid Cells	Immune	Subjective Well Being	27089181	0.223117	0.0687493	3.43869	1.05957	0.0234362	1.2e-08	5.95e-09	0.0220362
iDnase	K562 Leukemia Cells	Immune	Subjective Well Being	27089181	0.166131	0.0714267	2.00155	0.860548	0.244578	9.93e-10	5.27e-09	0.425307
iDnase	Monocytes-CD14+ RO01746 Primary Cells	Immune	Subjective Well Being	27089181	0.21613	0.0658913	2.56164	0.780963	0.0464308	5.97e-09	4.21e-09	0.07786
iDnase	Primary B cells from cord blood	Immune	Subjective Well Being	27089181	0.189485	0.0628128	3.26958	1.08384	0.0373417	1.05e-08	5.58e-09	0.0296423
iDnase	Primary B cells from peripheral blood	Immune	Subjective Well Being	27089181	0.193515	0.0607394	3.08472	0.968217	0.0329979	9.46e-09	5.14e-09	0.0327136
iDnase	Primary hematopoietic stem cells	Immune	Subjective Well Being	27089181	0.202972	0.0706914	3.72386	1.29695	0.0351348	1.21e-08	6.42e-09	0.0292839
iDnase	Primary hematopoietic stem cells G-CSF-mobilized Female	Immune	Subjective Well Being	27089181	0.263874	0.0770653	3.47587	1.01514	0.0146319	1.13e-08	5.56e-09	0.0212897
iDnase	Primary hematopoietic stem cells G-CSF-mobilized Male	Immune	Subjective Well Being	27089181	0.246689	0.0733719	2.97076	0.883585	0.0256902	7.99e-09	4.75e-09	0.0463236
iDnase	Primary hematopoietic stem cells short term culture	Immune	Subjective Well Being	27089181	0.197931	0.0743815	2.91399	1.09506	0.0811545	7.12e-09	5.89e-09	0.113398
iDnase	Primary monocytes from peripheral blood	Immune	Subjective Well Being	27089181	0.146084	0.0621141	2.20208	0.93631	0.203711	3.11e-09	4.97e-09	0.265514
iDnase	Primary mononuclear cells from peripheral blood	Immune	Subjective Well Being	27089181	0.198351	0.0801137	2.48679	1.00441	0.140676	3.36e-09	5.57e-09	0.273166
iDnase	Primary Natural Killer cells from peripheral blood	Immune	Subjective Well Being	27089181	0.158786	0.0584789	2.56622	0.945104	0.101073	5.44e-09	5.15e-09	0.145469
iDnase	Primary neutrophils from peripheral blood	Immune	Subjective Well Being	27089181	0.198802	0.0584041	2.99431	0.879667	0.0236579	8.85e-09	4.53e-09	0.0253071
iDnase	Primary T CD8+ memory cells from peripheral blood	Immune	Subjective Well Being	27089181	0.176412	0.0594537	3.08756	1.04056	0.0467622	8.51e-09	5.65e-09	0.0660057
iDnase	Primary T CD8+ naive cells from peripheral blood	Immune	Subjective Well Being	27089181	0.162591	0.0586134	2.88566	1.04027	0.0716543	6.57e-09	5.62e-09	0.121102
iDnase	Primary T cells effector/memory enriched from peripheral blood	Immune	Subjective Well Being	27089181	0.158774	0.0587761	3.01563	1.11635	0.0726225	7.56e-09	5.91e-09	0.100443
iDnase	Primary T cells from cord blood	Immune	Subjective Well Being	27089181	0.17985	0.0627737	3.64635	1.2727	0.0366528	1.12e-08	6.42e-09	0.0407121
iDnase	Primary T cells from peripheral blood	Immune	Subjective Well Being	27089181	0.182834	0.0565707	3.00787	0.930664	0.0327918	7.48e-09	5.09e-09	0.071021
iDnase	Primary T helper 17 cells PMA-I stimulated	Immune	Subjective Well Being	27089181	0.172514	0.0638032	2.76403	1.02226	0.0862691	5.62e-09	5.5e-09	0.153139
iDnase	Primary T helper cells from peripheral blood	Immune	Subjective Well Being	27089181	0.181751	0.0613898	2.9449	0.994692	0.0517442	7.1e-09	5.48e-09	0.0977293
iDnase	Primary T helper cells PMA-I stimulated	Immune	Subjective Well Being	27089181	0.201386	0.0592495	2.92486	0.860518	0.0254715	7.03e-09	4.55e-09	0.0611833
iDnase	Primary T helper memory cells from peripheral blood 1	Immune	Subjective Well Being	27089181	0.173466	0.059867	3.10256	1.07076	0.05129	8.23e-09	5.73e-09	0.075594
iDnase	Primary T helper memory cells from peripheral blood 2	Immune	Subjective Well Being	27089181	0.173516	0.0638056	2.72579	1.00233	0.0875774	5.52e-09	5.66e-09	0.164919
iDnase	Primary T helper naive cells from peripheral blood 1	Immune	Subjective Well Being	27089181	0.162269	0.0608209	2.78208	1.04277	0.0905551	5.78e-09	5.57e-09	0.149718
iDnase	Primary T helper naive cells from peripheral blood 2	Immune	Subjective Well Being	27089181	0.16072	0.0593562	2.67815	0.98908	0.0902275	4.75e-09	5.3e-09	0.185245
iDnase	Primary T regulatory cells from peripheral blood	Immune	Subjective Well Being	27089181	0.196411	0.060788	3.36624	1.04183	0.0236148	1.04e-08	5.65e-09	0.032202
iDnase	Spleen	Immune	Subjective Well Being	27089181	0.225769	0.0681391	3.20252	0.966548	0.0225868	8.42e-09	5.76e-09	0.0719815
iDnase	Thymus	Immune	Subjective Well Being	27089181	0.205179	0.0620603	3.62998	1.09796	0.0163069	1.16e-08	5.72e-09	0.0213802
iDnase	Adipose Derived Mesenchymal Stem Cell Cultured Cells	Mesench	Subjective Well Being	27089181	0.203456	0.080391	1.54197	0.609276	0.377998	-2.66e-09	3.59e-09	0.770422
iDnase	Bone Marrow Derived Cultured Mesenchymal Stem Cells	Mesench	Subjective Well Being	27089181	0.211958	0.0769005	1.88494	0.683874	0.199617	-6.08e-10	3.78e-09	0.56384
iDnase	Mesenchymal Stem Cell Derived Adipocyte Cultured Cells	Mesench	Subjective Well Being	27089181	0.217497	0.0819415	1.71138	0.644758	0.274542	-1.81e-09	3.7e-09	0.687415
iDnase	Mesenchymal Stem Cell Derived Chondrocyte Cultured Cells	Mesench	Subjective Well Being	27089181	0.236617	0.0779365	1.97105	0.649219	0.138555	-5.07e-10	3.62e-09	0.555744
iDnase	Fetal Muscle Leg	Muscle	Subjective Well Being	27089181	0.193772	0.0707004	2.3092	0.842545	0.125635	9.48e-10	4.66e-09	0.419315
iDnase	Fetal Muscle Trunk	Muscle	Subjective Well Being	27089181	0.191265	0.0691295	2.4242	0.876186	0.107507	1.87e-09	4.92e-09	0.352136
iDnase	HSMM cell derived Skeletal Muscle Myotubes Cells	Muscle	Subjective Well Being	27089181	0.220032	0.0749383	1.96707	0.66994	0.149526	-2.06e-10	3.71e-09	0.522136
iDnase	HSMM Skeletal Muscle Myoblasts Cells	Muscle	Subjective Well Being	27089181	0.18266	0.0760655	1.82187	0.758683	0.281568	-1.21e-09	4.12e-09	0.615467
iDnase	Muscle Satellite Cultured Cells	Muscle	Subjective Well Being	27089181	0.188206	0.0804109	1.62011	0.692191	0.37453	-2.35e-09	3.8e-09	0.732018
iDnase	Psoas Muscle	Muscle	Subjective Well Being	27089181	0.186513	0.0770254	2.10709	0.870179	0.203132	-3.55e-10	4.77e-09	0.529617
iDnase	Skeletal Muscle Female	Muscle	Subjective Well Being	27089181	0.206065	0.0745558	2.0436	0.739388	0.163427	-7.85e-10	4.25e-09	0.57325
iDnase	Skeletal Muscle Male	Muscle	Subjective Well Being	27089181	0.174327	0.0725455	2.0843	0.867375	0.21553	-9.9e-10	4.76e-09	0.582313
iDnase	A549 EtOH 0.02pct Lung Carcinoma Cell Line	Other	Subjective Well Being	27089181	0.1903	0.0723129	1.65347	0.628309	0.299736	-9.65e-10	3.78e-09	0.60067
iDnase	Fetal Kidney	Other	Subjective Well Being	27089181	0.0838374	0.0830129	1.03937	1.02915	0.969464	-7.28e-09	5.49e-09	0.907433
iDnase	Fetal Lung	Other	Subjective Well Being	27089181	0.175984	0.0786789	1.96589	0.878909	0.271868	-2.12e-09	5.04e-09	0.6631
iDnase	HepG2 Hepatocellular Carcinoma Cell Line	Other	Subjective Well Being	27089181	0.134275	0.0767051	1.36036	0.777111	0.644131	-4.65e-09	4.77e-09	0.834983
iDnase	HUVEC Umbilical Vein Endothelial Primary Cells	Other	Subjective Well Being	27089181	0.143806	0.0811312	1.42657	0.804832	0.597072	-3.47e-09	4.55e-09	0.777384
iDnase	Liver	Other	Subjective Well Being	27089181	0.197597	0.0712884	2.26828	0.818344	0.122691	1.34e-09	4.77e-09	0.389487
iDnase	Lung	Other	Subjective Well Being	27089181	0.128633	0.069547	1.80986	0.978522	0.408331	-2.71e-09	5.54e-09	0.687214
iDnase	NHLF Lung Fibroblast Primary Cells	Other	Subjective Well Being	27089181	0.0904411	0.0740582	1.01019	0.8272	0.990174	-6.2e-09	4.41e-09	0.920313
iDnase	Ovary	Other	Subjective Well Being	27089181	0.14842	0.078676	1.96195	1.04001	0.355788	-1.55e-09	5.67e-09	0.60795
iDnase	Pancreas	Other	Subjective Well Being	27089181	0.0942502	0.0674167	1.54016	1.10167	0.623586	-4.03e-09	5.89e-09	0.75294
iDnase	Pancreatic Islets	Other	Subjective Well Being	27089181	0.169991	0.0723558	2.95464	1.25763	0.118278	4.58e-09	6.62e-09	0.244653
iDnase	Placenta	Other	Subjective Well Being	27089181	0.170799	0.0663813	2.17732	0.846222	0.167109	1.06e-09	4.8e-09	0.412569
iDnase	Placenta Amnion	Other	Subjective Well Being	27089181	0.216001	0.0765398	2.18985	0.775974	0.127478	1.37e-09	4.27e-09	0.374346
iDnase	Colon Smooth Muscle	Sm. Muscle	Subjective Well Being	27089181	0.156452	0.0736155	1.74272	0.820004	0.366832	-3.73e-09	4.5e-09	0.79626
iDnase	Duodenum Smooth Muscle	Sm. Muscle	Subjective Well Being	27089181	0.196821	0.0805698	2.01042	0.822973	0.221246	-1.43e-09	4.78e-09	0.617729
iDnase	Rectal Smooth Muscle	Sm. Muscle	Subjective Well Being	27089181	0.124899	0.0676293	1.6853	0.912543	0.453248	-4.38e-09	4.85e-09	0.816819
iDnase	Stomach Smooth Muscle	Sm. Muscle	Subjective Well Being	27089181	0.141841	0.0678653	1.78715	0.855079	0.358878	-3.58e-09	4.61e-09	0.781042
iDnase	ES-I3 Cells	Stem-cells	Subjective Well Being	27089181	0.258562	0.0797778	2.82765	0.872456	0.0367361	4.68e-09	5.08e-09	0.178805
iDnase	ES-UCSF4 Cells	Stem-cells	Subjective Well Being	27089181	0.206536	0.0733386	3.03497	1.07768	0.0562119	5.88e-09	6.18e-09	0.170867
iDnase	ES-WA7 Cells	Stem-cells	Subjective Well Being	27089181	0.240058	0.0752982	3.72755	1.16921	0.0210824	1.07e-08	6.59e-09	0.0527369
iDnase	H1 BMP4 Derived Mesendoderm Cultured Cells	Stem-cells	Subjective Well Being	27089181	0.186958	0.0755765	2.75852	1.11511	0.115973	4e-09	6.07e-09	0.255076
iDnase	H1 BMP4 Derived Trophoblast Cultured Cells	Stem-cells	Subjective Well Being	27089181	0.195936	0.0790345	2.23656	0.902161	0.170388	1.47e-09	4.99e-09	0.383926
iDnase	H1 Cells	Stem-cells	Subjective Well Being	27089181	0.179787	0.0699735	2.76882	1.07763	0.0994461	3.95e-09	5.89e-09	0.251262
iDnase	H1 Derived Mesenchymal Stem Cells	Stem-cells	Subjective Well Being	27089181	0.15845	0.0754011	1.82314	0.867569	0.345029	-1.65e-09	4.54e-09	0.642035
iDnase	H9 Cells	Stem-cells	Subjective Well Being	27089181	0.165022	0.0700362	2.86265	1.21492	0.124852	4.53e-09	6.8e-09	0.25282
iDnase	hESC Derived CD184+ Endoderm Cultured Cells	Stem-cells	Subjective Well Being	27089181	0.364116	0.0920505	3.53159	0.892806	0.00495917	9.23e-09	5.35e-09	0.0422895
iDnase	hESC Derived CD56+ Ectoderm Cultured Cells	Stem-cells	Subjective Well Being	27089181	0.207773	0.0723843	3.1409	1.09423	0.0509548	5.26e-09	6.32e-09	0.202626
iDnase	hESC Derived CD56+ Mesoderm Cultured Cells	Stem-cells	Subjective Well Being	27089181	0.269103	0.0853603	2.59086	0.82183	0.0552719	3.2e-09	4.57e-09	0.241705
iDnase	HUES48 Cells	Stem-cells	Subjective Well Being	27089181	0.21809	0.0791292	2.80934	1.01931	0.0739907	4.13e-09	5.74e-09	0.236262
iDnase	HUES64 Cells	Stem-cells	Subjective Well Being	27089181	0.225578	0.0787694	2.89043	1.00931	0.0629225	4.54e-09	5.84e-09	0.218338
iDnase	HUES6 Cells	Stem-cells	Subjective Well Being	27089181	0.175342	0.0766214	2.19365	0.958586	0.212008	2.75e-10	5.49e-09	0.480019
iDnase	IMR90 fetal lung fibroblasts Cell Line	Stem-cells	Subjective Well Being	27089181	0.130475	0.0726179	1.22077	0.679437	0.745905	-5.08e-09	3.76e-09	0.911868
iDnase	iPS-15b Cells	Stem-cells	Subjective Well Being	27089181	0.135525	0.0742567	1.90749	1.04515	0.384879	-1.81e-09	5.88e-09	0.620585
iDnase	iPS-18 Cells	Stem-cells	Subjective Well Being	27089181	0.218439	0.0752966	2.89031	0.9963	0.057304	4.76e-09	5.76e-09	0.204514
iDnase	iPS-20b Cells	Stem-cells	Subjective Well Being	27089181	0.188827	0.0765714	2.57351	1.04359	0.130677	2.62e-09	5.81e-09	0.325859
iDnase	iPS DF 19.11 Cells	Stem-cells	Subjective Well Being	27089181	0.154127	0.0717369	2.29038	1.06604	0.226431	9.99e-10	6.07e-09	0.434653
iDnase	iPS DF 6.9 Cells	Stem-cells	Subjective Well Being	27089181	0.122001	0.0715104	2.27514	1.33356	0.33893	1.29e-09	7.32e-09	0.430031
iDnase	Brain Angular Gyrus	Brain	Neuroticism	27089181	0.298123	0.0485814	3.32425	0.541712	0.000209441	3.55e-08	1.09e-08	0.000578577
iDnase	Brain Anterior Caudate	Brain	Neuroticism	27089181	0.203969	0.0494952	2.21405	0.537261	0.0334595	9.54e-09	1.06e-08	0.184996
iDnase	Brain Cingulate Gyrus	Brain	Neuroticism	27089181	0.231825	0.0480183	2.52959	0.523958	0.00741008	1.75e-08	1.02e-08	0.0435939
iDnase	Brain Dorsolateral Prefrontal Cortex	Brain	Neuroticism	27089181	0.234709	0.0503243	2.70555	0.580099	0.00787216	2.18e-08	1.2e-08	0.0347337
iDnase	Brain Germinal Matrix	Brain	Neuroticism	27089181	0.300907	0.0480658	4.64017	0.741203	5.57e-05	5.47e-08	1.48e-08	0.000111244
iDnase	Brain Hippocampus Middle	Brain	Neuroticism	27089181	0.231724	0.0501976	2.25937	0.48944	0.0173268	1.29e-08	9.85e-09	0.0942962
iDnase	Brain Inferior Temporal Lobe	Brain	Neuroticism	27089181	0.262939	0.0482897	2.92387	0.53698	0.00149007	2.74e-08	1.06e-08	0.00478114
iDnase	Brain Substantia Nigra	Brain	Neuroticism	27089181	0.155233	0.0511548	1.70735	0.562634	0.221026	-2.79e-09	1.03e-08	0.606185
iDnase	Fetal Brain Female	Brain	Neuroticism	27089181	0.319549	0.0542267	3.29924	0.559872	0.000479798	3.11e-08	1.1e-08	0.0023452
iDnase	Fetal Brain Male	Brain	Neuroticism	27089181	0.294545	0.0524604	3.59339	0.640006	0.00064395	3.88e-08	1.32e-08	0.00165319
iDnase	Cortex derived primary cultured neurospheres	Brain	Neuroticism	27089181	0.289915	0.0468849	3.68677	0.596223	0.000138485	3.82e-08	1.13e-08	0.000351953
iDnase	Ganglion Eminence derived primary cultured neurospheres	Brain	Neuroticism	27089181	0.296227	0.0510533	3.78441	0.652226	0.000268154	3.98e-08	1.24e-08	0.000701417
iDnase	NH-A Astrocytes Primary Cells	Brain	Neuroticism	27089181	0.0869978	0.0553425	0.78173	0.497287	0.656465	-1.69e-08	8.79e-09	0.972803
iDnase	H1 Derived Neuronal Progenitor Cultured Cells	Stem-cells	Neuroticism	27089181	0.197432	0.0528146	3.16685	0.84716	0.0213758	2.95e-08	1.56e-08	0.0292925
iDnase	H9 Derived Neuronal Progenitor Cultured Cells	Stem-cells	Neuroticism	27089181	0.226599	0.0517874	3.02715	0.691829	0.00903637	2.76e-08	1.31e-08	0.0175312
iDnase	H9 Derived Neuron Cultured Cells	Stem-cells	Neuroticism	27089181	0.318499	0.0549349	3.98364	0.6871	0.000288244	4.62e-08	1.36e-08	0.000327715
iDnase	Adipose Nuclei	Adipose	Neuroticism	27089181	0.0937736	0.0501962	0.925239	0.495272	0.879762	-2.11e-08	1.01e-08	0.981103
iDnase	Fetal Adrenal Gland	Adrenal	Neuroticism	27089181	0.0839278	0.0443361	0.931106	0.49187	0.888158	-2.19e-08	9.62e-09	0.988529
iDnase	Osteoblast Primary Cells	Bone	Neuroticism	27089181	0.0473749	0.0496624	0.431747	0.452594	0.20334	-2.4e-08	8.64e-09	0.99727
iDnase	Colonic Mucosa	Digestive	Neuroticism	27089181	0.0651886	0.0429165	0.890948	0.586551	0.851213	-2.37e-08	1.1e-08	0.984174
iDnase	Duodenum Mucosa	Digestive	Neuroticism	27089181	0.137725	0.0466451	1.82804	0.619123	0.195012	1.19e-09	1.16e-08	0.459066
iDnase	Esophagus	Digestive	Neuroticism	27089181	0.032546	0.0439473	0.467468	0.631228	0.387164	-3.13e-08	1.1e-08	0.997864
iDnase	Fetal Intestine Large	Digestive	Neuroticism	27089181	0.0863485	0.039943	1.21748	0.563183	0.698381	-1.37e-08	1.11e-08	0.892276
iDnase	Fetal Intestine Small	Digestive	Neuroticism	27089181	0.111262	0.0423352	1.34269	0.51089	0.505562	-1.05e-08	9.94e-09	0.855411
iDnase	Fetal Stomach	Digestive	Neuroticism	27089181	0.0872688	0.0430039	0.957995	0.472076	0.928806	-2.17e-08	9.05e-09	0.991659
iDnase	Gastric	Digestive	Neuroticism	27089181	0.0486443	0.051812	0.715774	0.762386	0.701884	-2.63e-08	1.25e-08	0.982337
iDnase	Rectal Mucosa 1	Digestive	Neuroticism	27089181	0.0769344	0.0448576	1.05095	0.612767	0.933331	-1.97e-08	1.17e-08	0.95451
iDnase	Rectal Mucosa 2	Digestive	Neuroticism	27089181	0.082747	0.0427719	1.14081	0.589686	0.810372	-1.57e-08	1.16e-08	0.911853
iDnase	Sigmoid Colon	Digestive	Neuroticism	27089181	0.0790252	0.0420206	1.11901	0.595021	0.841009	-1.71e-08	1.12e-08	0.93664
iDnase	Small Intestine	Digestive	Neuroticism	27089181	0.0698232	0.044144	0.95344	0.60279	0.938087	-2.24e-08	1.19e-08	0.970596
iDnase	Stomach Mucosa	Digestive	Neuroticism	27089181	0.0998093	0.0459038	1.28043	0.588887	0.63449	-1.31e-08	1.08e-08	0.886131
iDnase	Breast Myoepithelial Primary Cells	Epithelial	Neuroticism	27089181	0.131913	0.0558139	1.2036	0.509259	0.690334	-8.55e-09	8.66e-09	0.838277
iDnase	Breast variant Human Mammary Epithelial Cells (vHMEC)	Epithelial	Neuroticism	27089181	0.129559	0.0557135	1.1453	0.492504	0.767919	-7.25e-09	8.19e-09	0.811945
iDnase	Foreskin Fibroblast Primary Cells skin 1	Epithelial	Neuroticism	27089181	0.11916	0.0460679	1.06739	0.412661	0.870216	-1.13e-08	7e-09	0.946793
iDnase	Foreskin Fibroblast Primary Cells skin 2	Epithelial	Neuroticism	27089181	0.0928859	0.0479411	0.922935	0.476353	0.869641	-1.57e-08	7.85e-09	0.977121
iDnase	Foreskin Keratinocyte Primary Cells skin 1	Epithelial	Neuroticism	27089181	0.107433	0.0497025	1.15178	0.532856	0.775911	-9.18e-09	8.76e-09	0.852795
iDnase	Foreskin Keratinocyte Primary Cells skin 2	Epithelial	Neuroticism	27089181	0.136848	0.0550599	1.23278	0.496002	0.640401	-5.56e-09	7.9e-09	0.75907
iDnase	Foreskin Melanocyte Primary Cells skin 1	Epithelial	Neuroticism	27089181	0.0631784	0.0467045	0.770696	0.569736	0.680645	-1.95e-08	9.26e-09	0.982449
iDnase	Foreskin Melanocyte Primary Cells skin 2	Epithelial	Neuroticism	27089181	0.14223	0.0536206	1.18176	0.445522	0.684625	-8.25e-09	8.29e-09	0.840238
iDnase	HeLa-S3 Cervical Carcinoma Cell Line	Epithelial	Neuroticism	27089181	0.0773712	0.0470062	0.812714	0.493758	0.7025	-1.75e-08	9.88e-09	0.96212
iDnase	HMEC Mammary Epithelial Primary Cells	Epithelial	Neuroticism	27089181	0.0965665	0.0490967	1.02349	0.520364	0.96385	-1.03e-08	8.77e-09	0.878843
iDnase	NHDF-Ad Adult Dermal Fibroblast Primary Cells	Epithelial	Neuroticism	27089181	0.0253729	0.0482056	0.286873	0.545026	0.181108	-2.7e-08	9.25e-09	0.998216
iDnase	NHEK-Epidermal Keratinocyte Primary Cells	Epithelial	Neuroticism	27089181	0.12714	0.0546659	1.14824	0.493704	0.763741	-7.2e-09	8.4e-09	0.804111
iDnase	Aorta	Heart	Neuroticism	27089181	0.0293858	0.0457604	0.414777	0.645902	0.359707	-3.03e-08	1.17e-08	0.995107
iDnase	Fetal Heart	Heart	Neuroticism	27089181	0.0751366	0.0567214	0.706167	0.533093	0.572619	-2.72e-08	9.86e-09	0.99712
iDnase	Left Ventricle	Heart	Neuroticism	27089181	0.0783588	0.0469732	0.993914	0.595814	0.991766	-2.08e-08	1.06e-08	0.975477
iDnase	Right Atrium	Heart	Neuroticism	27089181	0.061116	0.045346	0.85956	0.637764	0.82253	-2.43e-08	1.08e-08	0.987869
iDnase	Right Ventricle	Heart	Neuroticism	27089181	0.0608407	0.0569105	0.650512	0.608491	0.547242	-2.63e-08	1.04e-08	0.99451
iDnase	Dnd41 TCell Leukemia Cell Line	Immune	Neuroticism	27089181	0.0884867	0.0406657	1.19804	0.550581	0.719102	-9.72e-09	9.4e-09	0.849439
iDnase	Fetal Thymus	Immune	Neuroticism	27089181	0.111836	0.0380583	1.63698	0.557072	0.262787	-2.41e-10	1.03e-08	0.509307
iDnase	GM12878 Lymphoblastoid Cells	Immune	Neuroticism	27089181	0.0993475	0.050789	1.53115	0.782764	0.500363	-3.96e-09	1.45e-08	0.607302
iDnase	K562 Leukemia Cells	Immune	Neuroticism	27089181	0.140667	0.0485438	1.69476	0.584855	0.245874	-5.12e-10	1.15e-08	0.51776
iDnase	Monocytes-CD14+ RO01746 Primary Cells	Immune	Neuroticism	27089181	0.102739	0.0357807	1.2177	0.424084	0.609087	-7.32e-09	8.42e-09	0.807506
iDnase	Primary B cells from cord blood	Immune	Neuroticism	27089181	0.0934953	0.0390835	1.61327	0.674391	0.370381	1.55e-10	1.23e-08	0.494964
iDnase	Primary B cells from peripheral blood	Immune	Neuroticism	27089181	0.0849288	0.0412423	1.35381	0.657424	0.590019	-6.57e-09	1.19e-08	0.709404
iDnase	Primary hematopoietic stem cells	Immune	Neuroticism	27089181	0.137219	0.0393879	2.51751	0.722637	0.0441748	1.94e-08	1.28e-08	0.0643242
iDnase	Primary hematopoietic stem cells G-CSF-mobilized Female	Immune	Neuroticism	27089181	0.121654	0.039765	1.60248	0.523803	0.259234	-1.35e-09	1.07e-08	0.5502
iDnase	Primary hematopoietic stem cells G-CSF-mobilized Male	Immune	Neuroticism	27089181	0.147403	0.0394865	1.77511	0.475518	0.113632	4.54e-09	9.17e-09	0.310387
iDnase	Primary hematopoietic stem cells short term culture	Immune	Neuroticism	27089181	0.107105	0.0401485	1.57683	0.591076	0.335634	-2.33e-09	1.09e-08	0.584557
iDnase	Primary monocytes from peripheral blood	Immune	Neuroticism	27089181	0.0812393	0.0330981	1.2246	0.498922	0.653698	-7.68e-09	9.62e-09	0.787861
iDnase	Primary mononuclear cells from peripheral blood	Immune	Neuroticism	27089181	0.128064	0.0478591	1.60558	0.600026	0.321475	-9.72e-10	1.17e-08	0.533191
iDnase	Primary Natural Killer cells from peripheral blood	Immune	Neuroticism	27089181	0.0882781	0.0333715	1.4267	0.539331	0.434322	-3.21e-09	1.03e-08	0.62225
iDnase	Primary neutrophils from peripheral blood	Immune	Neuroticism	27089181	0.0669594	0.0296	1.00853	0.445828	0.984696	-1.21e-08	8.88e-09	0.912765
iDnase	Primary T CD8+ memory cells from peripheral blood	Immune	Neuroticism	27089181	0.087492	0.0332635	1.53129	0.58218	0.368147	-2.55e-09	1.14e-08	0.588915
iDnase	Primary T CD8+ naive cells from peripheral blood	Immune	Neuroticism	27089181	0.0937544	0.0326834	1.66395	0.580065	0.260935	1.91e-09	1.09e-08	0.430205
iDnase	Primary T cells effector/memory enriched from peripheral blood	Immune	Neuroticism	27089181	0.0984548	0.032195	1.86997	0.611485	0.166321	7.09e-09	1.14e-08	0.266285
iDnase	Primary T cells from cord blood	Immune	Neuroticism	27089181	0.111898	0.03408	2.26866	0.690951	0.0733446	1.42e-08	1.31e-08	0.138787
iDnase	Primary T cells from peripheral blood	Immune	Neuroticism	27089181	0.0827892	0.0326483	1.36199	0.537109	0.503973	-7.38e-09	1.02e-08	0.765461
iDnase	Primary T helper 17 cells PMA-I stimulated	Immune	Neuroticism	27089181	0.102116	0.0376614	1.63611	0.603413	0.302201	4.4e-10	1.12e-08	0.484377
iDnase	Primary T helper cells from peripheral blood	Immune	Neuroticism	27089181	0.117304	0.0349105	1.90066	0.565652	0.122603	8.14e-09	1.06e-08	0.221012
iDnase	Primary T helper cells PMA-I stimulated	Immune	Neuroticism	27089181	0.115705	0.0337231	1.68045	0.489782	0.177507	3.96e-09	8.93e-09	0.3289
iDnase	Primary T helper memory cells from peripheral blood 1	Immune	Neuroticism	27089181	0.0948393	0.0325297	1.69627	0.581816	0.241687	2.89e-09	1.09e-08	0.3959
iDnase	Primary T helper memory cells from peripheral blood 2	Immune	Neuroticism	27089181	0.0964195	0.0367285	1.51467	0.576974	0.379834	-2.53e-09	1.1e-08	0.59127
iDnase	Primary T helper naive cells from peripheral blood 1	Immune	Neuroticism	27089181	0.092094	0.035557	1.57894	0.609622	0.350568	-8.97e-10	1.13e-08	0.531726
iDnase	Primary T helper naive cells from peripheral blood 2	Immune	Neuroticism	27089181	0.108013	0.0340634	1.79988	0.567614	0.17073	5.43e-09	1.05e-08	0.302616
iDnase	Primary T regulatory cells from peripheral blood	Immune	Neuroticism	27089181	0.0938242	0.032042	1.60803	0.549158	0.276383	1.34e-09	1.08e-08	0.450458
iDnase	Spleen	Immune	Neuroticism	27089181	0.0819536	0.0412726	1.1625	0.585447	0.781632	-1.68e-08	1.09e-08	0.938748
iDnase	Thymus	Immune	Neuroticism	27089181	0.0814525	0.0366736	1.44104	0.648821	0.500005	-6.85e-09	1.17e-08	0.720464
iDnase	Adipose Derived Mesenchymal Stem Cell Cultured Cells	Mesench	Neuroticism	27089181	0.0564977	0.0502657	0.428191	0.380959	0.123695	-2.62e-08	7.49e-09	0.999765
iDnase	Bone Marrow Derived Cultured Mesenchymal Stem Cells	Mesench	Neuroticism	27089181	0.0373731	0.0509456	0.332358	0.453058	0.13546	-2.62e-08	8.68e-09	0.998754
iDnase	Mesenchymal Stem Cell Derived Adipocyte Cultured Cells	Mesench	Neuroticism	27089181	0.0511856	0.0504334	0.402755	0.396836	0.127559	-2.73e-08	8.19e-09	0.999564
iDnase	Mesenchymal Stem Cell Derived Chondrocyte Cultured Cells	Mesench	Neuroticism	27089181	0.0499068	0.0510652	0.415729	0.425379	0.165686	-2.6e-08	8.54e-09	0.998826
iDnase	Fetal Muscle Leg	Muscle	Neuroticism	27089181	0.0792638	0.0409199	0.944596	0.487648	0.909272	-2.13e-08	9.62e-09	0.986506
iDnase	Fetal Muscle Trunk	Muscle	Neuroticism	27089181	0.0828121	0.0434044	1.04961	0.550132	0.927859	-1.91e-08	1.04e-08	0.966561
iDnase	HSMM cell derived Skeletal Muscle Myotubes Cells	Muscle	Neuroticism	27089181	0.0822922	0.0524513	0.735683	0.468908	0.567083	-1.79e-08	8.31e-09	0.984224
iDnase	HSMM Skeletal Muscle Myoblasts Cells	Muscle	Neuroticism	27089181	0.0781802	0.0512932	0.779775	0.511602	0.662846	-1.68e-08	9.05e-09	0.967902
iDnase	Muscle Satellite Cultured Cells	Muscle	Neuroticism	27089181	0.0881309	0.048423	0.758646	0.416834	0.55775	-1.71e-08	7.71e-09	0.986852
iDnase	Psoas Muscle	Muscle	Neuroticism	27089181	0.059969	0.0487131	0.677488	0.550326	0.549793	-2.58e-08	9.75e-09	0.995905
iDnase	Skeletal Muscle Female	Muscle	Neuroticism	27089181	0.0804796	0.0423821	0.798136	0.420314	0.629576	-2.38e-08	9.47e-09	0.994101
iDnase	Skeletal Muscle Male	Muscle	Neuroticism	27089181	0.0834108	0.0401249	0.997283	0.479744	0.995474	-2.04e-08	1e-08	0.979131
iDnase	A549 EtOH 0.02pct Lung Carcinoma Cell Line	Other	Neuroticism	27089181	0.0962047	0.0519987	0.835899	0.451804	0.711973	-1.79e-08	9.5e-09	0.969926
iDnase	Fetal Kidney	Other	Neuroticism	27089181	0.0564333	0.0597356	0.699632	0.740571	0.678931	-2.53e-08	1.29e-08	0.975397
iDnase	Fetal Lung	Other	Neuroticism	27089181	0.0737128	0.0617509	0.823434	0.689809	0.794226	-2.56e-08	1.3e-08	0.975828
iDnase	HepG2 Hepatocellular Carcinoma Cell Line	Other	Neuroticism	27089181	0.0972584	0.0521751	0.985339	0.528593	0.977716	-1.76e-08	1.04e-08	0.955377
iDnase	HUVEC Umbilical Vein Endothelial Primary Cells	Other	Neuroticism	27089181	0.0555874	0.053164	0.551434	0.527393	0.387569	-2.51e-08	1.02e-08	0.993194
iDnase	Liver	Other	Neuroticism	27089181	0.133063	0.0492564	1.52748	0.565431	0.360327	-5.35e-09	1.05e-08	0.695044
iDnase	Lung	Other	Neuroticism	27089181	0.0434667	0.0474285	0.611573	0.667316	0.548315	-3.09e-08	1.11e-08	0.997306
iDnase	NHLF Lung Fibroblast Primary Cells	Other	Neuroticism	27089181	0.0272316	0.0457128	0.304166	0.510594	0.163366	-2.77e-08	9.03e-09	0.998942
iDnase	Ovary	Other	Neuroticism	27089181	0.052607	0.0503782	0.695408	0.665945	0.640672	-2.56e-08	1.14e-08	0.98764
iDnase	Pancreas	Other	Neuroticism	27089181	0.0215301	0.0507483	0.351828	0.829288	0.411289	-3.44e-08	1.25e-08	0.997
iDnase	Pancreatic Islets	Other	Neuroticism	27089181	0.061847	0.0444034	1.07498	0.771786	0.922452	-1.83e-08	1.41e-08	0.902288
iDnase	Placenta	Other	Neuroticism	27089181	0.0528659	0.044868	0.673929	0.571973	0.556619	-2.81e-08	1.04e-08	0.996598
iDnase	Placenta Amnion	Other	Neuroticism	27089181	0.101639	0.0555688	1.03044	0.563367	0.95663	-1.34e-08	1.01e-08	0.90729
iDnase	Colon Smooth Muscle	Sm. Muscle	Neuroticism	27089181	0.0555768	0.0488078	0.61907	0.54367	0.472166	-3.03e-08	9.6e-09	0.999202
iDnase	Duodenum Smooth Muscle	Sm. Muscle	Neuroticism	27089181	0.0668835	0.0533146	0.683176	0.544578	0.553659	-2.76e-08	1.08e-08	0.994827
iDnase	Rectal Smooth Muscle	Sm. Muscle	Neuroticism	27089181	0.0768351	0.0422305	1.03676	0.569829	0.948391	-1.96e-08	9.86e-09	0.976617
iDnase	Stomach Smooth Muscle	Sm. Muscle	Neuroticism	27089181	0.0821458	0.0412091	1.03501	0.519221	0.946125	-2e-08	9.55e-09	0.981777
iDnase	ES-I3 Cells	Stem-cells	Neuroticism	27089181	0.224564	0.0606589	2.45585	0.66337	0.0438858	1.74e-08	1.25e-08	0.0827625
iDnase	ES-UCSF4 Cells	Stem-cells	Neuroticism	27089181	0.263515	0.0511338	3.87225	0.751391	0.00131493	5.07e-08	1.65e-08	0.00103205
iDnase	ES-WA7 Cells	Stem-cells	Neuroticism	27089181	0.196036	0.0550031	3.04399	0.854074	0.0296488	2.84e-08	1.59e-08	0.0372922
iDnase	H1 BMP4 Derived Mesendoderm Cultured Cells	Stem-cells	Neuroticism	27089181	0.206725	0.0600515	3.05018	0.886047	0.0364064	2.85e-08	1.63e-08	0.0403028
iDnase	H1 BMP4 Derived Trophoblast Cultured Cells	Stem-cells	Neuroticism	27089181	0.076871	0.0592207	0.877466	0.675991	0.852425	-1.92e-08	1.06e-08	0.964528
iDnase	H1 Cells	Stem-cells	Neuroticism	27089181	0.220501	0.0514555	3.39583	0.792441	0.00833889	3.81e-08	1.6e-08	0.00874754
iDnase	H1 Derived Mesenchymal Stem Cells	Stem-cells	Neuroticism	27089181	0.0306279	0.0532528	0.352407	0.612729	0.275993	-2.9e-08	1.02e-08	0.997762
iDnase	H9 Cells	Stem-cells	Neuroticism	27089181	0.210841	0.051471	3.65747	0.89287	0.00903046	4.15e-08	1.71e-08	0.00768435
iDnase	hESC Derived CD184+ Endoderm Cultured Cells	Stem-cells	Neuroticism	27089181	0.194999	0.069804	1.89132	0.677035	0.204649	3.03e-09	1.29e-08	0.406786
iDnase	hESC Derived CD56+ Ectoderm Cultured Cells	Stem-cells	Neuroticism	27089181	0.219555	0.0487257	3.31901	0.736586	0.00542804	3.3e-08	1.38e-08	0.00856315
iDnase	hESC Derived CD56+ Mesoderm Cultured Cells	Stem-cells	Neuroticism	27089181	0.130527	0.0654972	1.25668	0.630592	0.684245	-9.2e-09	1.03e-08	0.8132
iDnase	HUES48 Cells	Stem-cells	Neuroticism	27089181	0.284428	0.0561943	3.66388	0.723871	0.00164402	4.47e-08	1.42e-08	0.000844453
iDnase	HUES64 Cells	Stem-cells	Neuroticism	27089181	0.252429	0.0581566	3.23449	0.745188	0.0086937	3.42e-08	1.45e-08	0.00915779
iDnase	HUES6 Cells	Stem-cells	Neuroticism	27089181	0.230856	0.0584743	2.88816	0.731553	0.0213628	2.73e-08	1.41e-08	0.0262182
iDnase	IMR90 fetal lung fibroblasts Cell Line	Stem-cells	Neuroticism	27089181	0.0765026	0.0497634	0.715784	0.465603	0.533279	-1.94e-08	7.78e-09	0.993796
iDnase	iPS-15b Cells	Stem-cells	Neuroticism	27089181	0.231919	0.0517388	3.26423	0.728216	0.00624172	3.46e-08	1.47e-08	0.00911563
iDnase	iPS-18 Cells	Stem-cells	Neuroticism	27089181	0.265976	0.0585567	3.51931	0.774803	0.00510976	4.11e-08	1.59e-08	0.00483495
iDnase	iPS-20b Cells	Stem-cells	Neuroticism	27089181	0.239257	0.0563942	3.26081	0.768593	0.0096804	3.48e-08	1.49e-08	0.00969337
iDnase	iPS DF 19.11 Cells	Stem-cells	Neuroticism	27089181	0.167195	0.052065	2.48458	0.773705	0.0755447	1.62e-08	1.45e-08	0.131322
iDnase	iPS DF 6.9 Cells	Stem-cells	Neuroticism	27089181	0.206263	0.049503	3.84649	0.923155	0.00698609	4.62e-08	1.81e-08	0.00530369
iDnase	Brain Angular Gyrus	Brain	Depressive Symptoms	27089181	0.34215	0.0833481	3.81519	0.929383	0.00356506	1.41e-08	8.97e-09	0.0574818
iDnase	Brain Anterior Caudate	Brain	Depressive Symptoms	27089181	0.30964	0.078139	3.36108	0.848184	0.00701362	1.02e-08	8.43e-09	0.113022
iDnase	Brain Cingulate Gyrus	Brain	Depressive Symptoms	27089181	0.257489	0.0800024	2.80962	0.872957	0.0447377	3.09e-09	8.54e-09	0.358969
iDnase	Brain Dorsolateral Prefrontal Cortex	Brain	Depressive Symptoms	27089181	0.25406	0.0767648	2.92861	0.884885	0.0360726	3.95e-09	9.03e-09	0.330956
iDnase	Brain Germinal Matrix	Brain	Depressive Symptoms	27089181	0.441472	0.0715766	6.80776	1.10375	1.17e-06	3.66e-08	9.87e-09	0.00010366
iDnase	Brain Hippocampus Middle	Brain	Depressive Symptoms	27089181	0.288035	0.0820261	2.80842	0.799777	0.0286497	5.93e-09	8.16e-09	0.233857
iDnase	Brain Inferior Temporal Lobe	Brain	Depressive Symptoms	27089181	0.283586	0.0809275	3.15347	0.899911	0.0217458	7.37e-09	8.69e-09	0.19812
iDnase	Brain Substantia Nigra	Brain	Depressive Symptoms	27089181	0.246675	0.0788091	2.71309	0.866793	0.0552113	2.35e-09	8.54e-09	0.391804
iDnase	Fetal Brain Female	Brain	Depressive Symptoms	27089181	0.375329	0.0872192	3.87514	0.90051	0.00232675	1.28e-08	8.73e-09	0.0719646
iDnase	Fetal Brain Male	Brain	Depressive Symptoms	27089181	0.413469	0.0769779	5.04423	0.939114	3.06e-05	2.52e-08	8.82e-09	0.00216231
iDnase	Cortex derived primary cultured neurospheres	Brain	Depressive Symptoms	27089181	0.428973	0.077954	5.45514	0.991321	3.35e-05	2.72e-08	9.53e-09	0.00216972
iDnase	Ganglion Eminence derived primary cultured neurospheres	Brain	Depressive Symptoms	27089181	0.41445	0.0820773	5.29475	1.04857	0.000122054	2.49e-08	9.72e-09	0.0051383
iDnase	NH-A Astrocytes Primary Cells	Brain	Depressive Symptoms	27089181	0.109058	0.0834986	0.979954	0.750287	0.978674	-1.01e-08	7.43e-09	0.913656
iDnase	H1 Derived Neuronal Progenitor Cultured Cells	Stem-cells	Depressive Symptoms	27089181	0.170327	0.0694951	2.73208	1.11472	0.131521	-1.08e-09	1.02e-08	0.542146
iDnase	H9 Derived Neuronal Progenitor Cultured Cells	Stem-cells	Depressive Symptoms	27089181	0.266311	0.0750791	3.55765	1.00298	0.0159995	9.17e-09	9.9e-09	0.177311
iDnase	H9 Derived Neuron Cultured Cells	Stem-cells	Depressive Symptoms	27089181	0.376838	0.0759689	4.71331	0.950184	0.000283019	2e-08	8.99e-09	0.01296
iDnase	Adipose Nuclei	Adipose	Depressive Symptoms	27089181	0.157207	0.0775747	1.55111	0.765409	0.474455	-9.14e-09	8.11e-09	0.870073
iDnase	Fetal Adrenal Gland	Adrenal	Depressive Symptoms	27089181	0.159774	0.0721268	1.77255	0.800184	0.338229	-8.94e-09	8.06e-09	0.866329
iDnase	Osteoblast Primary Cells	Bone	Depressive Symptoms	27089181	0.0746749	0.0813156	0.680545	0.741064	0.664456	-1.3e-08	7.42e-09	0.959644
iDnase	Colonic Mucosa	Digestive	Depressive Symptoms	27089181	0.0965939	0.0644981	1.32017	0.881511	0.717538	-1.7e-08	9.29e-09	0.966326
iDnase	Duodenum Mucosa	Digestive	Depressive Symptoms	27089181	0.217822	0.0623379	2.89117	0.827415	0.0223724	3.26e-09	8.68e-09	0.353809
iDnase	Esophagus	Digestive	Depressive Symptoms	27089181	0.0937337	0.066352	1.34632	0.953034	0.716666	-1.49e-08	1e-08	0.931505
iDnase	Fetal Intestine Large	Digestive	Depressive Symptoms	27089181	0.141253	0.0582922	1.99163	0.8219	0.231025	-8.56e-09	7.62e-09	0.869374
iDnase	Fetal Intestine Small	Digestive	Depressive Symptoms	27089181	0.158784	0.0620276	1.91616	0.748533	0.225524	-7.53e-09	7.08e-09	0.856087
iDnase	Fetal Stomach	Digestive	Depressive Symptoms	27089181	0.0826045	0.0712058	0.906793	0.781664	0.905012	-2.09e-08	8.01e-09	0.995401
iDnase	Gastric	Digestive	Depressive Symptoms	27089181	0.13991	0.0638168	2.05869	0.939029	0.262624	-7.7e-09	9.6e-09	0.788699
iDnase	Rectal Mucosa 1	Digestive	Depressive Symptoms	27089181	0.143053	0.0573241	1.95414	0.783064	0.226798	-9.4e-09	8.72e-09	0.859606
iDnase	Rectal Mucosa 2	Digestive	Depressive Symptoms	27089181	0.139282	0.0536525	1.92025	0.739694	0.215887	-8.88e-09	7.57e-09	0.87948
iDnase	Sigmoid Colon	Digestive	Depressive Symptoms	27089181	0.175214	0.0543166	2.48107	0.769134	0.0551211	-2.26e-09	8.49e-09	0.604725
iDnase	Small Intestine	Digestive	Depressive Symptoms	27089181	0.135538	0.0651034	1.85077	0.888991	0.341119	-1.01e-08	9.37e-09	0.859602
iDnase	Stomach Mucosa	Digestive	Depressive Symptoms	27089181	0.186245	0.0594538	2.38928	0.762716	0.0707767	-2.35e-09	8.04e-09	0.614761
iDnase	Breast Myoepithelial Primary Cells	Epithelial	Depressive Symptoms	27089181	0.106361	0.0853841	0.970466	0.779066	0.96977	-1.17e-08	7.49e-09	0.940578
iDnase	Breast variant Human Mammary Epithelial Cells (vHMEC)	Epithelial	Depressive Symptoms	27089181	0.100363	0.081248	0.887198	0.718227	0.875158	-9.83e-09	6.98e-09	0.920411
iDnase	Foreskin Fibroblast Primary Cells skin 1	Epithelial	Depressive Symptoms	27089181	0.147757	0.0762772	1.32356	0.683266	0.637138	-6.36e-09	6.92e-09	0.820937
iDnase	Foreskin Fibroblast Primary Cells skin 2	Epithelial	Depressive Symptoms	27089181	0.096057	0.0762379	0.954443	0.757516	0.951995	-1.19e-08	7.51e-09	0.943941
iDnase	Foreskin Keratinocyte Primary Cells skin 1	Epithelial	Depressive Symptoms	27089181	0.0909472	0.0767699	0.975038	0.823043	0.975806	-1.15e-08	8.23e-09	0.91945
iDnase	Foreskin Keratinocyte Primary Cells skin 2	Epithelial	Depressive Symptoms	27089181	0.104599	0.0803194	0.94227	0.72355	0.936405	-9.95e-09	6.87e-09	0.925993
iDnase	Foreskin Melanocyte Primary Cells skin 1	Epithelial	Depressive Symptoms	27089181	0.0627692	0.0761788	0.765705	0.929285	0.800054	-1.61e-08	8.94e-09	0.964478
iDnase	Foreskin Melanocyte Primary Cells skin 2	Epithelial	Depressive Symptoms	27089181	0.0834778	0.0861406	0.693599	0.715724	0.667212	-1.41e-08	7.11e-09	0.976306
iDnase	HeLa-S3 Cervical Carcinoma Cell Line	Epithelial	Depressive Symptoms	27089181	0.0872332	0.0719546	0.916305	0.755817	0.911804	-1.2e-08	7.74e-09	0.939446
iDnase	HMEC Mammary Epithelial Primary Cells	Epithelial	Depressive Symptoms	27089181	0.120963	0.073426	1.28206	0.778225	0.717998	-6.91e-09	7.55e-09	0.819775
iDnase	NHDF-Ad Adult Dermal Fibroblast Primary Cells	Epithelial	Depressive Symptoms	27089181	0.0183746	0.0799773	0.207748	0.904246	0.375723	-1.94e-08	8.55e-09	0.988327
iDnase	NHEK-Epidermal Keratinocyte Primary Cells	Epithelial	Depressive Symptoms	27089181	0.116454	0.0785705	1.05173	0.709594	0.941989	-8.39e-09	6.91e-09	0.887614
iDnase	Aorta	Heart	Depressive Symptoms	27089181	0.0107493	0.0670028	0.151725	0.945736	0.366682	-2.66e-08	8.82e-09	0.998718
iDnase	Fetal Heart	Heart	Depressive Symptoms	27089181	0.0345313	0.0839341	0.32454	0.788849	0.385335	-2.58e-08	8.33e-09	0.999043
iDnase	Left Ventricle	Heart	Depressive Symptoms	27089181	0.110397	0.0671327	1.4003	0.85152	0.640381	-1.4e-08	8.54e-09	0.949932
iDnase	Right Atrium	Heart	Depressive Symptoms	27089181	0.0792988	0.0672411	1.11529	0.945706	0.903138	-1.94e-08	9.46e-09	0.979849
iDnase	Right Ventricle	Heart	Depressive Symptoms	27089181	0.0266018	0.0804097	0.284428	0.859745	0.398116	-2.46e-08	8.88e-09	0.997165
iDnase	Dnd41 TCell Leukemia Cell Line	Immune	Depressive Symptoms	27089181	0.210484	0.0640921	2.84979	0.867756	0.0375061	5.9e-09	9.29e-09	0.262826
iDnase	Fetal Thymus	Immune	Depressive Symptoms	27089181	0.16861	0.0556988	2.46801	0.815282	0.0765395	-3.31e-10	8.56e-09	0.515432
iDnase	GM12878 Lymphoblastoid Cells	Immune	Depressive Symptoms	27089181	0.174188	0.0576566	2.68459	0.888606	0.0576476	1.97e-09	1.01e-08	0.422814
iDnase	K562 Leukemia Cells	Immune	Depressive Symptoms	27089181	0.233846	0.066091	2.81738	0.796263	0.0230495	6.45e-09	8.56e-09	0.22563
iDnase	Monocytes-CD14+ RO01746 Primary Cells	Immune	Depressive Symptoms	27089181	0.210888	0.0569485	2.4995	0.674971	0.0270512	4.96e-09	7.25e-09	0.247049
iDnase	Primary B cells from cord blood	Immune	Depressive Symptoms	27089181	0.17138	0.0524517	2.95718	0.90506	0.0317429	4.6e-09	9.32e-09	0.310567
iDnase	Primary B cells from peripheral blood	Immune	Depressive Symptoms	27089181	0.164116	0.050431	2.61609	0.803896	0.0461768	1.84e-09	8.81e-09	0.417361
iDnase	Primary hematopoietic stem cells	Immune	Depressive Symptoms	27089181	0.270788	0.061294	4.96806	1.12454	0.000432041	2.42e-08	1.1e-08	0.0142023
iDnase	Primary hematopoietic stem cells G-CSF-mobilized Female	Immune	Depressive Symptoms	27089181	0.253529	0.0646826	3.33961	0.852029	0.00648248	1.13e-08	9.25e-09	0.109981
iDnase	Primary hematopoietic stem cells G-CSF-mobilized Male	Immune	Depressive Symptoms	27089181	0.303318	0.0694824	3.65273	0.836746	0.00165385	1.67e-08	8.95e-09	0.031156
iDnase	Primary hematopoietic stem cells short term culture	Immune	Depressive Symptoms	27089181	0.278527	0.0652415	4.10054	0.960501	0.00143366	1.88e-08	1.01e-08	0.0311629
iDnase	Primary monocytes from peripheral blood	Immune	Depressive Symptoms	27089181	0.153681	0.0531594	2.3166	0.801327	0.103147	-4.58e-10	8.38e-09	0.521785
iDnase	Primary mononuclear cells from peripheral blood	Immune	Depressive Symptoms	27089181	0.134224	0.0688324	1.68281	0.862974	0.43152	-8.26e-09	9.41e-09	0.809826
iDnase	Primary Natural Killer cells from peripheral blood	Immune	Depressive Symptoms	27089181	0.161352	0.0477118	2.60768	0.771091	0.0393562	2.57e-09	8.52e-09	0.381524
iDnase	Primary neutrophils from peripheral blood	Immune	Depressive Symptoms	27089181	0.167189	0.0521732	2.51816	0.785819	0.0525147	2.53e-09	7.7e-09	0.37114
iDnase	Primary T CD8+ memory cells from peripheral blood	Immune	Depressive Symptoms	27089181	0.169098	0.0516201	2.95956	0.903458	0.0312773	3.93e-09	9.77e-09	0.343891
iDnase	Primary T CD8+ naive cells from peripheral blood	Immune	Depressive Symptoms	27089181	0.153698	0.0495948	2.72783	0.88021	0.050947	1.38e-09	9.27e-09	0.440623
iDnase	Primary T cells effector/memory enriched from peripheral blood	Immune	Depressive Symptoms	27089181	0.146121	0.048629	2.77531	0.923621	0.0571211	9.47e-10	9.99e-09	0.462246
iDnase	Primary T cells from cord blood	Immune	Depressive Symptoms	27089181	0.229677	0.0597553	4.65656	1.2115	0.00261664	2e-08	1.15e-08	0.0415835
iDnase	Primary T cells from peripheral blood	Immune	Depressive Symptoms	27089181	0.148748	0.0488613	2.44711	0.803834	0.0752811	-2.23e-09	8.64e-09	0.601621
iDnase	Primary T helper 17 cells PMA-I stimulated	Immune	Depressive Symptoms	27089181	0.143651	0.0554324	2.30158	0.888139	0.145121	-2.81e-09	9.73e-09	0.613772
iDnase	Primary T helper cells from peripheral blood	Immune	Depressive Symptoms	27089181	0.206375	0.0526737	3.34388	0.853466	0.00633456	1.06e-08	9.27e-09	0.127385
iDnase	Primary T helper cells PMA-I stimulated	Immune	Depressive Symptoms	27089181	0.173952	0.0490114	2.52642	0.711824	0.0340027	2.66e-09	7.87e-09	0.367646
iDnase	Primary T helper memory cells from peripheral blood 1	Immune	Depressive Symptoms	27089181	0.175778	0.0490585	3.1439	0.877444	0.0148721	6.88e-09	9.47e-09	0.233795
iDnase	Primary T helper memory cells from peripheral blood 2	Immune	Depressive Symptoms	27089181	0.164346	0.0529298	2.58174	0.831484	0.0579683	7.59e-10	9.31e-09	0.467528
iDnase	Primary T helper naive cells from peripheral blood 1	Immune	Depressive Symptoms	27089181	0.159151	0.0535434	2.72863	0.917996	0.0607414	1.77e-09	9.94e-09	0.429465
iDnase	Primary T helper naive cells from peripheral blood 2	Immune	Depressive Symptoms	27089181	0.167067	0.0504732	2.78391	0.841058	0.0360305	2.83e-09	9.14e-09	0.378255
iDnase	Primary T regulatory cells from peripheral blood	Immune	Depressive Symptoms	27089181	0.154322	0.049804	2.64488	0.853576	0.0549556	1.52e-09	9.19e-09	0.434533
iDnase	Spleen	Immune	Depressive Symptoms	27089181	0.152557	0.0606121	2.16401	0.859777	0.177843	-6.57e-09	9.56e-09	0.754086
iDnase	Thymus	Immune	Depressive Symptoms	27089181	0.164084	0.0561597	2.90293	0.993563	0.0587096	1.13e-09	9.75e-09	0.454013
iDnase	Adipose Derived Mesenchymal Stem Cell Cultured Cells	Mesench	Depressive Symptoms	27089181	0.0718626	0.0879576	0.544639	0.666623	0.490053	-1.49e-08	7e-09	0.983574
iDnase	Bone Marrow Derived Cultured Mesenchymal Stem Cells	Mesench	Depressive Symptoms	27089181	0.0770265	0.0821665	0.684995	0.730705	0.664644	-1.3e-08	7.35e-09	0.961334
iDnase	Mesenchymal Stem Cell Derived Adipocyte Cultured Cells	Mesench	Depressive Symptoms	27089181	0.0368747	0.086673	0.290149	0.681988	0.290638	-1.86e-08	7.27e-09	0.994629
iDnase	Mesenchymal Stem Cell Derived Chondrocyte Cultured Cells	Mesench	Depressive Symptoms	27089181	0.081731	0.087209	0.680828	0.726461	0.659032	-1.37e-08	7.61e-09	0.964251
iDnase	Fetal Muscle Leg	Muscle	Depressive Symptoms	27089181	0.0825782	0.0738514	0.984094	0.880095	0.985574	-1.98e-08	8.74e-09	0.988189
iDnase	Fetal Muscle Trunk	Muscle	Depressive Symptoms	27089181	0.100882	0.0703045	1.27864	0.891079	0.755945	-1.68e-08	9e-09	0.969107
iDnase	HSMM cell derived Skeletal Muscle Myotubes Cells	Muscle	Depressive Symptoms	27089181	0.12191	0.0837661	1.08986	0.748859	0.904651	-8.91e-09	7.15e-09	0.893681
iDnase	HSMM Skeletal Muscle Myoblasts Cells	Muscle	Depressive Symptoms	27089181	0.0897391	0.0805433	0.895065	0.803346	0.895868	-1.1e-08	7.8e-09	0.921714
iDnase	Muscle Satellite Cultured Cells	Muscle	Depressive Symptoms	27089181	0.14777	0.0828508	1.27203	0.713194	0.704438	-6.19e-09	7.11e-09	0.808231
iDnase	Psoas Muscle	Muscle	Depressive Symptoms	27089181	0.0649651	0.0781722	0.733931	0.883135	0.762205	-1.95e-08	8.61e-09	0.988154
iDnase	Skeletal Muscle Female	Muscle	Depressive Symptoms	27089181	0.123081	0.0723706	1.22063	0.717717	0.759355	-1.25e-08	7.67e-09	0.948693
iDnase	Skeletal Muscle Male	Muscle	Depressive Symptoms	27089181	0.128756	0.0737683	1.53945	0.881995	0.542918	-1.25e-08	8.72e-09	0.923259
iDnase	A549 EtOH 0.02pct Lung Carcinoma Cell Line	Other	Depressive Symptoms	27089181	0.183561	0.0694116	1.59491	0.6031	0.325754	-2.52e-09	6.57e-09	0.649302
iDnase	Fetal Kidney	Other	Depressive Symptoms	27089181	0.0931129	0.0793862	1.15437	0.98419	0.875471	-1.82e-08	9.56e-09	0.971634
iDnase	Fetal Lung	Other	Depressive Symptoms	27089181	0.12911	0.0797994	1.44227	0.891426	0.622003	-1.5e-08	9.61e-09	0.941082
iDnase	HepG2 Hepatocellular Carcinoma Cell Line	Other	Depressive Symptoms	27089181	0.0982911	0.0755956	0.995801	0.76587	0.995628	-1.39e-08	8.33e-09	0.952114
iDnase	HUVEC Umbilical Vein Endothelial Primary Cells	Other	Depressive Symptoms	27089181	0.0500066	0.0792813	0.496071	0.78648	0.51739	-1.85e-08	8.12e-09	0.988785
iDnase	Liver	Other	Depressive Symptoms	27089181	0.226249	0.0731328	2.59718	0.839516	0.0576871	3.18e-09	9.08e-09	0.362874
iDnase	Lung	Other	Depressive Symptoms	27089181	0.109297	0.0622271	1.5378	0.875531	0.541582	-1.42e-08	9.7e-09	0.928597
iDnase	NHLF Lung Fibroblast Primary Cells	Other	Depressive Symptoms	27089181	0.03266	0.0757847	0.364799	0.846485	0.4475	-1.83e-08	8.11e-09	0.987894
iDnase	Ovary	Other	Depressive Symptoms	27089181	0.078363	0.0712802	1.03588	0.942248	0.969618	-1.79e-08	9.13e-09	0.975044
iDnase	Pancreas	Other	Depressive Symptoms	27089181	0.139054	0.0615156	2.2723	1.00524	0.209392	-6.87e-09	1.01e-08	0.752817
iDnase	Pancreatic Islets	Other	Depressive Symptoms	27089181	0.155135	0.0717157	2.69643	1.24651	0.176305	-4.09e-09	1.21e-08	0.632928
iDnase	Placenta	Other	Depressive Symptoms	27089181	0.093638	0.0596147	1.19369	0.759961	0.799517	-1.71e-08	8.05e-09	0.98314
iDnase	Placenta Amnion	Other	Depressive Symptoms	27089181	0.0466976	0.0787451	0.473429	0.798332	0.507099	-1.83e-08	8.23e-09	0.987014
iDnase	Colon Smooth Muscle	Sm. Muscle	Depressive Symptoms	27089181	0.0683187	0.0725674	0.761003	0.808329	0.766606	-2.24e-08	8.47e-09	0.995867
iDnase	Duodenum Smooth Muscle	Sm. Muscle	Depressive Symptoms	27089181	0.105562	0.0743979	1.07825	0.759931	0.918006	-1.61e-08	8.27e-09	0.974263
iDnase	Rectal Smooth Muscle	Sm. Muscle	Depressive Symptoms	27089181	0.125803	0.0643771	1.6975	0.868661	0.427249	-1.23e-08	8.47e-09	0.92745
iDnase	Stomach Smooth Muscle	Sm. Muscle	Depressive Symptoms	27089181	0.0860259	0.0650742	1.0839	0.819913	0.918589	-1.96e-08	8.07e-09	0.992373
iDnase	ES-I3 Cells	Stem-cells	Depressive Symptoms	27089181	0.154847	0.0793432	1.69342	0.867703	0.432164	-7.75e-09	8.63e-09	0.815491
iDnase	ES-UCSF4 Cells	Stem-cells	Depressive Symptoms	27089181	0.252465	0.0643356	3.70988	0.945386	0.00690804	1.21e-08	9.49e-09	0.100998
iDnase	ES-WA7 Cells	Stem-cells	Depressive Symptoms	27089181	0.173618	0.0688239	2.6959	1.06868	0.121019	9.07e-10	1.01e-08	0.46427
iDnase	H1 BMP4 Derived Mesendoderm Cultured Cells	Stem-cells	Depressive Symptoms	27089181	0.130538	0.072466	1.92606	1.06922	0.392322	-8.14e-09	9.86e-09	0.795375
iDnase	H1 BMP4 Derived Trophoblast Cultured Cells	Stem-cells	Depressive Symptoms	27089181	0.102447	0.0654905	1.16941	0.74756	0.821616	-1.32e-08	7.3e-09	0.964774
iDnase	H1 Cells	Stem-cells	Depressive Symptoms	27089181	0.239284	0.0695139	3.6851	1.07055	0.0170162	1.11e-08	1.05e-08	0.145216
iDnase	H1 Derived Mesenchymal Stem Cells	Stem-cells	Depressive Symptoms	27089181	0.0802432	0.0754634	0.923283	0.868286	0.929519	-1.41e-08	8.52e-09	0.950855
iDnase	H9 Cells	Stem-cells	Depressive Symptoms	27089181	0.210223	0.064847	3.64675	1.1249	0.024305	8.33e-09	1.08e-08	0.220673
iDnase	hESC Derived CD184+ Endoderm Cultured Cells	Stem-cells	Depressive Symptoms	27089181	0.185879	0.084978	1.80285	0.824209	0.33939	-6.67e-09	8.69e-09	0.778525
iDnase	hESC Derived CD56+ Ectoderm Cultured Cells	Stem-cells	Depressive Symptoms	27089181	0.231476	0.0728217	3.49922	1.10084	0.0303559	6.26e-09	1.07e-08	0.279347
iDnase	hESC Derived CD56+ Mesoderm Cultured Cells	Stem-cells	Depressive Symptoms	27089181	0.132085	0.0847454	1.27168	0.81591	0.740748	-1.01e-08	8.04e-09	0.89483
iDnase	HUES48 Cells	Stem-cells	Depressive Symptoms	27089181	0.288499	0.0772235	3.71633	0.994761	0.00960819	1.3e-08	9.96e-09	0.096465
iDnase	HUES64 Cells	Stem-cells	Depressive Symptoms	27089181	0.261666	0.0771798	3.35285	0.98894	0.0241527	8.74e-09	9.92e-09	0.189089
iDnase	HUES6 Cells	Stem-cells	Depressive Symptoms	27089181	0.196361	0.0756615	2.45661	0.946577	0.136658	-6.86e-10	9.33e-09	0.529293
iDnase	IMR90 fetal lung fibroblasts Cell Line	Stem-cells	Depressive Symptoms	27089181	0.100331	0.0767621	0.93873	0.718212	0.931893	-1.14e-08	7.25e-09	0.942557
iDnase	iPS-15b Cells	Stem-cells	Depressive Symptoms	27089181	0.227558	0.0715058	3.20284	1.00643	0.0357195	5.99e-09	9.79e-09	0.270423
iDnase	iPS-18 Cells	Stem-cells	Depressive Symptoms	27089181	0.25935	0.0784396	3.43163	1.03789	0.0268455	9.06e-09	1.08e-08	0.200591
iDnase	iPS-20b Cells	Stem-cells	Depressive Symptoms	27089181	0.243399	0.0714162	3.31727	0.973327	0.0230011	7.92e-09	9.6e-09	0.204736
iDnase	iPS DF 19.11 Cells	Stem-cells	Depressive Symptoms	27089181	0.133833	0.0681481	1.98881	1.01271	0.339988	-8.12e-09	9.85e-09	0.795202
iDnase	iPS DF 6.9 Cells	Stem-cells	Depressive Symptoms	27089181	0.206595	0.0651712	3.85268	1.21534	0.0237694	1.06e-08	1.13e-08	0.173248
iDnase	Brain Angular Gyrus	Brain	Chronotype	27494321	0.211494	0.048351	2.35829	0.539143	0.0124521	1.26e-08	1.15e-08	0.136651
iDnase	Brain Anterior Caudate	Brain	Chronotype	27494321	0.163073	0.047302	1.77013	0.513454	0.136056	-2.68e-09	1.15e-08	0.592191
iDnase	Brain Cingulate Gyrus	Brain	Chronotype	27494321	0.169147	0.0466651	1.84567	0.509192	0.0989605	-9.9e-10	1.13e-08	0.534845
iDnase	Brain Dorsolateral Prefrontal Cortex	Brain	Chronotype	27494321	0.158698	0.045816	1.82935	0.528131	0.119609	-1.24e-09	1.23e-08	0.54043
iDnase	Brain Germinal Matrix	Brain	Chronotype	27494321	0.273069	0.0478413	4.21088	0.737742	2.45e-05	4.65e-08	1.51e-08	0.00102764
iDnase	Brain Hippocampus Middle	Brain	Chronotype	27494321	0.173811	0.0456188	1.69471	0.444796	0.122322	-2.99e-09	1.04e-08	0.613428
iDnase	Brain Inferior Temporal Lobe	Brain	Chronotype	27494321	0.190754	0.0470153	2.12118	0.522808	0.0335107	6.58e-09	1.17e-08	0.287314
iDnase	Brain Substantia Nigra	Brain	Chronotype	27494321	0.130457	0.0432939	1.43485	0.476174	0.362199	-1.16e-08	1.09e-08	0.857342
iDnase	Fetal Brain Female	Brain	Chronotype	27494321	0.207947	0.0547547	2.14698	0.565324	0.0451248	6.93e-09	1.2e-08	0.281146
iDnase	Fetal Brain Male	Brain	Chronotype	27494321	0.24089	0.0496097	2.93881	0.605228	0.00163199	2.55e-08	1.27e-08	0.022759
iDnase	Cortex derived primary cultured neurospheres	Brain	Chronotype	27494321	0.244192	0.0458928	3.10532	0.583607	0.000380059	2.68e-08	1.22e-08	0.0138622
iDnase	Ganglion Eminence derived primary cultured neurospheres	Brain	Chronotype	27494321	0.252059	0.0476917	3.22014	0.60928	0.000316125	2.93e-08	1.23e-08	0.00852944
iDnase	NH-A Astrocytes Primary Cells	Brain	Chronotype	27494321	0.0537625	0.0472951	0.48309	0.424976	0.22739	-2.34e-08	9.24e-09	0.994277
iDnase	H1 Derived Neuronal Progenitor Cultured Cells	Stem-cells	Chronotype	27494321	0.0654976	0.0459929	1.0506	0.737738	0.94536	-2.1e-08	1.53e-08	0.914805
iDnase	H9 Derived Neuronal Progenitor Cultured Cells	Stem-cells	Chronotype	27494321	0.175774	0.049704	2.34817	0.663997	0.045764	1.28e-08	1.57e-08	0.207425
iDnase	H9 Derived Neuron Cultured Cells	Stem-cells	Chronotype	27494321	0.260633	0.0523925	3.25988	0.655302	0.000837088	3.31e-08	1.45e-08	0.0111596
iDnase	Adipose Nuclei	Adipose	Chronotype	27494321	0.0621325	0.0431684	0.613044	0.425931	0.360506	-3.02e-08	1.03e-08	0.998339
iDnase	Fetal Adrenal Gland	Adrenal	Chronotype	27494321	0.0472622	0.0423425	0.524334	0.469754	0.307991	-3.41e-08	1.07e-08	0.999318
iDnase	Osteoblast Primary Cells	Bone	Chronotype	27494321	0.0333236	0.042394	0.303692	0.386355	0.0739499	-2.84e-08	8.58e-09	0.999537
iDnase	Colonic Mucosa	Digestive	Chronotype	27494321	0.0413189	0.0397892	0.564716	0.543808	0.421873	-3.44e-08	1.29e-08	0.996278
iDnase	Duodenum Mucosa	Digestive	Chronotype	27494321	0.0451652	0.0398941	0.599481	0.529517	0.448413	-3.23e-08	1.31e-08	0.993287
iDnase	Esophagus	Digestive	Chronotype	27494321	0.0400817	0.0394452	0.575706	0.566562	0.454729	-3e-08	1.31e-08	0.98927
iDnase	Fetal Intestine Large	Digestive	Chronotype	27494321	0.0480987	0.0358812	0.678176	0.505912	0.52376	-3.13e-08	1.16e-08	0.996574
iDnase	Fetal Intestine Small	Digestive	Chronotype	27494321	0.0670691	0.0388289	0.809372	0.468577	0.683869	-2.55e-08	1.17e-08	0.985452
iDnase	Fetal Stomach	Digestive	Chronotype	27494321	0.0101305	0.0406202	0.111207	0.445909	0.0431602	-4.83e-08	1.05e-08	0.999998
iDnase	Gastric	Digestive	Chronotype	27494321	-0.00044421	0.0389093	-0.0065363	0.57253	0.0805366	-4.73e-08	1.34e-08	0.999781
iDnase	Rectal Mucosa 1	Digestive	Chronotype	27494321	0.0113824	0.0415039	0.155487	0.566955	0.136049	-4.71e-08	1.4e-08	0.999617
iDnase	Rectal Mucosa 2	Digestive	Chronotype	27494321	0.015563	0.0392038	0.214564	0.540493	0.145922	-4.31e-08	1.3e-08	0.999543
iDnase	Sigmoid Colon	Digestive	Chronotype	27494321	0.037731	0.0385933	0.534278	0.54649	0.393528	-3.46e-08	1.33e-08	0.99525
iDnase	Small Intestine	Digestive	Chronotype	27494321	0.0115762	0.0407978	0.158073	0.557097	0.131386	-4.52e-08	1.4e-08	0.999398
iDnase	Stomach Mucosa	Digestive	Chronotype	27494321	0.0370789	0.0392192	0.475675	0.503133	0.297615	-3.47e-08	1.28e-08	0.996709
iDnase	Breast Myoepithelial Primary Cells	Epithelial	Chronotype	27494321	0.0633915	0.0506881	0.578399	0.46249	0.360584	-2.35e-08	1e-08	0.990569
iDnase	Breast variant Human Mammary Epithelial Cells (vHMEC)	Epithelial	Chronotype	27494321	0.0537242	0.0497031	0.474918	0.439372	0.232164	-2.27e-08	8.92e-09	0.994538
iDnase	Foreskin Fibroblast Primary Cells skin 1	Epithelial	Chronotype	27494321	0.0572259	0.0416396	0.51261	0.372993	0.192244	-2.55e-08	8.9e-09	0.99791
iDnase	Foreskin Fibroblast Primary Cells skin 2	Epithelial	Chronotype	27494321	0.0577897	0.0422291	0.574211	0.419598	0.311466	-2.47e-08	9.76e-09	0.994291
iDnase	Foreskin Keratinocyte Primary Cells skin 1	Epithelial	Chronotype	27494321	0.0281842	0.0459976	0.302161	0.493137	0.156935	-2.95e-08	1.04e-08	0.997683
iDnase	Foreskin Keratinocyte Primary Cells skin 2	Epithelial	Chronotype	27494321	0.0617557	0.049311	0.55632	0.444213	0.316637	-2.13e-08	9.37e-09	0.98862
iDnase	Foreskin Melanocyte Primary Cells skin 1	Epithelial	Chronotype	27494321	0.0336597	0.0434371	0.410606	0.529878	0.267652	-2.98e-08	1.18e-08	0.994257
iDnase	Foreskin Melanocyte Primary Cells skin 2	Epithelial	Chronotype	27494321	0.13679	0.0509524	1.13656	0.423353	0.746689	-8.98e-09	9.24e-09	0.834338
iDnase	HeLa-S3 Cervical Carcinoma Cell Line	Epithelial	Chronotype	27494321	0.0212007	0.042571	0.222694	0.44717	0.0863001	-3.15e-08	9.88e-09	0.99929
iDnase	HMEC Mammary Epithelial Primary Cells	Epithelial	Chronotype	27494321	0.0493091	0.0458346	0.522615	0.485791	0.326662	-2.14e-08	9.72e-09	0.985962
iDnase	NHDF-Ad Adult Dermal Fibroblast Primary Cells	Epithelial	Chronotype	27494321	0.0177176	0.0397599	0.200321	0.449537	0.0778716	-2.98e-08	9.57e-09	0.999084
iDnase	NHEK-Epidermal Keratinocyte Primary Cells	Epithelial	Chronotype	27494321	0.0272678	0.0479492	0.246263	0.433044	0.0824977	-2.81e-08	9.26e-09	0.998804
iDnase	Aorta	Heart	Chronotype	27494321	0.0247074	0.0417111	0.348742	0.588747	0.270729	-3.43e-08	1.32e-08	0.995376
iDnase	Fetal Heart	Heart	Chronotype	27494321	0.0173236	0.0486158	0.162814	0.456913	0.0666266	-4.24e-08	1.07e-08	0.999961
iDnase	Left Ventricle	Heart	Chronotype	27494321	0.0554361	0.0369555	0.703158	0.468749	0.526744	-3.01e-08	1.1e-08	0.996842
iDnase	Right Atrium	Heart	Chronotype	27494321	0.00301941	0.0384904	0.0424662	0.541344	0.0774758	-5.02e-08	1.22e-08	0.999982
iDnase	Right Ventricle	Heart	Chronotype	27494321	0.0438103	0.0446763	0.468422	0.477682	0.26632	-3.29e-08	1.08e-08	0.998878
iDnase	Dnd41 TCell Leukemia Cell Line	Immune	Chronotype	27494321	0.123076	0.0386395	1.66635	0.523148	0.19916	9.89e-10	1.14e-08	0.465543
iDnase	Fetal Thymus	Immune	Chronotype	27494321	0.110085	0.036325	1.61135	0.531701	0.248922	-2.85e-09	1.27e-08	0.589138
iDnase	GM12878 Lymphoblastoid Cells	Immune	Chronotype	27494321	0.0765888	0.0430948	1.18039	0.66418	0.785804	-1.28e-08	1.57e-08	0.792175
iDnase	K562 Leukemia Cells	Immune	Chronotype	27494321	0.0890494	0.0485599	1.07287	0.585049	0.900877	-1.06e-08	1.36e-08	0.782623
iDnase	Monocytes-CD14+ RO01746 Primary Cells	Immune	Chronotype	27494321	0.138647	0.0374702	1.64329	0.444108	0.148427	3.88e-09	1.05e-08	0.355889
iDnase	Primary B cells from cord blood	Immune	Chronotype	27494321	0.0979731	0.0380945	1.69054	0.657326	0.294177	-2.17e-09	1.51e-08	0.557149
iDnase	Primary B cells from peripheral blood	Immune	Chronotype	27494321	0.107904	0.0373476	1.72005	0.595339	0.227009	1.93e-09	1.36e-08	0.443753
iDnase	Primary hematopoietic stem cells	Immune	Chronotype	27494321	0.124919	0.041844	2.29185	0.767698	0.0917351	1.24e-08	1.68e-08	0.23098
iDnase	Primary hematopoietic stem cells G-CSF-mobilized Female	Immune	Chronotype	27494321	0.1291	0.0437934	1.70057	0.576867	0.222373	2.48e-09	1.4e-08	0.429513
iDnase	Primary hematopoietic stem cells G-CSF-mobilized Male	Immune	Chronotype	27494321	0.166895	0.0446185	2.00984	0.53732	0.0588316	1.2e-08	1.26e-08	0.170437
iDnase	Primary hematopoietic stem cells short term culture	Immune	Chronotype	27494321	0.11452	0.0410823	1.68599	0.604824	0.255128	1.03e-09	1.38e-08	0.470056
iDnase	Primary monocytes from peripheral blood	Immune	Chronotype	27494321	0.118894	0.0362574	1.79222	0.546545	0.147951	5.21e-09	1.24e-08	0.336994
iDnase	Primary mononuclear cells from peripheral blood	Immune	Chronotype	27494321	0.109395	0.0497755	1.37152	0.624052	0.550881	-6.55e-09	1.46e-08	0.672777
iDnase	Primary Natural Killer cells from peripheral blood	Immune	Chronotype	27494321	0.118143	0.034575	1.90936	0.558782	0.103015	5.82e-09	1.29e-08	0.326415
iDnase	Primary neutrophils from peripheral blood	Immune	Chronotype	27494321	0.115655	0.0356817	1.74196	0.537429	0.169081	3.69e-09	1.21e-08	0.380523
iDnase	Primary T CD8+ memory cells from peripheral blood	Immune	Chronotype	27494321	0.0968418	0.0377684	1.69493	0.661024	0.28786	-3.11e-09	1.55e-08	0.579423
iDnase	Primary T CD8+ naive cells from peripheral blood	Immune	Chronotype	27494321	0.101364	0.037177	1.799	0.659818	0.221609	-1.51e-09	1.52e-08	0.539424
iDnase	Primary T cells effector/memory enriched from peripheral blood	Immune	Chronotype	27494321	0.0894343	0.0344219	1.69864	0.653782	0.281599	-6.16e-09	1.49e-08	0.659805
iDnase	Primary T cells from cord blood	Immune	Chronotype	27494321	0.0824479	0.0385017	1.67158	0.780599	0.386531	-6.95e-09	1.74e-08	0.655178
iDnase	Primary T cells from peripheral blood	Immune	Chronotype	27494321	0.107467	0.0355572	1.76797	0.584964	0.186674	-1.67e-09	1.41e-08	0.54718
iDnase	Primary T helper 17 cells PMA-I stimulated	Immune	Chronotype	27494321	0.0955271	0.037724	1.53054	0.604415	0.376878	-6.22e-09	1.44e-08	0.666549
iDnase	Primary T helper cells from peripheral blood	Immune	Chronotype	27494321	0.109845	0.0365184	1.77981	0.591703	0.183121	-2.49e-10	1.39e-08	0.507158
iDnase	Primary T helper cells PMA-I stimulated	Immune	Chronotype	27494321	0.117904	0.0336353	1.71239	0.488507	0.140008	-2.43e-10	1.14e-08	0.508517
iDnase	Primary T helper memory cells from peripheral blood 1	Immune	Chronotype	27494321	0.0950458	0.0351947	1.69996	0.629481	0.262671	-4.35e-09	1.45e-08	0.617854
iDnase	Primary T helper memory cells from peripheral blood 2	Immune	Chronotype	27494321	0.0909791	0.0370375	1.42921	0.581829	0.457349	-9.6e-09	1.37e-08	0.757761
iDnase	Primary T helper naive cells from peripheral blood 1	Immune	Chronotype	27494321	0.0933069	0.036883	1.59974	0.632356	0.339535	-5.4e-09	1.46e-08	0.643981
iDnase	Primary T helper naive cells from peripheral blood 2	Immune	Chronotype	27494321	0.110583	0.0356063	1.8427	0.593324	0.151327	1.44e-10	1.35e-08	0.495744
iDnase	Primary T regulatory cells from peripheral blood	Immune	Chronotype	27494321	0.0822656	0.0348676	1.40992	0.597586	0.49112	-1.16e-08	1.42e-08	0.793688
iDnase	Spleen	Immune	Chronotype	27494321	0.0824402	0.0389424	1.16941	0.552394	0.759176	-1.6e-08	1.38e-08	0.877438
iDnase	Thymus	Immune	Chronotype	27494321	0.0556332	0.0385289	0.984249	0.681644	0.981551	-2.46e-08	1.55e-08	0.943378
iDnase	Adipose Derived Mesenchymal Stem Cell Cultured Cells	Mesench	Chronotype	27494321	0.0258846	0.046224	0.196177	0.350327	0.0220744	-3.35e-08	8.39e-09	0.999968
iDnase	Bone Marrow Derived Cultured Mesenchymal Stem Cells	Mesench	Chronotype	27494321	0.0250553	0.0423222	0.222816	0.376371	0.0405474	-3.08e-08	8.41e-09	0.999878
iDnase	Mesenchymal Stem Cell Derived Adipocyte Cultured Cells	Mesench	Chronotype	27494321	0.00698732	0.0467776	0.0549798	0.36807	0.01025	-3.77e-08	8.61e-09	0.999994
iDnase	Mesenchymal Stem Cell Derived Chondrocyte Cultured Cells	Mesench	Chronotype	27494321	0.0573337	0.0459704	0.477596	0.382938	0.173471	-2.6e-08	8.71e-09	0.998556
iDnase	Fetal Muscle Leg	Muscle	Chronotype	27494321	0.0262628	0.0388776	0.312977	0.463309	0.13471	-4.23e-08	1.03e-08	0.99998
iDnase	Fetal Muscle Trunk	Muscle	Chronotype	27494321	0.0321215	0.0392989	0.407125	0.498097	0.229547	-4.06e-08	1.12e-08	0.999848
iDnase	HSMM cell derived Skeletal Muscle Myotubes Cells	Muscle	Chronotype	27494321	0.0312259	0.0423023	0.279156	0.378178	0.0595472	-2.93e-08	8.19e-09	0.999826
iDnase	HSMM Skeletal Muscle Myoblasts Cells	Muscle	Chronotype	27494321	0.0234046	0.0434461	0.233439	0.433335	0.079565	-3.01e-08	9.33e-09	0.999383
iDnase	Muscle Satellite Cultured Cells	Muscle	Chronotype	27494321	0.0437122	0.0439762	0.376282	0.378554	0.101674	-2.7e-08	8.47e-09	0.999267
iDnase	Psoas Muscle	Muscle	Chronotype	27494321	0.0316092	0.0456682	0.357099	0.515928	0.212227	-3.49e-08	1.16e-08	0.998698
iDnase	Skeletal Muscle Female	Muscle	Chronotype	27494321	0.030717	0.0424783	0.304628	0.421268	0.0979256	-3.98e-08	1.01e-08	0.999956
iDnase	Skeletal Muscle Male	Muscle	Chronotype	27494321	0.0415546	0.0400884	0.496839	0.479308	0.292033	-3.8e-08	1.09e-08	0.999761
iDnase	A549 EtOH 0.02pct Lung Carcinoma Cell Line	Other	Chronotype	27494321	0.0633287	0.0425	0.550248	0.369272	0.224394	-2.4e-08	8.79e-09	0.996846
iDnase	Fetal Kidney	Other	Chronotype	27494321	0.0793646	0.0473145	0.983922	0.586581	0.978147	-2.03e-08	1.21e-08	0.952642
iDnase	Fetal Lung	Other	Chronotype	27494321	0.0452249	0.0425558	0.5052	0.475384	0.295177	-3.57e-08	1.11e-08	0.999329
iDnase	HepG2 Hepatocellular Carcinoma Cell Line	Other	Chronotype	27494321	-0.00665802	0.0466061	-0.0674533	0.472174	0.0247616	-4.37e-08	1.15e-08	0.999925
iDnase	HUVEC Umbilical Vein Endothelial Primary Cells	Other	Chronotype	27494321	0.042315	0.0431572	0.41977	0.428125	0.178215	-2.62e-08	9.83e-09	0.996148
iDnase	Liver	Other	Chronotype	27494321	0.0792473	0.0383362	0.909707	0.440074	0.837316	-2.33e-08	1.1e-08	0.98298
iDnase	Lung	Other	Chronotype	27494321	0.039268	0.0400281	0.552498	0.563193	0.42754	-3.41e-08	1.37e-08	0.993434
iDnase	NHLF Lung Fibroblast Primary Cells	Other	Chronotype	27494321	0.00300286	0.043572	0.0335407	0.486682	0.0487083	-3.66e-08	1.07e-08	0.999687
iDnase	Ovary	Other	Chronotype	27494321	0.0280448	0.0438611	0.370722	0.579796	0.2779	-3.64e-08	1.25e-08	0.998231
iDnase	Pancreas	Other	Chronotype	27494321	0.00538367	0.040132	0.0879757	0.655806	0.166487	-4.45e-08	1.43e-08	0.99905
iDnase	Pancreatic Islets	Other	Chronotype	27494321	0.0817884	0.0440035	1.42158	0.764834	0.581089	-1.25e-08	1.64e-08	0.777437
iDnase	Placenta	Other	Chronotype	27494321	0.0357218	0.0388894	0.455377	0.495758	0.270775	-3.56e-08	1.08e-08	0.999489
iDnase	Placenta Amnion	Other	Chronotype	27494321	0.00819887	0.0484016	0.0831216	0.490704	0.0624117	-3.58e-08	1.06e-08	0.999633
iDnase	Colon Smooth Muscle	Sm. Muscle	Chronotype	27494321	0.00287966	0.0404797	0.0320765	0.450904	0.0305684	-5.06e-08	1.08e-08	0.999999
iDnase	Duodenum Smooth Muscle	Sm. Muscle	Chronotype	27494321	0.000708815	0.0448632	0.00724013	0.458252	0.0306606	-4.79e-08	1.17e-08	0.999978
iDnase	Rectal Smooth Muscle	Sm. Muscle	Chronotype	27494321	0.0294283	0.0380953	0.397086	0.514032	0.23964	-4.09e-08	1.26e-08	0.999401
iDnase	Stomach Smooth Muscle	Sm. Muscle	Chronotype	27494321	0.0563063	0.0393848	0.70944	0.496234	0.55682	-3.24e-08	1.16e-08	0.997468
iDnase	ES-I3 Cells	Stem-cells	Chronotype	27494321	0.0944971	0.0514821	1.03343	0.563012	0.952706	-1.59e-08	1.3e-08	0.889697
iDnase	ES-UCSF4 Cells	Stem-cells	Chronotype	27494321	0.151574	0.0463373	2.22733	0.680908	0.0761668	8.09e-09	1.61e-08	0.308186
iDnase	ES-WA7 Cells	Stem-cells	Chronotype	27494321	0.0869229	0.0520758	1.34972	0.80862	0.665566	-1.04e-08	1.67e-08	0.732718
iDnase	H1 BMP4 Derived Mesendoderm Cultured Cells	Stem-cells	Chronotype	27494321	0.0531518	0.0469717	0.784243	0.693058	0.755505	-2.58e-08	1.48e-08	0.959079
iDnase	H1 BMP4 Derived Trophoblast Cultured Cells	Stem-cells	Chronotype	27494321	-0.0152429	0.0461883	-0.173995	0.527229	0.0275414	-4.59e-08	1.16e-08	0.999959
iDnase	H1 Cells	Stem-cells	Chronotype	27494321	0.102052	0.046829	1.57165	0.721191	0.43006	-9.52e-09	1.6e-08	0.724462
iDnase	H1 Derived Mesenchymal Stem Cells	Stem-cells	Chronotype	27494321	0.0177686	0.041778	0.204447	0.4807	0.0992133	-3.28e-08	1.03e-08	0.999277
iDnase	H9 Cells	Stem-cells	Chronotype	27494321	0.0813328	0.0449189	1.41088	0.779211	0.598553	-1.41e-08	1.67e-08	0.799852
iDnase	hESC Derived CD184+ Endoderm Cultured Cells	Stem-cells	Chronotype	27494321	0.110557	0.053845	1.07231	0.522247	0.889967	-1.44e-08	1.22e-08	0.88071
iDnase	hESC Derived CD56+ Ectoderm Cultured Cells	Stem-cells	Chronotype	27494321	0.139408	0.0464309	2.10743	0.701895	0.117706	2.27e-09	1.55e-08	0.441796
iDnase	hESC Derived CD56+ Mesoderm Cultured Cells	Stem-cells	Chronotype	27494321	0.0433641	0.0490531	0.4175	0.472272	0.218386	-2.8e-08	1.1e-08	0.99454
iDnase	HUES48 Cells	Stem-cells	Chronotype	27494321	0.103051	0.0478689	1.32746	0.616628	0.595944	-1.28e-08	1.41e-08	0.81792
iDnase	HUES64 Cells	Stem-cells	Chronotype	27494321	0.085282	0.0478839	1.09276	0.613559	0.879979	-1.85e-08	1.35e-08	0.914796
iDnase	HUES6 Cells	Stem-cells	Chronotype	27494321	0.0928392	0.0502165	1.16148	0.628242	0.797297	-1.6e-08	1.45e-08	0.865115
iDnase	IMR90 fetal lung fibroblasts Cell Line	Stem-cells	Chronotype	27494321	0.0180188	0.039787	0.16859	0.37226	0.0266574	-3.4e-08	8.48e-09	0.999969
iDnase	iPS-15b Cells	Stem-cells	Chronotype	27494321	0.099324	0.0470848	1.39797	0.662712	0.549238	-1.29e-08	1.49e-08	0.808168
iDnase	iPS-18 Cells	Stem-cells	Chronotype	27494321	0.125296	0.0493866	1.65787	0.653467	0.315926	-4.4e-09	1.48e-08	0.61686
iDnase	iPS-20b Cells	Stem-cells	Chronotype	27494321	0.091813	0.0482612	1.25131	0.657749	0.702711	-1.52e-08	1.45e-08	0.851621
iDnase	iPS DF 19.11 Cells	Stem-cells	Chronotype	27494321	0.0531398	0.0451439	0.789677	0.670855	0.753652	-2.81e-08	1.52e-08	0.967423
iDnase	iPS DF 6.9 Cells	Stem-cells	Chronotype	27494321	0.0609068	0.04375	1.13582	0.815872	0.867846	-2.27e-08	1.75e-08	0.902479
iDnase	Brain Angular Gyrus	Brain	Sleep Duration	27494321	0.180176	0.0813521	2.00907	0.907126	0.270749	9.23e-09	1.14e-08	0.208813
iDnase	Brain Anterior Caudate	Brain	Sleep Duration	27494321	0.149775	0.0804975	1.62578	0.873785	0.476767	2.78e-09	1.14e-08	0.403244
iDnase	Brain Cingulate Gyrus	Brain	Sleep Duration	27494321	0.117767	0.0787935	1.28503	0.859766	0.740829	-2.68e-09	1.08e-08	0.59779
iDnase	Brain Dorsolateral Prefrontal Cortex	Brain	Sleep Duration	27494321	0.135789	0.0820504	1.56527	0.945814	0.551489	1.47e-09	1.24e-08	0.452849
iDnase	Brain Germinal Matrix	Brain	Sleep Duration	27494321	0.23023	0.074302	3.55029	1.14578	0.0297946	2.85e-08	1.3e-08	0.0139149
iDnase	Brain Hippocampus Middle	Brain	Sleep Duration	27494321	0.134421	0.0775052	1.31064	0.755697	0.681933	-2.7e-09	1e-08	0.606429
iDnase	Brain Inferior Temporal Lobe	Brain	Sleep Duration	27494321	0.165117	0.0798857	1.8361	0.888326	0.352136	6.57e-09	1.15e-08	0.284171
iDnase	Brain Substantia Nigra	Brain	Sleep Duration	27494321	0.0543656	0.0756519	0.597948	0.832069	0.626461	-1.43e-08	1.03e-08	0.917226
iDnase	Fetal Brain Female	Brain	Sleep Duration	27494321	0.275097	0.086492	2.84029	0.893001	0.042112	2.07e-08	1.05e-08	0.0241359
iDnase	Fetal Brain Male	Brain	Sleep Duration	27494321	0.169657	0.082043	2.06979	1.00091	0.292887	9.21e-09	1.21e-08	0.224041
iDnase	Cortex derived primary cultured neurospheres	Brain	Sleep Duration	27494321	0.164701	0.0794437	2.09447	1.01027	0.282052	8.21e-09	1.16e-08	0.238972
iDnase	Ganglion Eminence derived primary cultured neurospheres	Brain	Sleep Duration	27494321	0.125153	0.0782609	1.59888	0.999813	0.551046	1.45e-09	1.14e-08	0.44919
iDnase	NH-A Astrocytes Primary Cells	Brain	Sleep Duration	27494321	-0.049672	0.081243	-0.446335	0.73002	0.0454751	-2.62e-08	9.01e-09	0.998151
iDnase	H1 Derived Neuronal Progenitor Cultured Cells	Stem-cells	Sleep Duration	27494321	0.0449062	0.0724676	0.720306	1.1624	0.808915	-1.44e-08	1.3e-08	0.864856
iDnase	H9 Derived Neuronal Progenitor Cultured Cells	Stem-cells	Sleep Duration	27494321	0.204982	0.0774513	2.73836	1.03467	0.0944775	1.6e-08	1.34e-08	0.116812
iDnase	H9 Derived Neuron Cultured Cells	Stem-cells	Sleep Duration	27494321	0.195036	0.0800858	2.43942	1.00168	0.152363	1.12e-08	1.2e-08	0.174541
iDnase	Adipose Nuclei	Adipose	Sleep Duration	27494321	0.0461487	0.0727142	0.455336	0.717452	0.447763	-1.64e-08	9.43e-09	0.958654
iDnase	Fetal Adrenal Gland	Adrenal	Sleep Duration	27494321	-0.0186047	0.0714585	-0.206403	0.792771	0.125759	-2.88e-08	1.01e-08	0.997857
iDnase	Osteoblast Primary Cells	Bone	Sleep Duration	27494321	-0.0301413	0.0748527	-0.27469	0.682165	0.0616336	-2.35e-08	8.68e-09	0.996637
iDnase	Colonic Mucosa	Digestive	Sleep Duration	27494321	-0.0197249	0.0709498	-0.269584	0.969688	0.183608	-3.08e-08	1.22e-08	0.99432
iDnase	Duodenum Mucosa	Digestive	Sleep Duration	27494321	0.114587	0.066303	1.52092	0.880045	0.553287	-8.21e-10	1.15e-08	0.528488
iDnase	Esophagus	Digestive	Sleep Duration	27494321	-0.0190794	0.0593554	-0.274043	0.85254	0.13291	-2.96e-08	1.1e-08	0.996555
iDnase	Fetal Intestine Large	Digestive	Sleep Duration	27494321	0.0276784	0.0579194	0.390256	0.816644	0.454185	-2.06e-08	9.44e-09	0.98551
iDnase	Fetal Intestine Small	Digestive	Sleep Duration	27494321	0.0473159	0.0617773	0.570995	0.745512	0.563306	-1.7e-08	8.68e-09	0.974736
iDnase	Fetal Stomach	Digestive	Sleep Duration	27494321	-0.0378878	0.0718809	-0.415914	0.789074	0.0644943	-3.22e-08	9.81e-09	0.999482
iDnase	Gastric	Digestive	Sleep Duration	27494321	-0.0459865	0.0668412	-0.676666	0.983531	0.0823016	-3.63e-08	1.18e-08	0.998971
iDnase	Rectal Mucosa 1	Digestive	Sleep Duration	27494321	0.0773682	0.063766	1.05687	0.871062	0.947888	-8.6e-09	1.15e-08	0.772186
iDnase	Rectal Mucosa 2	Digestive	Sleep Duration	27494321	0.0271131	0.0598155	0.373802	0.824663	0.444776	-1.97e-08	9.93e-09	0.976647
iDnase	Sigmoid Colon	Digestive	Sleep Duration	27494321	0.0524179	0.0632694	0.742248	0.895908	0.77284	-1.41e-08	1.07e-08	0.905426
iDnase	Small Intestine	Digestive	Sleep Duration	27494321	0.0104646	0.0675512	0.142894	0.922416	0.350009	-2.37e-08	1.22e-08	0.974086
iDnase	Stomach Mucosa	Digestive	Sleep Duration	27494321	0.0471226	0.0623542	0.604523	0.799924	0.61982	-1.69e-08	1.02e-08	0.951028
iDnase	Breast Myoepithelial Primary Cells	Epithelial	Sleep Duration	27494321	0.000698441	0.0742263	0.00637275	0.677259	0.145663	-2.08e-08	8.95e-09	0.989807
iDnase	Breast variant Human Mammary Epithelial Cells (vHMEC)	Epithelial	Sleep Duration	27494321	0.0183722	0.0745939	0.162409	0.659405	0.204255	-1.65e-08	8.28e-09	0.977049
iDnase	Foreskin Fibroblast Primary Cells skin 1	Epithelial	Sleep Duration	27494321	-0.00757688	0.0737976	-0.0678711	0.661055	0.103877	-2.26e-08	8.9e-09	0.994437
iDnase	Foreskin Fibroblast Primary Cells skin 2	Epithelial	Sleep Duration	27494321	0.0173767	0.0729552	0.172659	0.724899	0.25191	-1.88e-08	9.31e-09	0.978176
iDnase	Foreskin Keratinocyte Primary Cells skin 1	Epithelial	Sleep Duration	27494321	0.0246138	0.0706629	0.263883	0.757571	0.334427	-1.64e-08	9.84e-09	0.952764
iDnase	Foreskin Keratinocyte Primary Cells skin 2	Epithelial	Sleep Duration	27494321	0.0708866	0.0698611	0.638575	0.629336	0.566328	-1.05e-08	8.17e-09	0.900988
iDnase	Foreskin Melanocyte Primary Cells skin 1	Epithelial	Sleep Duration	27494321	-0.0267716	0.0736926	-0.32658	0.898957	0.137818	-2.52e-08	1.1e-08	0.989069
iDnase	Foreskin Melanocyte Primary Cells skin 2	Epithelial	Sleep Duration	27494321	0.00994657	0.0827459	0.0826439	0.687518	0.182208	-1.93e-08	9.31e-09	0.980832
iDnase	HeLa-S3 Cervical Carcinoma Cell Line	Epithelial	Sleep Duration	27494321	0.00163351	0.0709533	0.0171586	0.7453	0.190969	-2.17e-08	9.96e-09	0.985507
iDnase	HMEC Mammary Epithelial Primary Cells	Epithelial	Sleep Duration	27494321	0.0780279	0.071904	0.827	0.762094	0.820736	-7.4e-09	9.56e-09	0.780419
iDnase	NHDF-Ad Adult Dermal Fibroblast Primary Cells	Epithelial	Sleep Duration	27494321	-0.0587705	0.074215	-0.664476	0.839096	0.0469943	-2.77e-08	9.82e-09	0.997596
iDnase	NHEK-Epidermal Keratinocyte Primary Cells	Epithelial	Sleep Duration	27494321	0.0970128	0.0702187	0.876151	0.634166	0.845512	-6.78e-09	8.22e-09	0.795304
iDnase	Aorta	Heart	Sleep Duration	27494321	-0.0549358	0.0672518	-0.775412	0.949251	0.059243	-3.33e-08	1.11e-08	0.99861
iDnase	Fetal Heart	Heart	Sleep Duration	27494321	-0.00986527	0.0831706	-0.0927181	0.781674	0.159784	-2.49e-08	1.07e-08	0.990113
iDnase	Left Ventricle	Heart	Sleep Duration	27494321	0.00227524	0.0665599	0.0288595	0.844255	0.242646	-2.51e-08	1.06e-08	0.990902
iDnase	Right Atrium	Heart	Sleep Duration	27494321	-0.0494288	0.0675974	-0.695186	0.950716	0.0670382	-3.68e-08	1.14e-08	0.99939
iDnase	Right Ventricle	Heart	Sleep Duration	27494321	-0.0890258	0.0776393	-0.951869	0.830124	0.0159065	-3.86e-08	1.09e-08	0.999794
iDnase	Dnd41 TCell Leukemia Cell Line	Immune	Sleep Duration	27494321	0.180812	0.0605332	2.44805	0.819571	0.0756804	1.78e-08	1.06e-08	0.046187
iDnase	Fetal Thymus	Immune	Sleep Duration	27494321	0.171419	0.0542209	2.50911	0.793649	0.0573446	2.2e-08	1.05e-08	0.017833
iDnase	GM12878 Lymphoblastoid Cells	Immune	Sleep Duration	27494321	0.187563	0.0527306	2.89074	0.812687	0.0213871	2.52e-08	1.14e-08	0.0132953
iDnase	K562 Leukemia Cells	Immune	Sleep Duration	27494321	0.119702	0.0679255	1.44216	0.818365	0.58867	-8.55e-10	1.2e-08	0.528492
iDnase	Monocytes-CD14+ RO01746 Primary Cells	Immune	Sleep Duration	27494321	0.162133	0.0533735	1.92165	0.632598	0.144368	1.19e-08	8.48e-09	0.08019
iDnase	Primary B cells from cord blood	Immune	Sleep Duration	27494321	0.150896	0.0533164	2.60372	0.91998	0.0835101	2.31e-08	1.19e-08	0.0260712
iDnase	Primary B cells from peripheral blood	Immune	Sleep Duration	27494321	0.203841	0.0542732	3.24933	0.865143	0.0101239	3.44e-08	1.19e-08	0.00190199
iDnase	Primary hematopoietic stem cells	Immune	Sleep Duration	27494321	0.190626	0.0578868	3.49735	1.06203	0.0180554	3.45e-08	1.38e-08	0.00631332
iDnase	Primary hematopoietic stem cells G-CSF-mobilized Female	Immune	Sleep Duration	27494321	0.215318	0.0598521	2.83627	0.788401	0.0201023	2.53e-08	1.16e-08	0.0144952
iDnase	Primary hematopoietic stem cells G-CSF-mobilized Male	Immune	Sleep Duration	27494321	0.198986	0.058913	2.3963	0.709463	0.0472992	1.78e-08	1.05e-08	0.0446825
iDnase	Primary hematopoietic stem cells short term culture	Immune	Sleep Duration	27494321	0.180639	0.0579505	2.6594	0.85316	0.0513341	2.2e-08	1.19e-08	0.0321301
iDnase	Primary monocytes from peripheral blood	Immune	Sleep Duration	27494321	0.162747	0.0530337	2.45326	0.799431	0.0695887	2.11e-08	1.05e-08	0.0219987
iDnase	Primary mononuclear cells from peripheral blood	Immune	Sleep Duration	27494321	0.106439	0.061174	1.33446	0.766958	0.662596	6.86e-10	1.03e-08	0.473532
iDnase	Primary Natural Killer cells from peripheral blood	Immune	Sleep Duration	27494321	0.175739	0.0520342	2.84019	0.840948	0.0288751	2.9e-08	1.12e-08	0.00478447
iDnase	Primary neutrophils from peripheral blood	Immune	Sleep Duration	27494321	0.143238	0.0512934	2.15741	0.772568	0.133993	1.55e-08	9.22e-09	0.0463112
iDnase	Primary T CD8+ memory cells from peripheral blood	Immune	Sleep Duration	27494321	0.156768	0.0548595	2.74375	0.960154	0.0665487	2.38e-08	1.23e-08	0.0260851
iDnase	Primary T CD8+ naive cells from peripheral blood	Immune	Sleep Duration	27494321	0.163273	0.0561871	2.89778	0.99721	0.0540571	2.79e-08	1.29e-08	0.0151679
iDnase	Primary T cells effector/memory enriched from peripheral blood	Immune	Sleep Duration	27494321	0.151732	0.0544313	2.88187	1.03382	0.0669442	2.79e-08	1.3e-08	0.0162484
iDnase	Primary T cells from cord blood	Immune	Sleep Duration	27494321	0.150788	0.0551938	3.05713	1.11902	0.0637739	2.92e-08	1.38e-08	0.0172421
iDnase	Primary T cells from peripheral blood	Immune	Sleep Duration	27494321	0.188408	0.0551147	3.09957	0.906711	0.0188532	3.23e-08	1.17e-08	0.00288036
iDnase	Primary T helper 17 cells PMA-I stimulated	Immune	Sleep Duration	27494321	0.172056	0.0582639	2.75668	0.933507	0.0560804	2.49e-08	1.21e-08	0.0199127
iDnase	Primary T helper cells from peripheral blood	Immune	Sleep Duration	27494321	0.171046	0.0546626	2.77145	0.885692	0.0432693	2.64e-08	1.17e-08	0.0118784
iDnase	Primary T helper cells PMA-I stimulated	Immune	Sleep Duration	27494321	0.158795	0.0528256	2.30627	0.767219	0.0845299	1.84e-08	9.91e-09	0.0314123
iDnase	Primary T helper memory cells from peripheral blood 1	Immune	Sleep Duration	27494321	0.165963	0.0547125	2.96837	0.978571	0.041018	2.91e-08	1.22e-08	0.00862463
iDnase	Primary T helper memory cells from peripheral blood 2	Immune	Sleep Duration	27494321	0.174999	0.0571801	2.74909	0.898251	0.0483284	2.42e-08	1.17e-08	0.0191676
iDnase	Primary T helper naive cells from peripheral blood 1	Immune	Sleep Duration	27494321	0.171821	0.0568229	2.94586	0.974224	0.0433077	2.83e-08	1.24e-08	0.0115067
iDnase	Primary T helper naive cells from peripheral blood 2	Immune	Sleep Duration	27494321	0.150774	0.0549632	2.51241	0.915879	0.0937607	2.1e-08	1.19e-08	0.0386305
iDnase	Primary T regulatory cells from peripheral blood	Immune	Sleep Duration	27494321	0.176719	0.0528133	3.02873	0.905151	0.0225957	3.17e-08	1.15e-08	0.00294887
iDnase	Spleen	Immune	Sleep Duration	27494321	0.061347	0.0607824	0.870202	0.862193	0.88008	-1.1e-08	1.17e-08	0.826001
iDnase	Thymus	Immune	Sleep Duration	27494321	0.122988	0.0553247	2.17587	0.978792	0.227522	1.45e-08	1.25e-08	0.122798
iDnase	Adipose Derived Mesenchymal Stem Cell Cultured Cells	Mesench	Sleep Duration	27494321	-0.0254935	0.0831292	-0.193213	0.630028	0.0582429	-2.41e-08	8.65e-09	0.997318
iDnase	Bone Marrow Derived Cultured Mesenchymal Stem Cells	Mesench	Sleep Duration	27494321	-0.0455749	0.078564	-0.405296	0.698667	0.0442656	-2.54e-08	8.97e-09	0.997728
iDnase	Mesenchymal Stem Cell Derived Adipocyte Cultured Cells	Mesench	Sleep Duration	27494321	-0.0177557	0.0859653	-0.139711	0.676419	0.0926203	-2.31e-08	9.33e-09	0.993401
iDnase	Mesenchymal Stem Cell Derived Chondrocyte Cultured Cells	Mesench	Sleep Duration	27494321	-0.0820514	0.0821402	-0.683497	0.684237	0.0144746	-3.16e-08	9.3e-09	0.99966
iDnase	Fetal Muscle Leg	Muscle	Sleep Duration	27494321	-0.0188261	0.0707925	-0.224353	0.843643	0.142144	-2.79e-08	1.05e-08	0.996086
iDnase	Fetal Muscle Trunk	Muscle	Sleep Duration	27494321	-0.0387037	0.0706305	-0.490553	0.89521	0.086248	-3.31e-08	1.08e-08	0.998914
iDnase	HSMM cell derived Skeletal Muscle Myotubes Cells	Muscle	Sleep Duration	27494321	-0.0337475	0.0799027	-0.301699	0.714321	0.0668209	-2.33e-08	8.66e-09	0.996437
iDnase	HSMM Skeletal Muscle Myoblasts Cells	Muscle	Sleep Duration	27494321	0.0217659	0.0749018	0.217095	0.747077	0.29195	-1.56e-08	8.98e-09	0.958424
iDnase	Muscle Satellite Cultured Cells	Muscle	Sleep Duration	27494321	-0.0253225	0.0782699	-0.217981	0.673761	0.069518	-2.3e-08	8.57e-09	0.9964
iDnase	Psoas Muscle	Muscle	Sleep Duration	27494321	-0.0391963	0.0761164	-0.442812	0.85991	0.0895853	-2.99e-08	1.09e-08	0.997028
iDnase	Skeletal Muscle Female	Muscle	Sleep Duration	27494321	0.0360383	0.0708759	0.357401	0.702894	0.354822	-1.8e-08	9.3e-09	0.973544
iDnase	Skeletal Muscle Male	Muscle	Sleep Duration	27494321	-0.0074384	0.0669837	-0.0889356	0.800876	0.168756	-2.59e-08	1.03e-08	0.993974
iDnase	A549 EtOH 0.02pct Lung Carcinoma Cell Line	Other	Sleep Duration	27494321	0.0391853	0.0670894	0.340471	0.582923	0.261046	-1.71e-08	7.48e-09	0.988724
iDnase	Fetal Kidney	Other	Sleep Duration	27494321	-0.0539022	0.0840744	-0.668253	1.04231	0.105239	-3.05e-08	1.24e-08	0.992986
iDnase	Fetal Lung	Other	Sleep Duration	27494321	-0.0426311	0.0777357	-0.476225	0.868373	0.0862734	-3.29e-08	1.13e-08	0.998209
iDnase	HepG2 Hepatocellular Carcinoma Cell Line	Other	Sleep Duration	27494321	-0.0129132	0.0747952	-0.130826	0.757761	0.134299	-2.79e-08	1.04e-08	0.996311
iDnase	HUVEC Umbilical Vein Endothelial Primary Cells	Other	Sleep Duration	27494321	-0.0207294	0.0721576	-0.205638	0.715812	0.0931245	-2.45e-08	9.17e-09	0.996174
iDnase	Liver	Other	Sleep Duration	27494321	0.0982587	0.0593987	1.12794	0.681858	0.850892	-7.14e-09	9.41e-09	0.775966
iDnase	Lung	Other	Sleep Duration	27494321	-0.00959004	0.0649699	-0.134931	0.914123	0.210349	-2.9e-08	1.17e-08	0.993358
iDnase	NHLF Lung Fibroblast Primary Cells	Other	Sleep Duration	27494321	-0.0575704	0.0755178	-0.643038	0.843503	0.0488209	-2.85e-08	1.03e-08	0.997186
iDnase	Ovary	Other	Sleep Duration	27494321	-0.00381245	0.0741985	-0.0503964	0.980824	0.279923	-2.36e-08	1.19e-08	0.976237
iDnase	Pancreas	Other	Sleep Duration	27494321	-0.0303636	0.0644168	-0.496178	1.05265	0.150675	-3.29e-08	1.25e-08	0.995877
iDnase	Pancreatic Islets	Other	Sleep Duration	27494321	0.096858	0.0726891	1.68351	1.26343	0.586765	1.42e-09	1.45e-08	0.46094
iDnase	Placenta	Other	Sleep Duration	27494321	0.0308263	0.060831	0.392971	0.775467	0.431732	-1.98e-08	9.47e-09	0.981516
iDnase	Placenta Amnion	Other	Sleep Duration	27494321	-0.0252105	0.0684322	-0.255588	0.693778	0.0705841	-2.56e-08	9.12e-09	0.997488
iDnase	Colon Smooth Muscle	Sm. Muscle	Sleep Duration	27494321	-0.00800945	0.0720465	-0.0892173	0.802527	0.171289	-2.61e-08	1.01e-08	0.995268
iDnase	Duodenum Smooth Muscle	Sm. Muscle	Sleep Duration	27494321	0.049501	0.0801605	0.505624	0.818793	0.544566	-1.63e-08	1.14e-08	0.92302
iDnase	Rectal Smooth Muscle	Sm. Muscle	Sleep Duration	27494321	0.0205615	0.0689555	0.277443	0.930438	0.434861	-2e-08	1.15e-08	0.958944
iDnase	Stomach Smooth Muscle	Sm. Muscle	Sleep Duration	27494321	-0.0212959	0.0672658	-0.268321	0.847525	0.128278	-2.95e-08	1.06e-08	0.99727
iDnase	ES-I3 Cells	Stem-cells	Sleep Duration	27494321	0.149982	0.0825842	1.64021	0.903147	0.47559	-1.29e-09	1.19e-08	0.543199
iDnase	ES-UCSF4 Cells	Stem-cells	Sleep Duration	27494321	0.169812	0.0696583	2.49532	1.0236	0.144005	9.53e-09	1.3e-08	0.231062
iDnase	ES-WA7 Cells	Stem-cells	Sleep Duration	27494321	0.170787	0.0754344	2.65194	1.17133	0.157844	1.47e-08	1.4e-08	0.146572
iDnase	H1 BMP4 Derived Mesendoderm Cultured Cells	Stem-cells	Sleep Duration	27494321	0.156967	0.0731598	2.31601	1.07946	0.219995	8.36e-09	1.3e-08	0.260708
iDnase	H1 BMP4 Derived Trophoblast Cultured Cells	Stem-cells	Sleep Duration	27494321	-0.0330538	0.068176	-0.377301	0.778214	0.0766561	-3.06e-08	9.45e-09	0.999388
iDnase	H1 Cells	Stem-cells	Sleep Duration	27494321	0.140353	0.072371	2.16152	1.11455	0.295686	5.16e-09	1.32e-08	0.348274
iDnase	H1 Derived Mesenchymal Stem Cells	Stem-cells	Sleep Duration	27494321	-0.0488207	0.0748555	-0.561733	0.861292	0.0695169	-2.92e-08	1.05e-08	0.997287
iDnase	H9 Cells	Stem-cells	Sleep Duration	27494321	0.175669	0.0715684	3.04734	1.2415	0.0963135	1.82e-08	1.46e-08	0.10603
iDnase	hESC Derived CD184+ Endoderm Cultured Cells	Stem-cells	Sleep Duration	27494321	0.122743	0.087227	1.19049	0.846022	0.821461	-6.78e-09	1.14e-08	0.724737
iDnase	hESC Derived CD56+ Ectoderm Cultured Cells	Stem-cells	Sleep Duration	27494321	0.142307	0.0723169	2.15125	1.09321	0.292902	5.2e-09	1.36e-08	0.351193
iDnase	hESC Derived CD56+ Mesoderm Cultured Cells	Stem-cells	Sleep Duration	27494321	0.0436301	0.0796195	0.420061	0.766559	0.44761	-1.61e-08	9.36e-09	0.957336
iDnase	HUES48 Cells	Stem-cells	Sleep Duration	27494321	0.204622	0.0762688	2.63585	0.982463	0.0913284	1.26e-08	1.19e-08	0.144592
iDnase	HUES64 Cells	Stem-cells	Sleep Duration	27494321	0.195078	0.081441	2.49962	1.04354	0.146193	1.06e-08	1.3e-08	0.206906
iDnase	HUES6 Cells	Stem-cells	Sleep Duration	27494321	0.205039	0.0763349	2.56518	0.955002	0.0997011	1.22e-08	1.22e-08	0.159584
iDnase	IMR90 fetal lung fibroblasts Cell Line	Stem-cells	Sleep Duration	27494321	-0.0427113	0.07685	-0.399621	0.719034	0.0499031	-2.69e-08	9.09e-09	0.998447
iDnase	iPS-15b Cells	Stem-cells	Sleep Duration	27494321	0.160597	0.0742088	2.26038	1.04448	0.223738	6.35e-09	1.29e-08	0.31147
iDnase	iPS-18 Cells	Stem-cells	Sleep Duration	27494321	0.22913	0.0785167	3.03178	1.03891	0.0497541	1.89e-08	1.3e-08	0.0730001
iDnase	iPS-20b Cells	Stem-cells	Sleep Duration	27494321	0.212838	0.0770315	2.90075	1.04986	0.0674651	1.7e-08	1.28e-08	0.0913143
iDnase	iPS DF 19.11 Cells	Stem-cells	Sleep Duration	27494321	0.106424	0.0701201	1.58149	1.04201	0.5758	-2.63e-09	1.32e-08	0.578638
iDnase	iPS DF 6.9 Cells	Stem-cells	Sleep Duration	27494321	0.148463	0.0700591	2.7686	1.3065	0.175446	1.48e-08	1.56e-08	0.172651
iDnase	Brain Angular Gyrus	Brain	BMI	25673413	0.254182	0.0307908	2.83428	0.343336	3.45e-08	2.61e-08	1.34e-08	0.0260887
iDnase	Brain Anterior Caudate	Brain	BMI	25673413	0.244208	0.028771	2.65083	0.312303	9.92e-08	2.05e-08	1.35e-08	0.0645766
iDnase	Brain Cingulate Gyrus	Brain	BMI	25673413	0.235311	0.0280893	2.56763	0.306501	2.08e-07	1.63e-08	1.3e-08	0.105235
iDnase	Brain Dorsolateral Prefrontal Cortex	Brain	BMI	25673413	0.224624	0.0256226	2.58929	0.295357	2.98e-07	1.7e-08	1.21e-08	0.0799253
iDnase	Brain Germinal Matrix	Brain	BMI	25673413	0.225688	0.0379191	3.48024	0.584735	3.35e-06	3.76e-08	1.61e-08	0.00985357
iDnase	Brain Hippocampus Middle	Brain	BMI	25673413	0.262044	0.0303566	2.55501	0.295985	9.21e-07	2.01e-08	1.52e-08	0.0938631
iDnase	Brain Inferior Temporal Lobe	Brain	BMI	25673413	0.247717	0.0283168	2.75461	0.314881	1.13e-08	2.37e-08	1.26e-08	0.0294677
iDnase	Brain Substantia Nigra	Brain	BMI	25673413	0.200788	0.0274797	2.2084	0.30224	4.17e-05	2.66e-09	1.3e-08	0.418859
iDnase	Fetal Brain Female	Brain	BMI	25673413	0.223044	0.036652	2.30285	0.37842	0.000128272	7.66e-09	1.26e-08	0.271184
iDnase	Fetal Brain Male	Brain	BMI	25673413	0.212874	0.0301318	2.59702	0.367602	2.93e-06	1.51e-08	1.13e-08	0.091998
iDnase	Cortex derived primary cultured neurospheres	Brain	BMI	25673413	0.218682	0.0360613	2.78092	0.458583	1.76e-05	1.8e-08	1.37e-08	0.094102
iDnase	Ganglion Eminence derived primary cultured neurospheres	Brain	BMI	25673413	0.228905	0.0400446	2.92435	0.511585	2.66e-05	2.31e-08	1.53e-08	0.0655752
iDnase	NH-A Astrocytes Primary Cells	Brain	BMI	25673413	0.111868	0.0367066	1.0052	0.329832	0.987286	-2.97e-08	1.23e-08	0.992318
iDnase	H1 Derived Neuronal Progenitor Cultured Cells	Stem-cells	BMI	25673413	0.1756	0.0373477	2.81667	0.599066	0.00199889	1.58e-08	2.14e-08	0.229331
iDnase	H9 Derived Neuronal Progenitor Cultured Cells	Stem-cells	BMI	25673413	0.209637	0.0347001	2.80055	0.463559	1.93e-05	1.94e-08	1.61e-08	0.114344
iDnase	H9 Derived Neuron Cultured Cells	Stem-cells	BMI	25673413	0.280177	0.0309527	3.50433	0.387142	7.77e-10	4.46e-08	1.52e-08	0.00167944
iDnase	Adipose Nuclei	Adipose	BMI	25673413	0.139542	0.0255699	1.37682	0.252291	0.124035	-2.5e-08	8.75e-09	0.997846
iDnase	Fetal Adrenal Gland	Adrenal	BMI	25673413	0.159052	0.0237691	1.76454	0.263697	0.00319368	-1.27e-08	8.05e-09	0.942149
iDnase	Osteoblast Primary Cells	Bone	BMI	25673413	0.116548	0.0335703	1.06216	0.305941	0.838435	-2.67e-08	1.05e-08	0.994588
iDnase	Colonic Mucosa	Digestive	BMI	25673413	0.104678	0.023724	1.43067	0.324242	0.180091	-3.03e-08	1.06e-08	0.997807
iDnase	Duodenum Mucosa	Digestive	BMI	25673413	0.130251	0.0229813	1.72883	0.305033	0.0208615	-1.41e-08	1.04e-08	0.911645
iDnase	Esophagus	Digestive	BMI	25673413	0.0989551	0.022879	1.42132	0.328618	0.201476	-2.75e-08	1.16e-08	0.991065
iDnase	Fetal Intestine Large	Digestive	BMI	25673413	0.12376	0.0205971	1.74497	0.290412	0.0127413	-1.6e-08	9.32e-09	0.956758
iDnase	Fetal Intestine Small	Digestive	BMI	25673413	0.124338	0.0222749	1.50047	0.268808	0.0663477	-2.23e-08	8.36e-09	0.996143
iDnase	Fetal Stomach	Digestive	BMI	25673413	0.137543	0.0250678	1.50988	0.275182	0.0598943	-2.4e-08	1.07e-08	0.987361
iDnase	Gastric	Digestive	BMI	25673413	0.107166	0.022336	1.57689	0.328661	0.0834399	-2.38e-08	1.17e-08	0.979027
iDnase	Rectal Mucosa 1	Digestive	BMI	25673413	0.120186	0.0217867	1.64178	0.297612	0.0367151	-1.97e-08	1.11e-08	0.962969
iDnase	Rectal Mucosa 2	Digestive	BMI	25673413	0.100723	0.0198473	1.38864	0.27363	0.157496	-2.87e-08	9.53e-09	0.998695
iDnase	Sigmoid Colon	Digestive	BMI	25673413	0.0887006	0.0195904	1.25602	0.277405	0.357227	-3.58e-08	1.03e-08	0.999735
iDnase	Small Intestine	Digestive	BMI	25673413	0.0910188	0.0232496	1.24287	0.317474	0.441096	-3.48e-08	1.29e-08	0.996504
iDnase	Stomach Mucosa	Digestive	BMI	25673413	0.130146	0.0210817	1.66961	0.270451	0.0143191	-1.67e-08	9.84e-09	0.955363
iDnase	Breast Myoepithelial Primary Cells	Epithelial	BMI	25673413	0.176623	0.038393	1.61156	0.350307	0.0745869	-9.55e-09	1.4e-08	0.752773
iDnase	Breast variant Human Mammary Epithelial Cells (vHMEC)	Epithelial	BMI	25673413	0.131918	0.0470671	1.16615	0.41607	0.682546	-2.1e-08	1.59e-08	0.906438
iDnase	Foreskin Fibroblast Primary Cells skin 1	Epithelial	BMI	25673413	0.148633	0.0256512	1.33141	0.229775	0.150464	-1.95e-08	8.3e-09	0.990465
iDnase	Foreskin Fibroblast Primary Cells skin 2	Epithelial	BMI	25673413	0.129724	0.0256252	1.28897	0.254618	0.248992	-2.32e-08	9.97e-09	0.990057
iDnase	Foreskin Keratinocyte Primary Cells skin 1	Epithelial	BMI	25673413	0.107067	0.0315669	1.14785	0.338426	0.658025	-2.67e-08	1.36e-08	0.975448
iDnase	Foreskin Keratinocyte Primary Cells skin 2	Epithelial	BMI	25673413	0.194888	0.0361857	1.75563	0.325975	0.0220849	-1.45e-09	1.22e-08	0.547044
iDnase	Foreskin Melanocyte Primary Cells skin 1	Epithelial	BMI	25673413	0.112591	0.024955	1.37346	0.30442	0.212159	-2.23e-08	1.16e-08	0.972722
iDnase	Foreskin Melanocyte Primary Cells skin 2	Epithelial	BMI	25673413	0.154836	0.0373688	1.2865	0.31049	0.346441	-2.01e-08	1.3e-08	0.938809
iDnase	HeLa-S3 Cervical Carcinoma Cell Line	Epithelial	BMI	25673413	0.148091	0.0372766	1.55557	0.391556	0.155021	-1.11e-08	1.35e-08	0.794726
iDnase	HMEC Mammary Epithelial Primary Cells	Epithelial	BMI	25673413	0.109054	0.0360387	1.15583	0.381965	0.67902	-2.29e-08	1.33e-08	0.957983
iDnase	NHDF-Ad Adult Dermal Fibroblast Primary Cells	Epithelial	BMI	25673413	0.0604138	0.0346274	0.683055	0.391507	0.422994	-4.05e-08	1.41e-08	0.997926
iDnase	NHEK-Epidermal Keratinocyte Primary Cells	Epithelial	BMI	25673413	0.164595	0.0411153	1.4865	0.371324	0.188464	-1.01e-08	1.39e-08	0.76591
iDnase	Aorta	Heart	BMI	25673413	0.0646533	0.0239934	0.912573	0.338665	0.796673	-4.31e-08	1.23e-08	0.999763
iDnase	Fetal Heart	Heart	BMI	25673413	0.152603	0.0309419	1.43423	0.290806	0.14082	-2.08e-08	1.22e-08	0.955183
iDnase	Left Ventricle	Heart	BMI	25673413	0.107395	0.0221901	1.36221	0.281462	0.198691	-3.01e-08	1.06e-08	0.997797
iDnase	Right Atrium	Heart	BMI	25673413	0.105182	0.0210036	1.47932	0.295402	0.0950763	-2.82e-08	9.95e-09	0.997721
iDnase	Right Ventricle	Heart	BMI	25673413	0.124909	0.0305902	1.33554	0.327072	0.298457	-2.67e-08	1.47e-08	0.965743
iDnase	Dnd41 TCell Leukemia Cell Line	Immune	BMI	25673413	0.172949	0.0271172	2.3416	0.367145	0.000446793	1.55e-08	1.57e-08	0.161181
iDnase	Fetal Thymus	Immune	BMI	25673413	0.119328	0.0234347	1.74665	0.343022	0.0287501	-9.52e-09	1.13e-08	0.799669
iDnase	GM12878 Lymphoblastoid Cells	Immune	BMI	25673413	0.103538	0.0223035	1.59574	0.343742	0.0846219	-1.85e-08	1.27e-08	0.928022
iDnase	K562 Leukemia Cells	Immune	BMI	25673413	0.153066	0.0249873	1.84413	0.301047	0.00588059	-4.63e-09	1.02e-08	0.675613
iDnase	Monocytes-CD14+ RO01746 Primary Cells	Immune	BMI	25673413	0.151205	0.0223009	1.79213	0.264317	0.00228694	2.86e-10	7.68e-09	0.48513
iDnase	Primary B cells from cord blood	Immune	BMI	25673413	0.124045	0.0223763	2.14041	0.386106	0.00373495	6.87e-09	1.21e-08	0.285334
iDnase	Primary B cells from peripheral blood	Immune	BMI	25673413	0.121258	0.0231984	1.93291	0.369794	0.0126727	-3.12e-10	1.18e-08	0.510573
iDnase	Primary hematopoietic stem cells	Immune	BMI	25673413	0.131159	0.025216	2.40634	0.46263	0.00192026	1.33e-08	1.51e-08	0.190702
iDnase	Primary hematopoietic stem cells G-CSF-mobilized Female	Immune	BMI	25673413	0.167122	0.0269455	2.20141	0.354939	0.000913076	1.06e-08	1.35e-08	0.21726
iDnase	Primary hematopoietic stem cells G-CSF-mobilized Male	Immune	BMI	25673413	0.19576	0.0264877	2.35745	0.31898	5.77e-05	1.97e-08	1.22e-08	0.0534323
iDnase	Primary hematopoietic stem cells short term culture	Immune	BMI	25673413	0.15401	0.0303322	2.26738	0.446558	0.00392263	1.2e-08	1.66e-08	0.236026
iDnase	Primary monocytes from peripheral blood	Immune	BMI	25673413	0.128074	0.0203821	1.93059	0.307241	0.00217094	3.29e-09	9.32e-09	0.362161
iDnase	Primary mononuclear cells from peripheral blood	Immune	BMI	25673413	0.129505	0.0256299	1.62364	0.32133	0.0488515	-1.16e-08	1.27e-08	0.820245
iDnase	Primary Natural Killer cells from peripheral blood	Immune	BMI	25673413	0.12015	0.022813	1.94179	0.36869	0.0123411	1.47e-09	1.23e-08	0.452652
iDnase	Primary neutrophils from peripheral blood	Immune	BMI	25673413	0.126824	0.020564	1.91019	0.30973	0.00267714	3.87e-09	8.86e-09	0.331124
iDnase	Primary T CD8+ memory cells from peripheral blood	Immune	BMI	25673413	0.105527	0.0210328	1.84695	0.368116	0.023638	-8.28e-09	1.22e-08	0.750812
iDnase	Primary T CD8+ naive cells from peripheral blood	Immune	BMI	25673413	0.100729	0.0222901	1.78775	0.395605	0.0496832	-8.66e-09	1.27e-08	0.752165
iDnase	Primary T cells effector/memory enriched from peripheral blood	Immune	BMI	25673413	0.0995798	0.0223929	1.89134	0.425312	0.0405474	-6.25e-09	1.46e-08	0.66628
iDnase	Primary T cells from cord blood	Immune	BMI	25673413	0.111733	0.0221341	2.26532	0.448755	0.00601281	6.81e-09	1.36e-08	0.308488
iDnase	Primary T cells from peripheral blood	Immune	BMI	25673413	0.108433	0.0222538	1.78387	0.366105	0.0343218	-1.12e-08	1.15e-08	0.834896
iDnase	Primary T helper 17 cells PMA-I stimulated	Immune	BMI	25673413	0.100747	0.022149	1.61417	0.354871	0.0857053	-1.54e-08	1.09e-08	0.921685
iDnase	Primary T helper cells from peripheral blood	Immune	BMI	25673413	0.112673	0.0229343	1.82563	0.371602	0.0287908	-6.24e-09	1.16e-08	0.70483
iDnase	Primary T helper cells PMA-I stimulated	Immune	BMI	25673413	0.107298	0.020781	1.55836	0.301815	0.0650095	-1.52e-08	9.54e-09	0.943839
iDnase	Primary T helper memory cells from peripheral blood 1	Immune	BMI	25673413	0.0992634	0.0222567	1.77539	0.398075	0.0546645	-9.25e-09	1.28e-08	0.765104
iDnase	Primary T helper memory cells from peripheral blood 2	Immune	BMI	25673413	0.1134	0.0218758	1.78143	0.343651	0.0248833	-9e-09	1.11e-08	0.79209
iDnase	Primary T helper naive cells from peripheral blood 1	Immune	BMI	25673413	0.0969035	0.0218426	1.6614	0.374488	0.0794974	-1.39e-08	1.17e-08	0.88231
iDnase	Primary T helper naive cells from peripheral blood 2	Immune	BMI	25673413	0.10446	0.021485	1.74066	0.358014	0.0408142	-1.15e-08	1.07e-08	0.858469
iDnase	Primary T regulatory cells from peripheral blood	Immune	BMI	25673413	0.101959	0.0209659	1.74745	0.359328	0.0385358	-8.24e-09	1.18e-08	0.758389
iDnase	Spleen	Immune	BMI	25673413	0.109926	0.022196	1.55929	0.314848	0.0715769	-2.36e-08	9.96e-09	0.990949
iDnase	Thymus	Immune	BMI	25673413	0.110839	0.0220773	1.96093	0.390585	0.0140976	-5.01e-09	1.34e-08	0.645763
iDnase	Adipose Derived Mesenchymal Stem Cell Cultured Cells	Mesench	BMI	25673413	0.162275	0.0315707	1.22987	0.239271	0.338204	-2.01e-08	9.81e-09	0.979963
iDnase	Bone Marrow Derived Cultured Mesenchymal Stem Cells	Mesench	BMI	25673413	0.0988775	0.0359601	0.879315	0.319792	0.706303	-3.38e-08	1.04e-08	0.999423
iDnase	Mesenchymal Stem Cell Derived Adipocyte Cultured Cells	Mesench	BMI	25673413	0.140687	0.0315359	1.107	0.248141	0.664364	-2.59e-08	1.05e-08	0.993158
iDnase	Mesenchymal Stem Cell Derived Chondrocyte Cultured Cells	Mesench	BMI	25673413	0.135991	0.0342141	1.13282	0.285007	0.638399	-2.63e-08	9.48e-09	0.997199
iDnase	Fetal Muscle Leg	Muscle	BMI	25673413	0.140505	0.0251492	1.67442	0.299706	0.0212779	-1.8e-08	9.61e-09	0.96949
iDnase	Fetal Muscle Trunk	Muscle	BMI	25673413	0.184023	0.034879	2.33241	0.442076	0.00490175	6.76e-09	1.7e-08	0.345501
iDnase	HSMM cell derived Skeletal Muscle Myotubes Cells	Muscle	BMI	25673413	0.109061	0.0441906	0.974989	0.395059	0.948627	-3.07e-08	1.42e-08	0.984425
iDnase	HSMM Skeletal Muscle Myoblasts Cells	Muscle	BMI	25673413	0.141707	0.0294469	1.4134	0.293706	0.150625	-1.53e-08	9.83e-09	0.940715
iDnase	Muscle Satellite Cultured Cells	Muscle	BMI	25673413	0.109003	0.0417199	0.938317	0.359132	0.86206	-3.19e-08	1.37e-08	0.990022
iDnase	Psoas Muscle	Muscle	BMI	25673413	0.102909	0.0228318	1.16259	0.257937	0.526639	-3.31e-08	9.17e-09	0.999846
iDnase	Skeletal Muscle Female	Muscle	BMI	25673413	0.145405	0.0251029	1.44202	0.248952	0.0607996	-2.22e-08	9.22e-09	0.991885
iDnase	Skeletal Muscle Male	Muscle	BMI	25673413	0.133721	0.0224879	1.59881	0.268872	0.0199171	-2.1e-08	8.83e-09	0.991361
iDnase	A549 EtOH 0.02pct Lung Carcinoma Cell Line	Other	BMI	25673413	0.190313	0.0400175	1.65358	0.347702	0.0585179	-3.99e-09	1.28e-08	0.622015
iDnase	Fetal Kidney	Other	BMI	25673413	0.06726	0.0352475	0.833856	0.436981	0.702038	-4.58e-08	1.67e-08	0.996899
iDnase	Fetal Lung	Other	BMI	25673413	0.123122	0.0264616	1.37537	0.295598	0.193608	-2.96e-08	1.26e-08	0.990521
iDnase	HepG2 Hepatocellular Carcinoma Cell Line	Other	BMI	25673413	0.124877	0.0306814	1.26515	0.310838	0.386797	-2.58e-08	1.24e-08	0.980991
iDnase	HUVEC Umbilical Vein Endothelial Primary Cells	Other	BMI	25673413	0.0708335	0.028253	0.702677	0.280273	0.298506	-4.42e-08	1.14e-08	0.999945
iDnase	Liver	Other	BMI	25673413	0.147937	0.0237896	1.69822	0.273089	0.00762927	-1.4e-08	1.13e-08	0.893265
iDnase	Lung	Other	BMI	25673413	0.094479	0.0207921	1.32931	0.292544	0.251849	-3.44e-08	1.02e-08	0.999622
iDnase	NHLF Lung Fibroblast Primary Cells	Other	BMI	25673413	0.122345	0.0286973	1.36654	0.320538	0.257424	-1.81e-08	1.1e-08	0.949367
iDnase	Ovary	Other	BMI	25673413	0.101103	0.0215711	1.33647	0.285146	0.230406	-3.02e-08	1.02e-08	0.998425
iDnase	Pancreas	Other	BMI	25673413	0.109068	0.0245677	1.78231	0.401466	0.0514444	-1.76e-08	1.37e-08	0.900299
iDnase	Pancreatic Islets	Other	BMI	25673413	0.104239	0.031438	1.81181	0.546432	0.122818	-1.8e-08	2.15e-08	0.798853
iDnase	Placenta	Other	BMI	25673413	0.135878	0.0206968	1.73216	0.263841	0.00737687	-1.51e-08	9.5e-09	0.943513
iDnase	Placenta Amnion	Other	BMI	25673413	0.106767	0.0263648	1.08242	0.267291	0.756652	-3e-08	1.02e-08	0.99833
iDnase	Colon Smooth Muscle	Sm. Muscle	BMI	25673413	0.110269	0.0239058	1.22829	0.266287	0.380407	-3.56e-08	1.02e-08	0.999771
iDnase	Duodenum Smooth Muscle	Sm. Muscle	BMI	25673413	0.100947	0.0265694	1.03111	0.271391	0.908298	-4.03e-08	1.25e-08	0.999345
iDnase	Rectal Smooth Muscle	Sm. Muscle	BMI	25673413	0.0896727	0.0208316	1.20998	0.281087	0.452937	-3.94e-08	1.19e-08	0.999551
iDnase	Stomach Smooth Muscle	Sm. Muscle	BMI	25673413	0.108903	0.0218119	1.37214	0.274822	0.169483	-3.23e-08	1.05e-08	0.998925
iDnase	ES-I3 Cells	Stem-cells	BMI	25673413	0.21405	0.0476088	2.34087	0.520653	0.00727238	8.36e-09	2.03e-08	0.340351
iDnase	ES-UCSF4 Cells	Stem-cells	BMI	25673413	0.287767	0.0300797	4.22862	0.442009	3.81e-10	7.34e-08	1.88e-08	4.71e-05
iDnase	ES-WA7 Cells	Stem-cells	BMI	25673413	0.20676	0.0414482	3.21051	0.643596	0.000522183	3.38e-08	2.41e-08	0.0807691
iDnase	H1 BMP4 Derived Mesendoderm Cultured Cells	Stem-cells	BMI	25673413	0.187939	0.0388407	2.77299	0.573087	0.00165842	1.68e-08	2.12e-08	0.21404
iDnase	H1 BMP4 Derived Trophoblast Cultured Cells	Stem-cells	BMI	25673413	0.110956	0.0264824	1.26654	0.302291	0.365477	-2.9e-08	1.04e-08	0.997327
iDnase	H1 Cells	Stem-cells	BMI	25673413	0.244506	0.0320122	3.76552	0.493005	4.24e-07	5.2e-08	1.9e-08	0.00308616
iDnase	H1 Derived Mesenchymal Stem Cells	Stem-cells	BMI	25673413	0.0804418	0.0286316	0.925568	0.329437	0.820828	-3.8e-08	1.14e-08	0.999555
iDnase	H9 Cells	Stem-cells	BMI	25673413	0.229395	0.0317323	3.97933	0.550461	1.43e-06	5.5e-08	2.1e-08	0.00437066
iDnase	hESC Derived CD184+ Endoderm Cultured Cells	Stem-cells	BMI	25673413	0.217836	0.051194	2.11281	0.496535	0.0185957	1.99e-09	2e-08	0.460314
iDnase	hESC Derived CD56+ Ectoderm Cultured Cells	Stem-cells	BMI	25673413	0.252824	0.0351995	3.82193	0.53211	2.06e-06	5.23e-08	2.33e-08	0.0124891
iDnase	hESC Derived CD56+ Mesoderm Cultured Cells	Stem-cells	BMI	25673413	0.117712	0.0471128	1.13331	0.453591	0.762721	-3.1e-08	1.66e-08	0.969188
iDnase	HUES48 Cells	Stem-cells	BMI	25673413	0.255775	0.0419821	3.29479	0.540796	1.79e-05	3.85e-08	1.98e-08	0.0260626
iDnase	HUES64 Cells	Stem-cells	BMI	25673413	0.239574	0.0457791	3.06977	0.586589	0.000366477	2.99e-08	2.18e-08	0.0856722
iDnase	HUES6 Cells	Stem-cells	BMI	25673413	0.232293	0.0443277	2.90614	0.55457	0.00050018	2.56e-08	2.12e-08	0.113384
iDnase	IMR90 fetal lung fibroblasts Cell Line	Stem-cells	BMI	25673413	0.117424	0.0314304	1.09866	0.294074	0.73294	-2.82e-08	1.07e-08	0.995815
iDnase	iPS-15b Cells	Stem-cells	BMI	25673413	0.267406	0.0426624	3.7637	0.600467	5.22e-06	5.4e-08	2.27e-08	0.00870988
iDnase	iPS-18 Cells	Stem-cells	BMI	25673413	0.259461	0.0432547	3.4331	0.572332	1.76e-05	4.38e-08	2.17e-08	0.0216659
iDnase	iPS-20b Cells	Stem-cells	BMI	25673413	0.225326	0.0415872	3.07095	0.56679	0.00021606	2.91e-08	2.07e-08	0.0798887
iDnase	iPS DF 19.11 Cells	Stem-cells	BMI	25673413	0.219937	0.0311073	3.26834	0.462266	8.14e-06	3.63e-08	1.98e-08	0.0335162
iDnase	iPS DF 6.9 Cells	Stem-cells	BMI	25673413	0.219479	0.0386269	4.09295	0.720332	3.41e-05	5.86e-08	2.76e-08	0.0169396
iDnase	Brain Angular Gyrus	Brain	Height	25282103	0.306016	0.0368516	3.41226	0.410918	2.86e-08	1.79e-08	3.4e-08	0.299221
iDnase	Brain Anterior Caudate	Brain	Height	25282103	0.334205	0.035234	3.62773	0.382458	1.42e-10	3.66e-08	3.26e-08	0.1305
iDnase	Brain Cingulate Gyrus	Brain	Height	25282103	0.33174	0.035862	3.61982	0.391313	2.77e-10	3.68e-08	3.3e-08	0.13235
iDnase	Brain Dorsolateral Prefrontal Cortex	Brain	Height	25282103	0.323581	0.0358242	3.72999	0.412954	5e-10	3.93e-08	3.59e-08	0.136964
iDnase	Brain Germinal Matrix	Brain	Height	25282103	0.191241	0.0314674	2.94905	0.485245	9.26e-05	-2.56e-08	3.31e-08	0.780539
iDnase	Brain Hippocampus Middle	Brain	Height	25282103	0.350938	0.0364353	3.42174	0.355254	1.91e-10	2.19e-08	3.19e-08	0.245909
iDnase	Brain Inferior Temporal Lobe	Brain	Height	25282103	0.304348	0.0354961	3.38434	0.394716	1.03e-08	1e-08	3.28e-08	0.380009
iDnase	Brain Substantia Nigra	Brain	Height	25282103	0.36967	0.0366148	4.06587	0.402713	2.15e-12	8.18e-08	3.45e-08	0.00888881
iDnase	Fetal Brain Female	Brain	Height	25282103	0.299597	0.0366655	3.09324	0.378559	1.63e-07	1.73e-08	2.75e-08	0.263945
iDnase	Fetal Brain Male	Brain	Height	25282103	0.265466	0.0366765	3.23863	0.447445	1.77e-06	5.68e-09	3.35e-08	0.432756
iDnase	Cortex derived primary cultured neurospheres	Brain	Height	25282103	0.270579	0.0344804	3.44088	0.438478	1.5e-07	2.29e-08	3.39e-08	0.24954
iDnase	Ganglion Eminence derived primary cultured neurospheres	Brain	Height	25282103	0.267657	0.0353777	3.41942	0.451964	3.8e-07	2.2e-08	3.36e-08	0.255906
iDnase	NH-A Astrocytes Primary Cells	Brain	Height	25282103	0.459179	0.0391914	4.12601	0.352159	6.79e-15	1.16e-07	2.85e-08	2.31e-05
iDnase	H1 Derived Neuronal Progenitor Cultured Cells	Stem-cells	Height	25282103	0.257145	0.0343168	4.12467	0.550449	4.54e-08	6.81e-08	4.15e-08	0.0504753
iDnase	H9 Derived Neuronal Progenitor Cultured Cells	Stem-cells	Height	25282103	0.3035	0.0354858	4.05447	0.474056	9.36e-10	7.07e-08	3.82e-08	0.0321259
iDnase	H9 Derived Neuron Cultured Cells	Stem-cells	Height	25282103	0.251879	0.0348045	3.15039	0.435319	1.59e-06	-5.23e-09	3.36e-08	0.561877
iDnase	Adipose Nuclei	Adipose	Height	25282103	0.437739	0.0335359	4.31905	0.330889	4.61e-18	1.27e-07	3.1e-08	2.27e-05
iDnase	Fetal Adrenal Gland	Adrenal	Height	25282103	0.410958	0.0344498	4.55923	0.382191	1.34e-16	1.37e-07	3.25e-08	1.28e-05
iDnase	Osteoblast Primary Cells	Bone	Height	25282103	0.496373	0.0356961	4.52366	0.325314	8.91e-21	1.5e-07	2.48e-08	8.09e-10
iDnase	Colonic Mucosa	Digestive	Height	25282103	0.313481	0.034509	4.28442	0.471643	1.19e-10	7.89e-08	4.02e-08	0.0247478
iDnase	Duodenum Mucosa	Digestive	Height	25282103	0.229675	0.0323859	3.0485	0.42986	3.3e-06	-2.57e-08	3.43e-08	0.773553
iDnase	Esophagus	Digestive	Height	25282103	0.276083	0.0349961	3.96546	0.50266	1.79e-08	4.61e-08	3.95e-08	0.121681
iDnase	Fetal Intestine Large	Digestive	Height	25282103	0.253697	0.0324567	3.57705	0.457629	7.37e-08	1.67e-08	3.31e-08	0.306667
iDnase	Fetal Intestine Small	Digestive	Height	25282103	0.285156	0.0351482	3.44118	0.42416	3.73e-08	2.57e-08	3.3e-08	0.217501
iDnase	Fetal Stomach	Digestive	Height	25282103	0.43851	0.0338707	4.81375	0.371816	1.57e-17	1.72e-07	3.5e-08	4.66e-07
iDnase	Gastric	Digestive	Height	25282103	0.273399	0.0360627	4.02292	0.530643	4.8e-08	4.83e-08	4.25e-08	0.127831
iDnase	Rectal Mucosa 1	Digestive	Height	25282103	0.262264	0.0332217	3.58261	0.453819	5.86e-08	1.87e-08	3.62e-08	0.302542
iDnase	Rectal Mucosa 2	Digestive	Height	25282103	0.252984	0.0334265	3.48783	0.460844	2.33e-07	1.23e-08	3.54e-08	0.364438
iDnase	Sigmoid Colon	Digestive	Height	25282103	0.244231	0.0338599	3.45836	0.479463	7.95e-07	2.81e-09	3.8e-08	0.47051
iDnase	Small Intestine	Digestive	Height	25282103	0.280357	0.033353	3.82829	0.455438	2.92e-09	4.61e-08	3.7e-08	0.106498
iDnase	Stomach Mucosa	Digestive	Height	25282103	0.261191	0.0369726	3.35075	0.474311	1.44e-06	4.34e-09	3.63e-08	0.452514
iDnase	Breast Myoepithelial Primary Cells	Epithelial	Height	25282103	0.409063	0.0385094	3.73239	0.351369	7.5e-13	7.76e-08	2.54e-08	0.00112756
[truncated: 1,271 more rows]
