# Supplementary material for: An atlas of chromatin accessibility in the adult human brain
Source: HighWire-hosted journal article supplement (doi:10.1101/gr.232488.117), 2018-06-26
Supplement: Supplemental_Table_S8.xlsx [file Supplemental_Table_S8.xlsx]

## Sheet: selected_peaks
Classifier	OCR name	Chromosome	OCR start position	OCR end position
Cell type (2-class)	Peak_76309	chr13	97896549	97897130
Cell type (2-class)	Peak_129756	chr2	106776379	106777317
Cell type (2-class)	Peak_149082	chr20	39748289	39749366
Cell type and brain region: cortical/subcortical (4-class)	Peak_81931	chr14	50490683	50491355
Cell type and brain region: cortical/subcortical (4-class)	Peak_210909	chr5	58895448	58896179
Cell type and brain region: cortical/subcortical (4-class)	Peak_47606	chr11	95649076	95649684
Cell type and brain region: cortical/subcortical (4-class)	Peak_234718	chr6	82189722	82190288
Cell type and brain region: cortical/subcortical (4-class)	Peak_272560	chr8	71957332	71957940
Cell type and brain region: cortical/subcortical (4-class)	Peak_102707	chr17	36413126	36413750
Cell type and brain region: cortical/subcortical (4-class)	Peak_109328	chr18	30209793	30210609
Cell type and brain region: cortical/subcortical (4-class)	Peak_241811	chr6	134666759	134667417
Cell type and brain region: cortical/subcortical (4-class)	Peak_277293	chr8	108393089	108394151
Cell type and brain region: cortical/subcortical (4-class)	Peak_10418	chr1	116551286	116552315
Cell type and brain region: cortical/subcortical (4-class)	Peak_38909	chr11	17458030	17458553
Cell type and brain region: cortical/subcortical (4-class)	Peak_196281	chr4	138466304	138467031
Cell type and brain region: cortical/subcortical (4-class)	Peak_189049	chr4	81602412	81603327
Cell type and brain region: cortical/subcortical (4-class)	Peak_59768	chr12	68246282	68247524
Cell type and brain region: cortical/subcortical (4-class)	Peak_238549	chr6	112600525	112601256
Cell type and brain region: cortical/subcortical (4-class)	Peak_133064	chr2	137296063	137296450
Cell type and brain region: cortical/subcortical (4-class)	Peak_199039	chr4	157322500	157323223
Cell type and brain region: cortical/subcortical (4-class)	Peak_99867	chr16	78019856	78020730
Cell type and brain region: cortical/subcortical (4-class)	Peak_185970	chr4	56667474	56668275
Cell type and brain region: cortical/subcortical (4-class)	Peak_248607	chr7	18997935	18998839
Cell type and brain region: cortical/subcortical (4-class)	Peak_218027	chr5	114755516	114756219
Cell type and brain region: cortical/subcortical (4-class)	Peak_144930	chr2	231554835	231555657
Cell type and brain region: cortical/subcortical (4-class)	Peak_144278	chr2	226434417	226435153
Cell type and brain region: cortical/subcortical (4-class)	Peak_185602	chr4	53488985	53489422
Cell type and brain region: cortical/subcortical (4-class)	Peak_143289	chr2	217481604	217482652
Cell type and brain region: cortical/subcortical (4-class)	Peak_14300	chr1	172878615	172879385
Cell type and brain region: cortical/subcortical (4-class)	Peak_40409	chr11	27782398	27783498
Cell type and brain region: cortical/subcortical (4-class)	Peak_54523	chr12	22195893	22196393
Cell type and brain region: cortical/subcortical (4-class)	Peak_233892	chr6	76046916	76047706
Cell type and brain region: cortical/subcortical (4-class)	Peak_45526	chr11	77096929	77097662
Cell type and brain region: cortical/subcortical (4-class)	Peak_114443	chr18	66405659	66406306
Cell type and brain region: cortical/subcortical (4-class)	Peak_279808	chr8	126395931	126396349
Cell type and brain region: cortical/subcortical (4-class)	Peak_29702	chr10	65388327	65388845
Cell type and brain region: cortical/subcortical (4-class)	Peak_70457	chr13	48415018	48415970
Cell type and brain region: cortical/subcortical (4-class)	Peak_81586	chr14	47216461	47216956
Cell type and brain region: cortical/subcortical (4-class)	Peak_211957	chr5	66661982	66662886
Cell type and brain region: cortical/subcortical (4-class)	Peak_55432	chr12	28067920	28068659
Cell type and brain region: cortical/subcortical (4-class)	Peak_164600	chr3	70267406	70268063
Cell type and brain region: cortical/subcortical (4-class)	Peak_176326	chr3	169257456	169258344
Cell type and brain region: cortical/subcortical (4-class)	Peak_13467	chr1	167137609	167138689
Cell type and brain region: cortical/subcortical (4-class)	Peak_287181	chr9	74174785	74175498
Cell type and brain region: cortical/subcortical (4-class)	Peak_152839	chr21	26873718	26874543
Cell type and brain region: cortical/subcortical (4-class)	Peak_35090	chr10	116665221	116665744
Cell type and brain region: cortical/subcortical (4-class)	Peak_24876	chr10	20602441	20603919
Cell type and brain region: cortical/subcortical (4-class)	Peak_194483	chr4	122655701	122656580
Cell type and brain region: cortical/subcortical (4-class)	Peak_146366	chr20	5980226	5980803
Cell type and brain region: cortical/subcortical (4-class)	Peak_154683	chr21	41776143	41776839
Cell type and brain region: cortical/subcortical (4-class)	Peak_147578	chr20	18230357	18230738
Cell type and brain region: cortical/subcortical (4-class)	Peak_63248	chr12	94384682	94386429
Cell type and brain region: cortical/subcortical (4-class)	Peak_14271	chr1	172668858	172669615
Cell type and brain region: cortical/subcortical (4-class)	Peak_59699	chr12	67865509	67866078
Cell type and brain region: cortical/subcortical (4-class)	Peak_139343	chr2	187408225	187408767
Cell type and brain region: cortical/subcortical (4-class)	Peak_140016	chr2	191606005	191606922
Cell type and brain region: cortical/subcortical (4-class)	Peak_235504	chr6	88345969	88346629
Cell type and brain region: cortical/subcortical (4-class)	Peak_15019	chr1	179071404	179071752
Cell type and brain region: cortical/subcortical (4-class)	Peak_13914	chr1	169870900	169871750
Cell type and brain region: cortical/subcortical (4-class)	Peak_167694	chr3	98113473	98114415
Cell type and brain region: cortical/subcortical (4-class)	Peak_49090	chr11	108345309	108345877
Cell type and brain region: cortical/subcortical (4-class)	Peak_40817	chr11	30583205	30584250
Cell type and brain region: cortical/subcortical (4-class)	Peak_233929	chr6	76329002	76329696
Cell type and brain region: cortical/subcortical (4-class)	Peak_134782	chr2	151408326	151409001
Cell type and brain region: cortical/subcortical (4-class)	Peak_7211	chr1	90040571	90041300
Cell type and brain region: cortical/subcortical (4-class)	Peak_3277	chr1	54362081	54362663
Cell type and brain region: cortical/subcortical (4-class)	Peak_292293	chr9	115635844	115636550
Cell type and brain region: cortical/subcortical (4-class)	Peak_160990	chr3	31291651	31292401
Cell type and brain region: cortical/subcortical (4-class)	Peak_233604	chr6	73686088	73686754
Cell type and brain region: cortical/subcortical (4-class)	Peak_89154	chr15	33437291	33438324
Cell type and brain region: cortical/subcortical (4-class)	Peak_39403	chr11	20585214	20585992
Cell type and brain region: cortical/subcortical (4-class)	Peak_59449	chr12	66042858	66043221
Cell type and brain region: cortical/subcortical (4-class)	Peak_278448	chr8	117355019	117355678
Cell type and brain region: cortical/subcortical (4-class)	Peak_95655	chr15	100681208	100682224
Cell type and brain region: cortical/subcortical (4-class)	Peak_295389	chrX	9908236	9909051
Cell type and brain region: cortical/subcortical (4-class)	Peak_178033	chr3	182627312	182627917
Cell type and brain region: cortical/subcortical (4-class)	Peak_205426	chr5	16186684	16187409
Cell type and brain region: cortical/subcortical (4-class)	Peak_293556	chr9	124683652	124684276
Cell type and brain region: cortical/subcortical (4-class)	Peak_184401	chr4	42161353	42161846
Cell type and brain region: cortical/subcortical (4-class)	Peak_228239	chr6	20440497	20440944
Cell type and brain region: cortical/subcortical (4-class)	Peak_176383	chr3	169734412	169735128
Cell type and brain region: cortical/subcortical (4-class)	Peak_192810	chr4	110296924	110297444
Cell type and brain region: cortical/subcortical (4-class)	Peak_91149	chr15	52539343	52540347
Cell type and brain region: cortical/subcortical (4-class)	Peak_90419	chr15	46183870	46184844
Cell type and brain region: cortical/subcortical (4-class)	Peak_168983	chr3	107724989	107726425
Cell type and brain region: cortical/subcortical (4-class)	Peak_41450	chr11	35138174	35139302
Cell type and brain region: cortical/subcortical (4-class)	Peak_195887	chr4	134496500	134497386
Cell type and brain region: cortical/subcortical (4-class)	Peak_274149	chr8	83575411	83576056
Cell type and brain region: cortical/subcortical (4-class)	Peak_276438	chr8	101440961	101441482
Cell type and brain region: cortical/subcortical (4-class)	Peak_300176	chrX	112664550	112665264
Cell type and brain region: cortical/subcortical (4-class)	Peak_82938	chr14	57969223	57969957
Cell type and brain region: cortical/subcortical (4-class)	Peak_257241	chr7	92419938	92420923
Cell type and brain region: cortical/subcortical (4-class)	Peak_184493	chr4	42844010	42844691
Cell type and brain region: cortical/subcortical (4-class)	Peak_210504	chr5	56237797	56238211
Cell type and brain region: cortical/subcortical (4-class)	Peak_119964	chr2	11559695	11560757
Cell type and brain region: cortical/subcortical (4-class)	Peak_73375	chr13	74544430	74545004
Cell type and brain region: cortical/subcortical (4-class)	Peak_290870	chr9	104344487	104345308
Cell type and brain region: cortical/subcortical (4-class)	Peak_93937	chr15	83329234	83330204
Cell type and brain region: cortical/subcortical (4-class)	Peak_222429	chr5	150810212	150810736
Cell type and brain region: cortical/subcortical (4-class)	Peak_70739	chr13	50590482	50590922
Cell type and brain region: cortical/subcortical (4-class)	Peak_190104	chr4	89611606	89612505
Cell type and brain region: cortical/subcortical (4-class)	Peak_249499	chr7	25094282	25095053
Cell type and brain region: cortical/subcortical (4-class)	Peak_199136	chr4	157936143	157936758
Cell type and brain region: cortical/subcortical (4-class)	Peak_192949	chr4	111210853	111211558
Cell type and brain region: cortical/subcortical (4-class)	Peak_217790	chr5	113305449	113306333
Cell type and brain region: cortical/subcortical (4-class)	Peak_15170	chr1	181045246	181045812
Cell type and brain region: cortical/subcortical (4-class)	Peak_184845	chr4	45631580	45632700
Cell type and brain region: cortical/subcortical (4-class)	Peak_14400	chr1	173821337	173821675
Cell type and brain region: cortical/subcortical (4-class)	Peak_63799	chr12	98836231	98836752
Cell type and brain region: cortical/subcortical (4-class)	Peak_11282	chr1	147257913	147259048
Cell type and brain region: cortical/subcortical (4-class)	Peak_290508	chr9	101749319	101750316
Cell type and brain region: cortical/subcortical (4-class)	Peak_197298	chr4	145794417	145794800
Cell type and brain region: cortical/subcortical (4-class)	Peak_83013	chr14	58633016	58634257
Cell type and brain region: cortical/subcortical (4-class)	Peak_147739	chr20	20318689	20319448
Cell type and brain region: cortical/subcortical (4-class)	Peak_219805	chr5	126925022	126925820
Cell type and brain region: cortical/subcortical (4-class)	Peak_202115	chr4	180189875	180190578
Cell type and brain region: cortical/subcortical (4-class)	Peak_280403	chr8	131097980	131098723
Cell type and brain region: cortical/subcortical (4-class)	Peak_89855	chr15	39984793	39985696
Cell type and brain region: 5 regions (10-class)	Peak_101550	chr17	13278021	13278538
Cell type and brain region: 5 regions (10-class)	Peak_146113	chr20	3707788	3708882
Cell type and brain region: 5 regions (10-class)	Peak_141084	chr2	200028258	200029100
Cell type and brain region: 5 regions (10-class)	Peak_39060	chr11	18640066	18640615
Cell type and brain region: 5 regions (10-class)	Peak_18311	chr1	205092038	205092445
Cell type and brain region: 5 regions (10-class)	Peak_41450	chr11	35138174	35139302
Cell type and brain region: 5 regions (10-class)	Peak_93530	chr15	78799250	78800267
Cell type and brain region: 5 regions (10-class)	Peak_92509	chr15	65551621	65552363
Cell type and brain region: 5 regions (10-class)	Peak_293370	chr9	123495438	123495951
Cell type and brain region: 5 regions (10-class)	Peak_96340	chr16	7937250	7937663
Cell type and brain region: 5 regions (10-class)	Peak_231427	chr6	52403287	52404248
Cell type and brain region: 5 regions (10-class)	Peak_44155	chr11	60493155	60494003
Cell type and brain region: 5 regions (10-class)	Peak_44320	chr11	61367625	61368689
Cell type and brain region: 5 regions (10-class)	Peak_289351	chr9	90664810	90665295
Cell type and brain region: 5 regions (10-class)	Peak_273293	chr8	77599043	77599871
Cell type and brain region: 5 regions (10-class)	Peak_271841	chr8	66893416	66894235
Cell type and brain region: 5 regions (10-class)	Peak_51424	chr11	130380368	130380663
Cell type and brain region: 5 regions (10-class)	Peak_286777	chr9	71445106	71445944
Cell type and brain region: 5 regions (10-class)	Peak_148452	chr20	30919955	30920708
Cell type and brain region: 5 regions (10-class)	Peak_255231	chr7	76985817	76986455
Cell type and brain region: 5 regions (10-class)	Peak_297507	chrX	48688407	48688704
Cell type and brain region: 5 regions (10-class)	Peak_95304	chr15	96873242	96874368
Cell type and brain region: 5 regions (10-class)	Peak_12631	chr1	161745938	161746947
Cell type and brain region: 5 regions (10-class)	Peak_275745	chr8	95338004	95338994
Cell type and brain region: 5 regions (10-class)	Peak_210909	chr5	58895448	58896179
Cell type and brain region: 5 regions (10-class)	Peak_227924	chr6	18004499	18005155
Cell type and brain region: 5 regions (10-class)	Peak_167694	chr3	98113473	98114415
Cell type and brain region: 5 regions (10-class)	Peak_10685	chr1	118510101	118511387
Cell type and brain region: 5 regions (10-class)	Peak_30198	chr10	70183087	70183389
Cell type and brain region: 5 regions (10-class)	Peak_15170	chr1	181045246	181045812
Cell type and brain region: 5 regions (10-class)	Peak_172194	chr3	139424336	139424912
Cell type and brain region: 5 regions (10-class)	Peak_13292	chr1	165998532	165999537
Cell type and brain region: 5 regions (10-class)	Peak_60026	chr12	70095474	70096143
Cell type and brain region: 5 regions (10-class)	Peak_142120	chr2	208500251	208500931
Cell type and brain region: 5 regions (10-class)	Peak_29026	chr10	61049491	61050422
Cell type and brain region: 5 regions (10-class)	Peak_265369	chr8	12424399	12425107
Cell type and brain region: 5 regions (10-class)	Peak_32544	chr10	95863674	95864041
Cell type and brain region: 5 regions (10-class)	Peak_133064	chr2	137296063	137296450
Cell type and brain region: 5 regions (10-class)	Peak_179469	chr3	193616776	193617188
Cell type and brain region: 5 regions (10-class)	Peak_200373	chr4	166527566	166528090
Cell type and brain region: 5 regions (10-class)	Peak_226314	chr6	5762598	5763191
Cell type and brain region: 5 regions (10-class)	Peak_190753	chr4	95378748	95379295
Cell type and brain region: 5 regions (10-class)	Peak_269246	chr8	47840566	47841249
Cell type and brain region: 5 regions (10-class)	Peak_279962	chr8	127468378	127469144
Cell type and brain region: 5 regions (10-class)	Peak_301733	chrX	139014186	139016010
Cell type and brain region: 5 regions (10-class)	Peak_143324	chr2	217714686	217715154
Cell type and brain region: 5 regions (10-class)	Peak_65338	chr12	112078296	112078510
Cell type and brain region: 5 regions (10-class)	Peak_24686	chr10	18912412	18912841
Cell type and brain region: 5 regions (10-class)	Peak_154258	chr21	37279729	37280140
Cell type and brain region: 5 regions (10-class)	Peak_67080	chr13	22628693	22629300
Cell type and brain region: 5 regions (10-class)	Peak_29702	chr10	65388327	65388845
Cell type and brain region: 5 regions (10-class)	Peak_32146	chr10	92393291	92393770
Cell type and brain region: 5 regions (10-class)	Peak_190842	chr4	96111835	96112679
Cell type and brain region: 5 regions (10-class)	Peak_207988	chr5	34994068	34994799
Cell type and brain region: 5 regions (10-class)	Peak_5598	chr1	77244903	77245565
Cell type and brain region: 5 regions (10-class)	Peak_228742	chr6	24576685	24577085
Cell type and brain region: 5 regions (10-class)	Peak_223284	chr5	157630135	157631008
Cell type and brain region: 5 regions (10-class)	Peak_38896	chr11	17389748	17390553
Cell type and brain region: 5 regions (10-class)	Peak_43850	chr11	57829060	57829906
Cell type and brain region: 5 regions (10-class)	Peak_43746	chr11	57145712	57146411
Cell type and brain region: 5 regions (10-class)	Peak_254453	chr7	65429200	65429834
Cell type and brain region: 5 regions (10-class)	Peak_230507	chr6	45753837	45754566
Cell type and brain region: 5 regions (10-class)	Peak_235560	chr6	88654781	88656322
Cell type and brain region: 5 regions (10-class)	Peak_263940	chr7	148361426	148361870
Cell type and brain region: 5 regions (10-class)	Peak_82054	chr14	51306138	51307289
Cell type and brain region: 5 regions (10-class)	Peak_35581	chr10	122336847	122337232
Cell type and brain region: 5 regions (10-class)	Peak_197219	chr4	145267973	145268981
Cell type and brain region: 5 regions (10-class)	Peak_127024	chr2	75904318	75905011
Cell type and brain region: 5 regions (10-class)	Peak_8048	chr1	96671801	96672630
Cell type and brain region: 5 regions (10-class)	Peak_32292	chr10	93542508	93543065
Cell type and brain region: 5 regions (10-class)	Peak_242131	chr6	136683539	136684654
Cell type and brain region: 5 regions (10-class)	Peak_101300	chr17	9789134	9790261
Cell type and brain region: 5 regions (10-class)	Peak_120810	chr2	17285737	17286341
Cell type and brain region: 5 regions (10-class)	Peak_32419	chr10	94791819	94792517
Cell type and brain region: 5 regions (10-class)	Peak_144930	chr2	231554835	231555657
Cell type and brain region: 5 regions (10-class)	Peak_32478	chr10	95349627	95350359
Cell type and brain region: 5 regions (10-class)	Peak_22791	chr1	245581420	245581932
Cell type and brain region: 5 regions (10-class)	Peak_230495	chr6	45619810	45620774
Cell type and brain region: 5 regions (10-class)	Peak_178571	chr3	186927234	186927833
Cell type and brain region: 5 regions (10-class)	Peak_8532	chr1	100434795	100436317
Cell type and brain region: 5 regions (10-class)	Peak_269002	chr8	42473857	42474721
Cell type and brain region: 5 regions (10-class)	Peak_209181	chr5	43282401	43283018
Cell type and brain region: 5 regions (10-class)	Peak_176740	chr3	171975514	171976134
Cell type and brain region: 5 regions (10-class)	Peak_232137	chr6	56974449	56975141
Cell type and brain region: 5 regions (10-class)	Peak_179384	chr3	192907641	192908589
Cell type and brain region: 5 regions (10-class)	Peak_247075	chr7	7832792	7833293
Cell type and brain region: 5 regions (10-class)	Peak_207847	chr5	34175913	34176470
Cell type and brain region: 5 regions (10-class)	Peak_149683	chr20	47647507	47647765
Cell type and brain region: 5 regions (10-class)	Peak_11645	chr1	153334899	153335851
Cell type and brain region: 5 regions (10-class)	Peak_299944	chrX	109351320	109352083
Cell type and brain region: 5 regions (10-class)	Peak_76350	chr13	98040077	98040340
Cell type and brain region: 5 regions (10-class)	Peak_205504	chr5	16617718	16618069
Cell type and brain region: 5 regions (10-class)	Peak_67390	chr13	25199052	25199601
Cell type and brain region: 5 regions (10-class)	Peak_22705	chr1	244228017	244228968
Cell type and brain region: 5 regions (10-class)	Peak_228217	chr6	20333965	20335166
Cell type and brain region: 5 regions (10-class)	Peak_98007	chr16	56171040	56171839
Cell type and brain region: 5 regions (10-class)	Peak_120018	chr2	11866383	11867049
Cell type and brain region: 5 regions (10-class)	Peak_282132	chr9	95129	95472
Cell type and brain region: 5 regions (10-class)	Peak_10615	chr1	117864206	117865024
Cell type and brain region: 5 regions (10-class)	Peak_193241	chr4	113369737	113369946
Cell type and brain region: 5 regions (10-class)	Peak_44074	chr11	59622281	59622850
Cell type and brain region: 5 regions (10-class)	Peak_23254	chr10	4088934	4089446
Cell type and brain region: 5 regions (10-class)	Peak_268349	chr8	37391563	37392306
Cell type and brain region: 5 regions (10-class)	Peak_15140	chr1	180811740	180812411
Cell type and brain region: 5 regions (10-class)	Peak_183409	chr4	34067598	34068323
Cell type and brain region: 5 regions (10-class)	Peak_174663	chr3	156419344	156419813
Cell type and brain region: 5 regions (10-class)	Peak_221680	chr5	143519207	143519470
Cell type and brain region: 5 regions (10-class)	Peak_120763	chr2	17021834	17022799
Cell type and brain region: 5 regions (10-class)	Peak_238155	chr6	109683434	109684354
Cell type and brain region: 5 regions (10-class)	Peak_38646	chr11	15440370	15440963
Cell type and brain region: 5 regions (10-class)	Peak_109233	chr18	29790213	29790966
Cell type and brain region: 5 regions (10-class)	Peak_235763	chr6	90124913	90125277
Cell type and brain region: 5 regions (10-class)	Peak_88595	chr15	25919958	25920690
Cell type and brain region: 5 regions (10-class)	Peak_75910	chr13	94821750	94822871
Cell type and brain region: 5 regions (10-class)	Peak_167151	chr3	93562819	93563256
Cell type and brain region: 5 regions (10-class)	Peak_176383	chr3	169734412	169735128
Cell type and brain region: 5 regions (10-class)	Peak_218100	chr5	115151312	115152921
Cell type and brain region: 5 regions (10-class)	Peak_50847	chr11	124061513	124061955
Cell type and brain region: 5 regions (10-class)	Peak_291782	chr9	111811054	111811549
Cell type and brain region: 5 regions (10-class)	Peak_21094	chr1	226653773	226654483
Cell type and brain region: 5 regions (10-class)	Peak_97971	chr16	55317914	55318836
Cell type and brain region: 5 regions (10-class)	Peak_6552	chr1	85756352	85756867
Cell type and brain region: 5 regions (10-class)	Peak_123829	chr2	44382865	44383483
Cell type and brain region: 5 regions (10-class)	Peak_60805	chr12	76347006	76348127
Cell type and brain region: 5 regions (10-class)	Peak_188073	chr4	74564393	74564841
Cell type and brain region: 5 regions (10-class)	Peak_27238	chr10	43039002	43039885
Cell type and brain region: 5 regions (10-class)	Peak_84178	chr14	69105785	69106737
Cell type and brain region: 5 regions (10-class)	Peak_292535	chr9	117485581	117486654
Cell type and brain region: 5 regions (10-class)	Peak_301550	chrX	136261538	136262237
Cell type and brain region: 5 regions (10-class)	Peak_289985	chr9	96250117	96251350
Cell type and brain region: 5 regions (10-class)	Peak_11154	chr1	144874048	144874753
Cell type and brain region: 5 regions (10-class)	Peak_199039	chr4	157322500	157323223
Cell type and brain region: 5 regions (10-class)	Peak_245668	chr6	162545502	162546456
Cell type and brain region: 5 regions (10-class)	Peak_166913	chr3	89156342	89157189
Cell type and brain region: 5 regions (10-class)	Peak_178650	chr3	187500775	187501504
Cell type and brain region: 5 regions (10-class)	Peak_133526	chr2	141516998	141517555
Cell type and brain region: 5 regions (10-class)	Peak_202115	chr4	180189875	180190578
Cell type and brain region: 5 regions (10-class)	Peak_164930	chr3	72609845	72610690
Cell type and brain region: 5 regions (10-class)	Peak_184845	chr4	45631580	45632700
Cell type and brain region: 5 regions (10-class)	Peak_263633	chr7	144167786	144168357
Cell type and brain region: 5 regions (10-class)	Peak_59699	chr12	67865509	67866078
Cell type and brain region: 5 regions (10-class)	Peak_292585	chr9	117805198	117805986
Cell type and brain region: 5 regions (10-class)	Peak_169895	chr3	114119064	114120086
Cell type and brain region: 5 regions (10-class)	Peak_4531	chr1	66082909	66083486
Cell type and brain region: 5 regions (10-class)	Peak_149251	chr20	41866219	41866793
Cell type and brain region: 5 regions (10-class)	Peak_32476	chr10	95340482	95341512
Cell type and brain region: 5 regions (10-class)	Peak_47448	chr11	94659782	94660538
Cell type and brain region: 5 regions (10-class)	Peak_262875	chr7	137039001	137040354
Cell type and brain region: 5 regions (10-class)	Peak_20709	chr1	223369869	223370572
Cell type and brain region: 5 regions (10-class)	Peak_71026	chr13	52484127	52484713
Cell type and brain region: 5 regions (10-class)	Peak_24352	chr10	16142379	16143197
Cell type and brain region: 5 regions (10-class)	Peak_1965	chr1	33438423	33438910
Cell type and brain region: 5 regions (10-class)	Peak_26632	chr10	35521243	35522082
Cell type and brain region: 5 regions (10-class)	Peak_222763	chr5	153340083	153340542
Cell type and brain region: 5 regions (10-class)	Peak_124772	chr2	54818588	54819323
Cell type and brain region: 5 regions (10-class)	Peak_257746	chr7	96429824	96430551
Cell type and brain region: 5 regions (10-class)	Peak_93562	chr15	79152836	79153169
Cell type and brain region: 5 regions (10-class)	Peak_289618	chr9	92827243	92827810
Cell type and brain region: 5 regions (10-class)	Peak_259903	chr7	114573004	114573396
Cell type and brain region: 5 regions (10-class)	Peak_99090	chr16	69184073	69184845
Cell type and brain region: 5 regions (10-class)	Peak_57338	chr12	45444405	45445444
Cell type and brain region: 5 regions (10-class)	Peak_47414	chr11	94463060	94463847
Cell type and brain region: 5 regions (10-class)	Peak_148427	chr20	30572587	30573346
Cell type and brain region: 5 regions (10-class)	Peak_250683	chr7	33419444	33420075
Cell type and brain region: 5 regions (10-class)	Peak_269996	chr8	54666466	54667229
Cell type and brain region: 5 regions (10-class)	Peak_43787	chr11	57398260	57399038
Cell type and brain region: 5 regions (10-class)	Peak_176161	chr3	167938249	167938911
Cell type and brain region: 5 regions (10-class)	Peak_203101	chr4	188357267	188358049
Cell type and brain region: 5 regions (10-class)	Peak_92148	chr15	61376655	61377114
Cell type and brain region: 5 regions (10-class)	Peak_195578	chr4	131675379	131675914
Cell type and brain region: 5 regions (10-class)	Peak_125044	chr2	56745065	56745481
Cell type and brain region: 5 regions (10-class)	Peak_277542	chr8	110025957	110026893
Cell type and brain region: 5 regions (10-class)	Peak_189346	chr4	83509340	83510309
Cell type and brain region: 5 regions (10-class)	Peak_83358	chr14	61789541	61790277
Cell type and brain region: 5 regions (10-class)	Peak_68046	chr13	31445660	31446457
Cell type and brain region: 5 regions (10-class)	Peak_167744	chr3	98438937	98439600
Cell type and brain region: 5 regions (10-class)	Peak_233939	chr6	76440204	76440667
Cell type and brain region: 5 regions (10-class)	Peak_144238	chr2	226135559	226135931
Cell type and brain region: 5 regions (10-class)	Peak_89307	chr15	34806417	34807544
Cell type and brain region: 5 regions (10-class)	Peak_189590	chr4	85495097	85495933
Cell type and brain region: 5 regions (10-class)	Peak_129197	chr2	102798704	102799085
Cell type and brain region: 5 regions (10-class)	Peak_292510	chr9	117278904	117279408
Cell type and brain region: 5 regions (10-class)	Peak_273979	chr8	82152588	82153139
Cell type and brain region: 5 regions (10-class)	Peak_11251	chr1	146628115	146628587
Cell type and brain region: 5 regions (10-class)	Peak_164357	chr3	68179385	68179982
Cell type and brain region: 5 regions (10-class)	Peak_117566	chr19	34432901	34433250
Cell type and brain region: 5 regions (10-class)	Peak_47004	chr11	91602351	91603354
Cell type and brain region: 5 regions (10-class)	Peak_226968	chr6	11174342	11175049
Cell type and brain region: 5 regions (10-class)	Peak_267139	chr8	27346219	27346989
Cell type and brain region: 5 regions (10-class)	Peak_104570	chr17	63688601	63689035
Cell type and brain region: 5 regions (10-class)	Peak_27686	chr10	48404148	48404567
Cell type and brain region: 5 regions (10-class)	Peak_289927	chr9	95793593	95794746
Cell type and brain region: 5 regions (10-class)	Peak_147951	chr20	23325235	23325686
Cell type and brain region: 5 regions (10-class)	Peak_285863	chr9	34379360	34379698
Cell type and brain region: 5 regions (10-class)	Peak_76656	chr13	100752402	100753229
Cell type and brain region: 5 regions (10-class)	Peak_44185	chr11	60686483	60686941
Cell type and brain region: 5 regions (10-class)	Peak_173460	chr3	149420552	149421295
Cell type and brain region: 5 regions (10-class)	Peak_287181	chr9	74174785	74175498
Cell type and brain region: 5 regions (10-class)	Peak_57904	chr12	51007982	51008486
Cell type and brain region: 5 regions (10-class)	Peak_137620	chr2	173215723	173216702
Cell type and brain region: 5 regions (10-class)	Peak_18254	chr1	204893067	204893637
Cell type and brain region: 5 regions (10-class)	Peak_275591	chr8	94449587	94450228
Cell type and brain region: 5 regions (10-class)	Peak_107369	chr18	12304312	12305405
Cell type and brain region: 5 regions (10-class)	Peak_191977	chr4	104332006	104332399
Cell type and brain region: 5 regions (10-class)	Peak_211078	chr5	60596950	60598019
Cell type and brain region: 5 regions (10-class)	Peak_289735	chr9	93881455	93881853
Cell type and brain region: 5 regions (10-class)	Peak_223648	chr5	160532538	160533194
Cell type and brain region: 5 regions (10-class)	Peak_31418	chr10	85640836	85642008
Cell type and brain region: 5 regions (10-class)	Peak_82358	chr14	53493592	53494446
Cell type and brain region: 5 regions (10-class)	Peak_68256	chr13	32976978	32977627
Cell type and brain region: 5 regions (10-class)	Peak_176576	chr3	170978026	170979103
Cell type and brain region: 5 regions (10-class)	Peak_300499	chrX	119492414	119493408
Cell type and brain region: 5 regions (10-class)	Peak_231193	chr6	50675220	50675924
Cell type and brain region: 5 regions (10-class)	Peak_292501	chr9	117232316	117233461
Cell type and brain region: 5 regions (10-class)	Peak_185970	chr4	56667474	56668275
Cell type and brain region: 5 regions (10-class)	Peak_154743	chr21	42655123	42655553
Cell type and brain region: 5 regions (10-class)	Peak_160990	chr3	31291651	31292401
Cell type and brain region: 5 regions (10-class)	Peak_24981	chr10	21424444	21425014
Cell type and brain region: 5 regions (10-class)	Peak_78824	chr14	24835796	24836728
Cell type and brain region: 5 regions (10-class)	Peak_101350	chr17	10147047	10148039
Cell type and brain region: 5 regions (10-class)	Peak_291606	chr9	110138032	110139074
Cell type and brain region: 5 regions (10-class)	Peak_23369	chr10	6162407	6163233
Cell type and brain region: 5 regions (10-class)	Peak_188544	chr4	77918557	77919301
Cell type and brain region: 5 regions (10-class)	Peak_13481	chr1	167224203	167224989
Cell type and brain region: 5 regions (10-class)	Peak_25867	chr10	28711975	28712927
Cell type and brain region: 5 regions (10-class)	Peak_285728	chr9	32716992	32717938
Cell type and brain region: 5 regions (10-class)	Peak_296944	chrX	38924262	38925239
Cell type and brain region: 5 regions (10-class)	Peak_200057	chr4	164456888	164457785
Cell type and brain region: 5 regions (10-class)	Peak_132966	chr2	136718528	136719299
Cell type and brain region: 5 regions (10-class)	Peak_84329	chr14	70167982	70168479
Cell type and brain region: 5 regions (10-class)	Peak_90327	chr15	45618674	45619569
Cell type and brain region: 5 regions (10-class)	Peak_278483	chr8	117584168	117585137
Cell type and brain region: 5 regions (10-class)	Peak_42523	chr11	43289460	43290414
Cell type and brain region: 5 regions (10-class)	Peak_168174	chr3	101283683	101284058
Cell type and brain region: 5 regions (10-class)	Peak_70221	chr13	46870919	46871539
Cell type and brain region: 5 regions (10-class)	Peak_44213	chr11	60804906	60805693
Cell type and brain region: 5 regions (10-class)	Peak_77414	chr13	107390292	107391528
Cell type and brain region: 5 regions (10-class)	Peak_269248	chr8	47871512	47872072
Cell type and brain region: 5 regions (10-class)	Peak_100072	chr16	80850183	80850636
Cell type and brain region: 5 regions (10-class)	Peak_37260	chr11	6265969	6266175
Cell type and brain region: 5 regions (10-class)	Peak_257446	chr7	94286133	94286597
Cell type and brain region: 5 regions (10-class)	Peak_287729	chr9	78154221	78155092
Cell type and brain region: 5 regions (10-class)	Peak_299324	chrX	99632447	99633414
Cell type and brain region: 5 regions (10-class)	Peak_225822	chr6	688362	688813
Cell type and brain region: 5 regions (10-class)	Peak_148879	chr20	36701852	36702234
Cell type and brain region: 5 regions (10-class)	Peak_92477	chr15	65117536	65118469
Cell type and brain region: 5 regions (10-class)	Peak_18465	chr1	206280183	206280475
Cell type and brain region: 5 regions (10-class)	Peak_275884	chr8	96493567	96494319
Cell type and brain region: 5 regions (10-class)	Peak_164600	chr3	70267406	70268063
Cell type and brain region: 5 regions (10-class)	Peak_84780	chr14	75345122	75345394
Cell type and brain region: 5 regions (10-class)	Peak_254617	chr7	68139664	68140273
Cell type and brain region: 5 regions (10-class)	Peak_179332	chr3	192520786	192521827
